# Supplementary material for: lncRNA requirements for mouse acute myeloid leukemia and normal differentiation
Source: eLife journal article supplement (doi:10.7554/elife.25607), 2017-09-06
Supplement: figures [file elife-25607-figures-v2.pdf]

---

## Figures and figure supplements

lncRNA requirements for mouse acute myeloid leukemia and normal differentiation

**M Joaquina Delás et al**

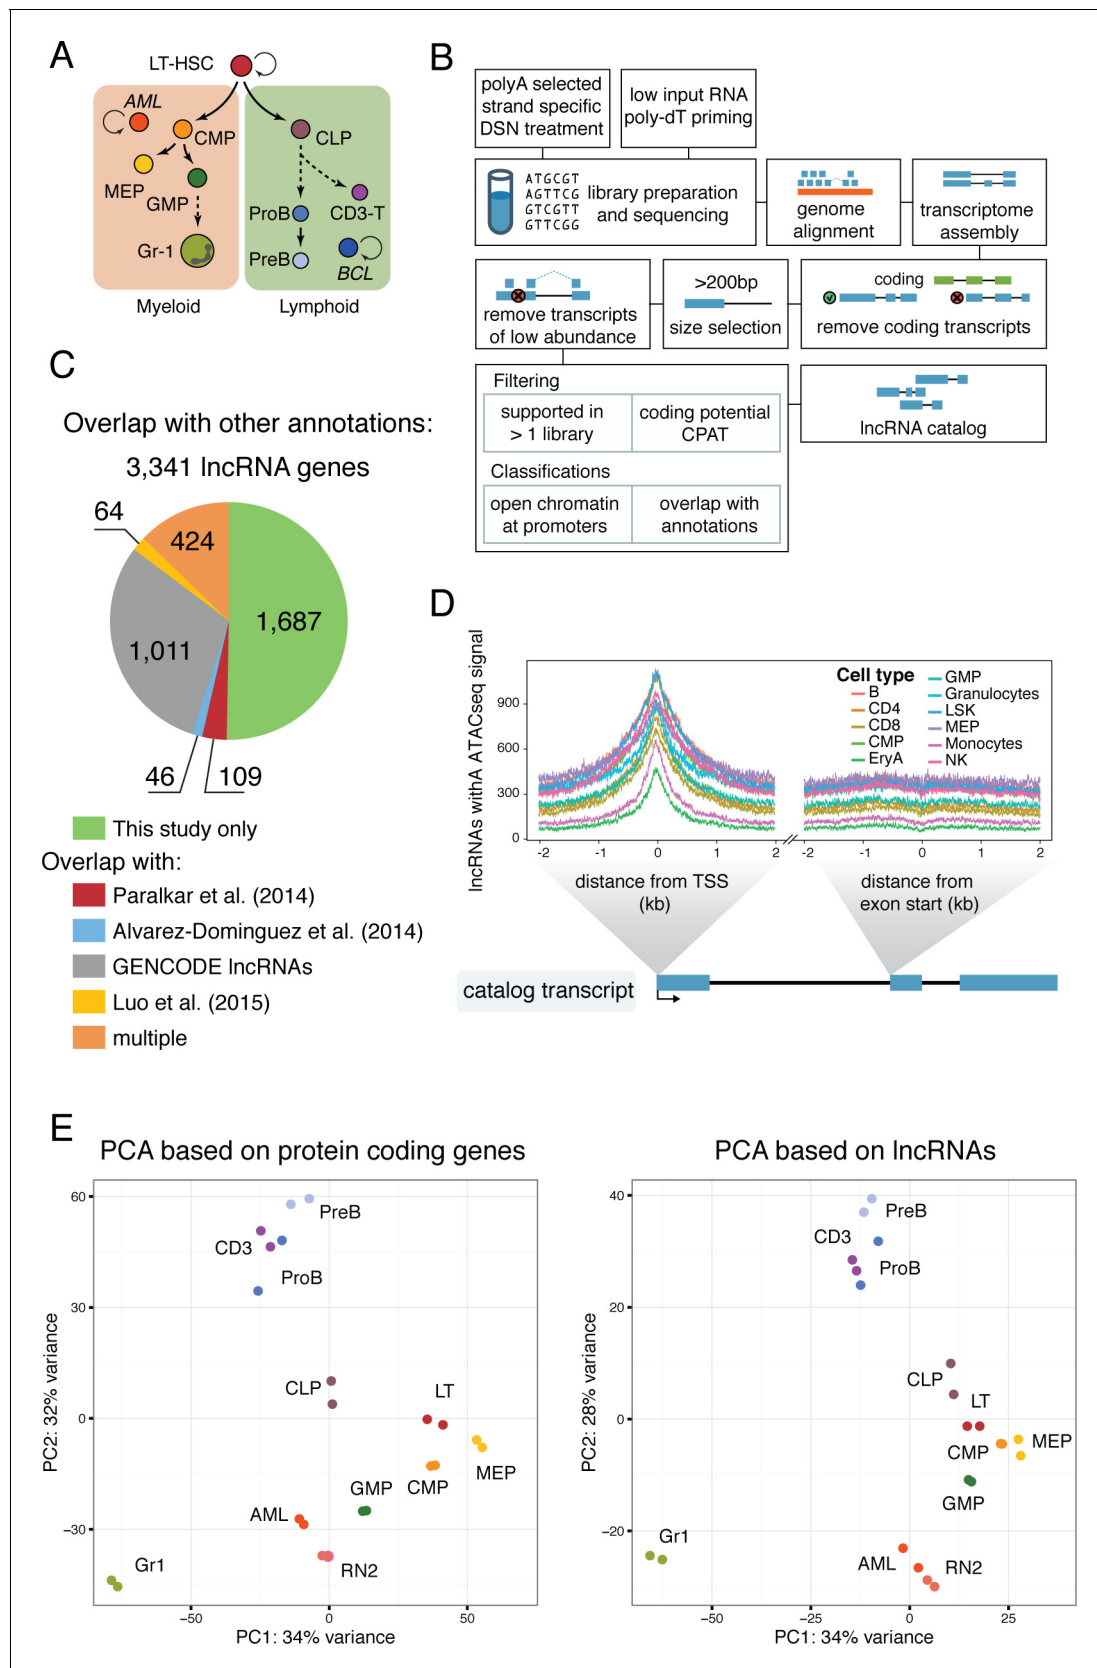

**Figure 1.** A lncRNA catalog of the murine hematopoietic system. (A) Schematic of analyzed cell types. Sorting plots can be found in **Figure 1—figure supplement 2**. (B) Pipeline for assembling the lncRNA catalog. See Materials and methods for full description. (C) Overlap of this study's lncRNA catalog with previously published non-coding annotations. Overlap is based on coordinates annotation of lncRNA exons. (D) ATAC-seq signal intensity, as a proxy for open chromatin, around the aggregated TSSs of our lncRNA catalog or the aggregated start sites of the second exons for the cell types indicated (ATAC-seq data from [Lara-Astiaso et al., 2014]). (E) Principal component analysis based on the most variable 500 protein coding genes (left) or catalog lncRNA genes (right). Each dot represents a biological replicate.

DOI: <https://doi.org/10.7554/eLife.25607.002>

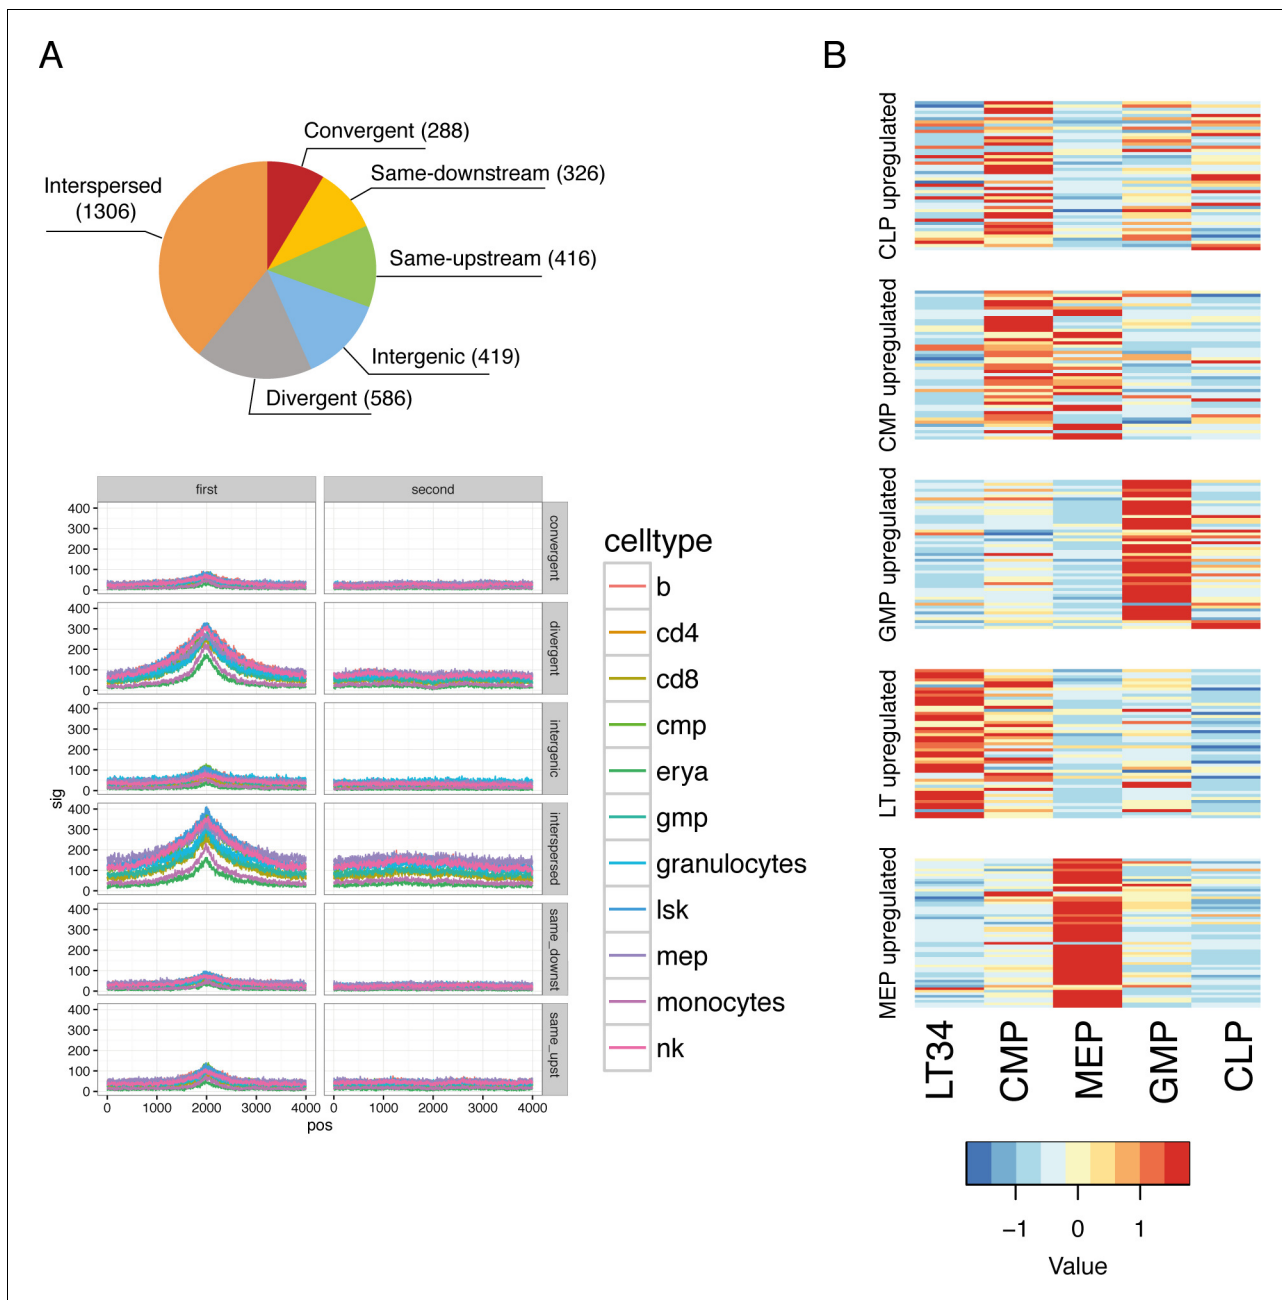

**Figure 1—figure supplement 1.** Validation of catalog transcriptional start sites and sorted progenitor identity. (A) Pie chart representing the number of lncRNAs that falls in each of the category depending on their relationship with their closest coding gene. ATACseq signal around the TSS for each of those relationships. (B) Expression heat maps for published microarray data (Gazit et al., 2013) is plotted for genes upregulated in the cell types indicated based on our RNAseq data.

DOI: <https://doi.org/10.7554/eLife.25607.003>

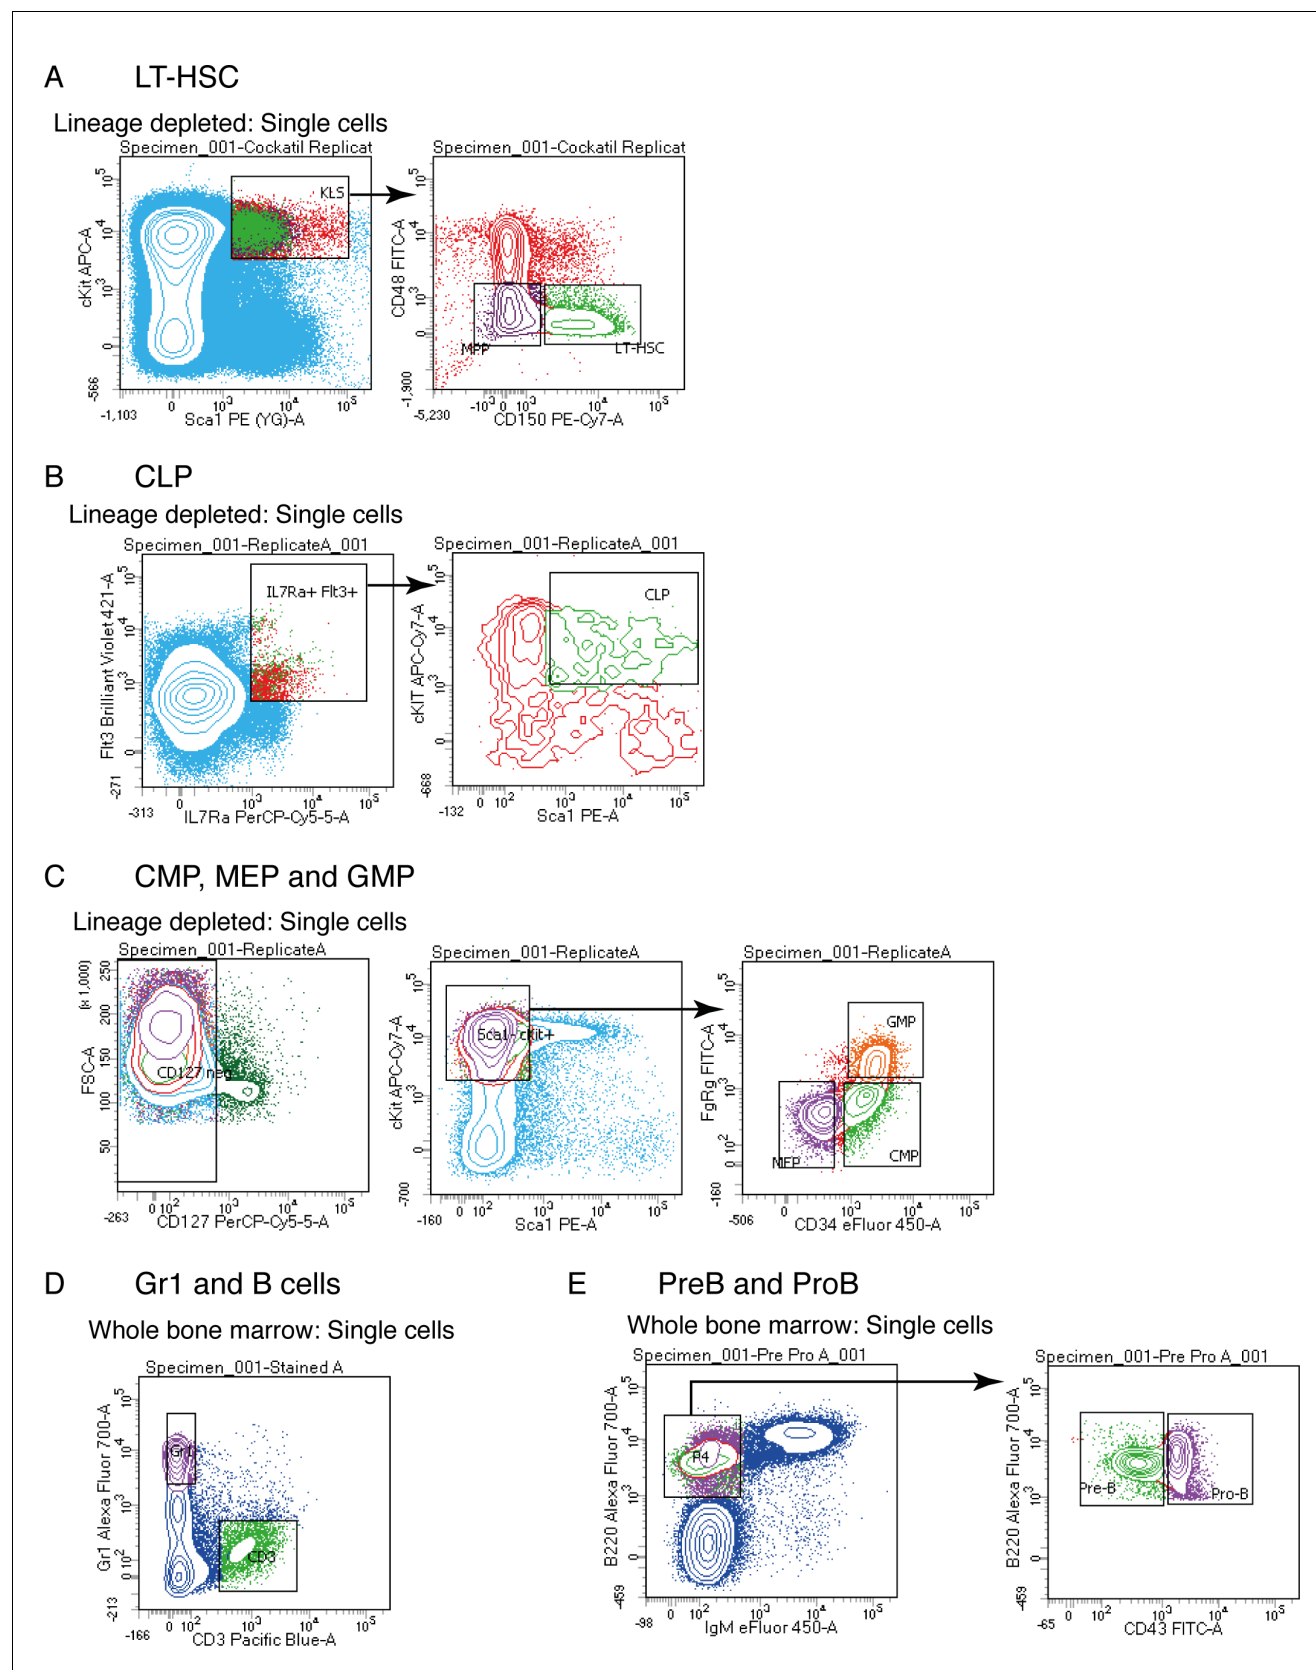

**Figure 1—figure supplement 2.** Isolation of primary hematopoietic cell types Flow cytometry sorting plots used to isolate LT-HSC (A), CLP (B), CMP, MEP and GMP (C), Gr1 and B cells (D) and PreB and ProB cells (E) for RNAseq library preparations.

DOI: <https://doi.org/10.7554/eLife.25607.004>

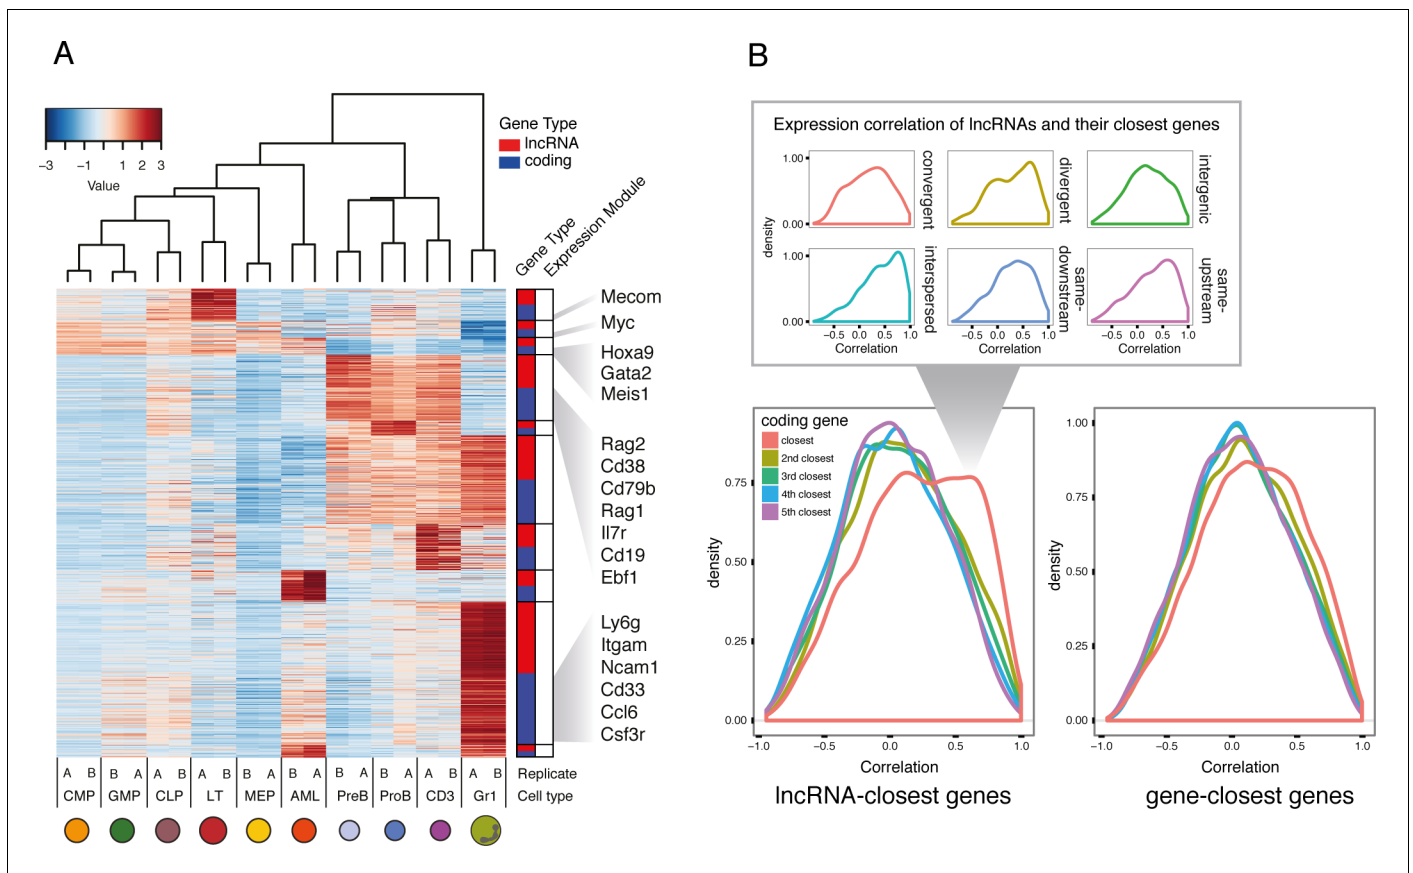

**Figure 2.** Expression profiles of lncRNAs through hematopoietic differentiation resemble broadly the profiles of protein-coding. **(A)** Expression data heatmap of the 15% most variable lncRNAs in each co-expression cluster, and the same number of most variable coding genes. Key hematopoietic genes are highlighted. **(B)** Density plot of correlation of expression for lncRNAs and their fifth closest coding genes. The density of the closest gene is categorized by genomic organization (right). As a comparison, correlation of genes and their closest genes is shown. Interspersed lncRNAs are not included in the main plot.

DOI: <https://doi.org/10.7554/eLife.25607.005>



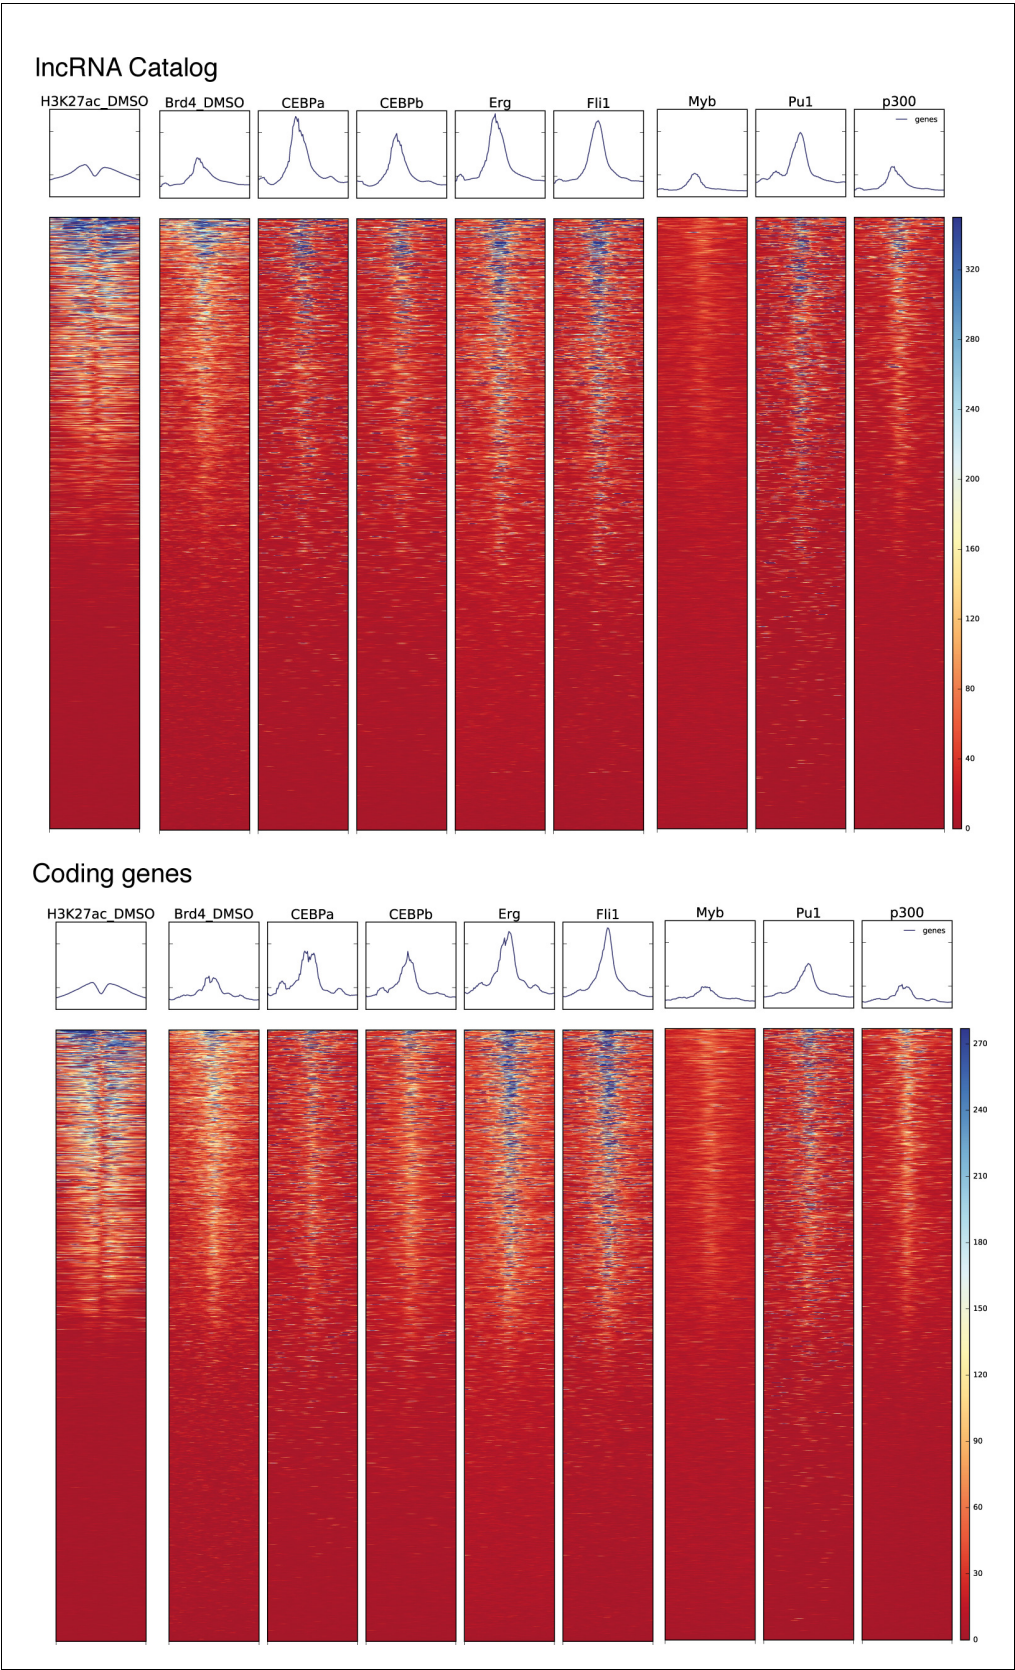

**Figure 2—figure supplement 1.** Regulatory landscape at the TSS of coding genes and lncRNAs. Heat maps for ChIPseq read density for the indicated histone modifications and transcription factors around the TSS of our lncRNA catalog genes or GENCODE's coding genes.

DOI: <https://doi.org/10.7554/eLife.25607.006>



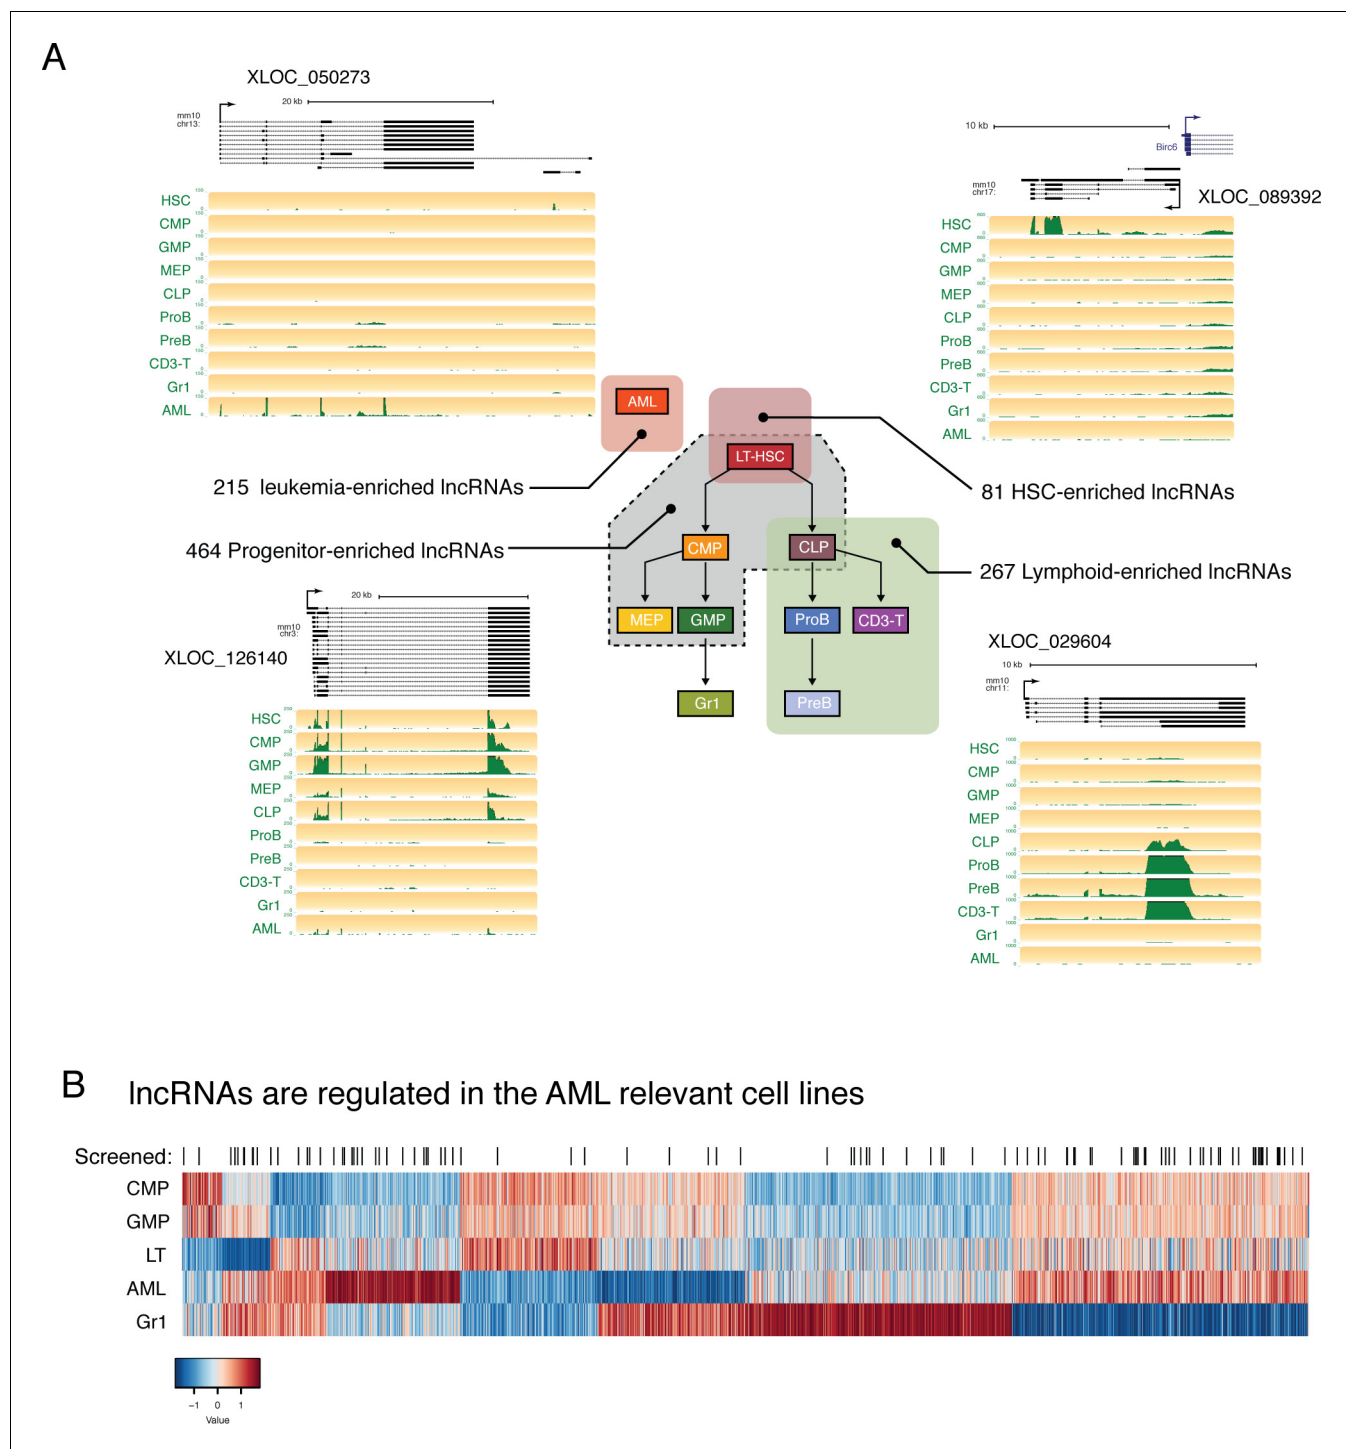

**Figure 3.** IncRNAs are differentially regulated through hematopoietic differentiation. (A) Genome Browser plots showing RNAseq coverage for representative IncRNA gene models in each of the indicated expression profiles along with the corresponding number of differentially expressed genes. (B) Heatmap of expression for IncRNAs differentially regulated between AML and relevant myeloid cell types. IncRNAs included in the in vivo AML screen are highlighted by black lines.

DOI: <https://doi.org/10.7554/eLife.25607.007>

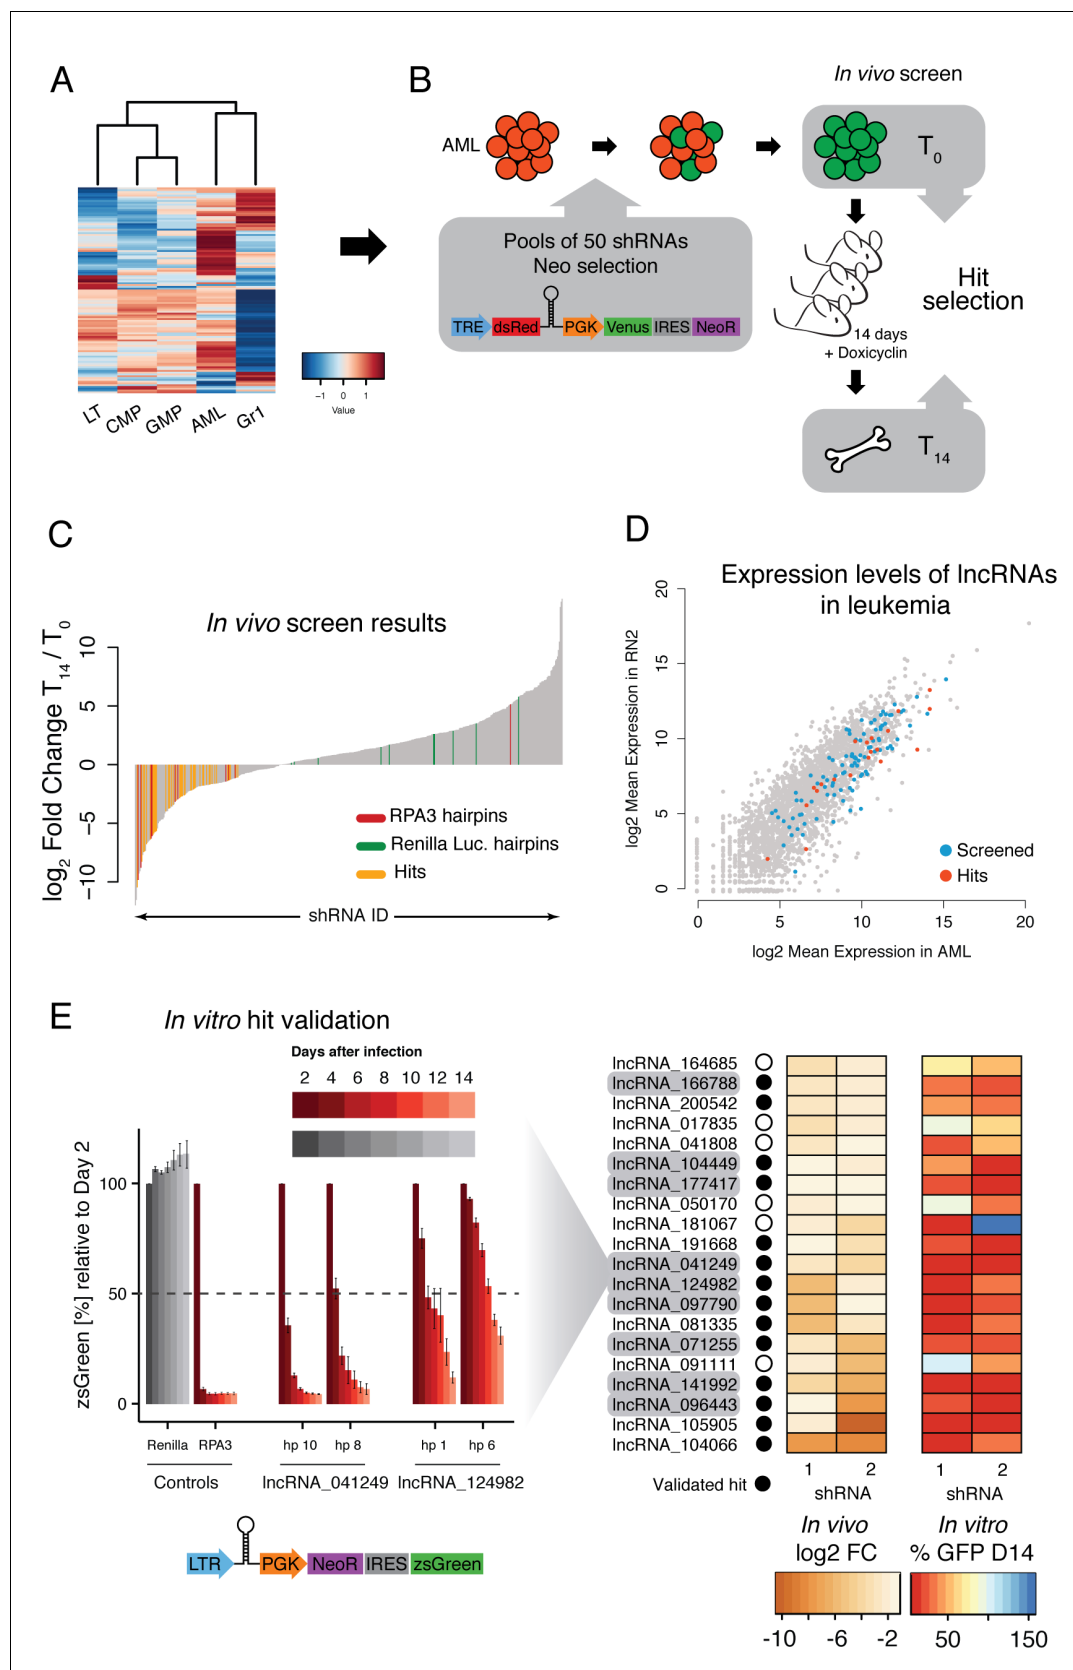

**Figure 4.** An in vivo shRNA screen identifies lncRNAs required for leukemia progression. (A) Expression profile for the lncRNAs included in the screen. (B) Screen outline: murine MLL-AF9/NRAS<sup>G12D</sup> AML cells were infected at low MOI with retrovirus-encoded pools of 50 shRNAs against candidate lncRNAs. (C) In vivo screen results. (D) Expression levels of lncRNAs in leukemia. (E) In vitro hit validation.

*Figure 4 continued*

lncRNAs. Cells were selected to 100% infection and injected into sub-lethally irradiated mice (3–4 mice per pool, 1 million cells per mice). Hairpin abundance was estimated by high-throughput sequencing of genomic DNA from the initial injection pools and from whole bone marrow 14 days post-injection. (C) Fold change between final and injection time points for each hairpin in the screen. Renilla luciferase and *Rpa3* hairpins are highlighted in green and red, respectively. Hairpins of lncRNAs identified as hits are highlighted in yellow. (D) Scatterplot of mean lncRNA expression across two biological replicates in sorted bone marrow AML cells and in vitro culture AML cells. Screened lncRNA and hits are highlighted in blue and red, respectively. (E) One-by-one in vitro competition assay. AML cells were infected with a retrovirus constitutively expressing a single shRNA targeting the indicated lncRNA candidate. The percentage of zsGreen-positive cells relative to day 2 post-infection was followed over the course of 14 days. Bar graphs for controls and two representative lncRNAs (with two hairpins per lncRNA) are shown on the left. Values are the average of four biological replicates; error bars show s.e.m. A summary of the in vivo fold change and the percentage of zsGreen at the latest time point in vitro for all lncRNA hits are shown on the right displayed as a heat map.

DOI: <https://doi.org/10.7554/eLife.25607.008>

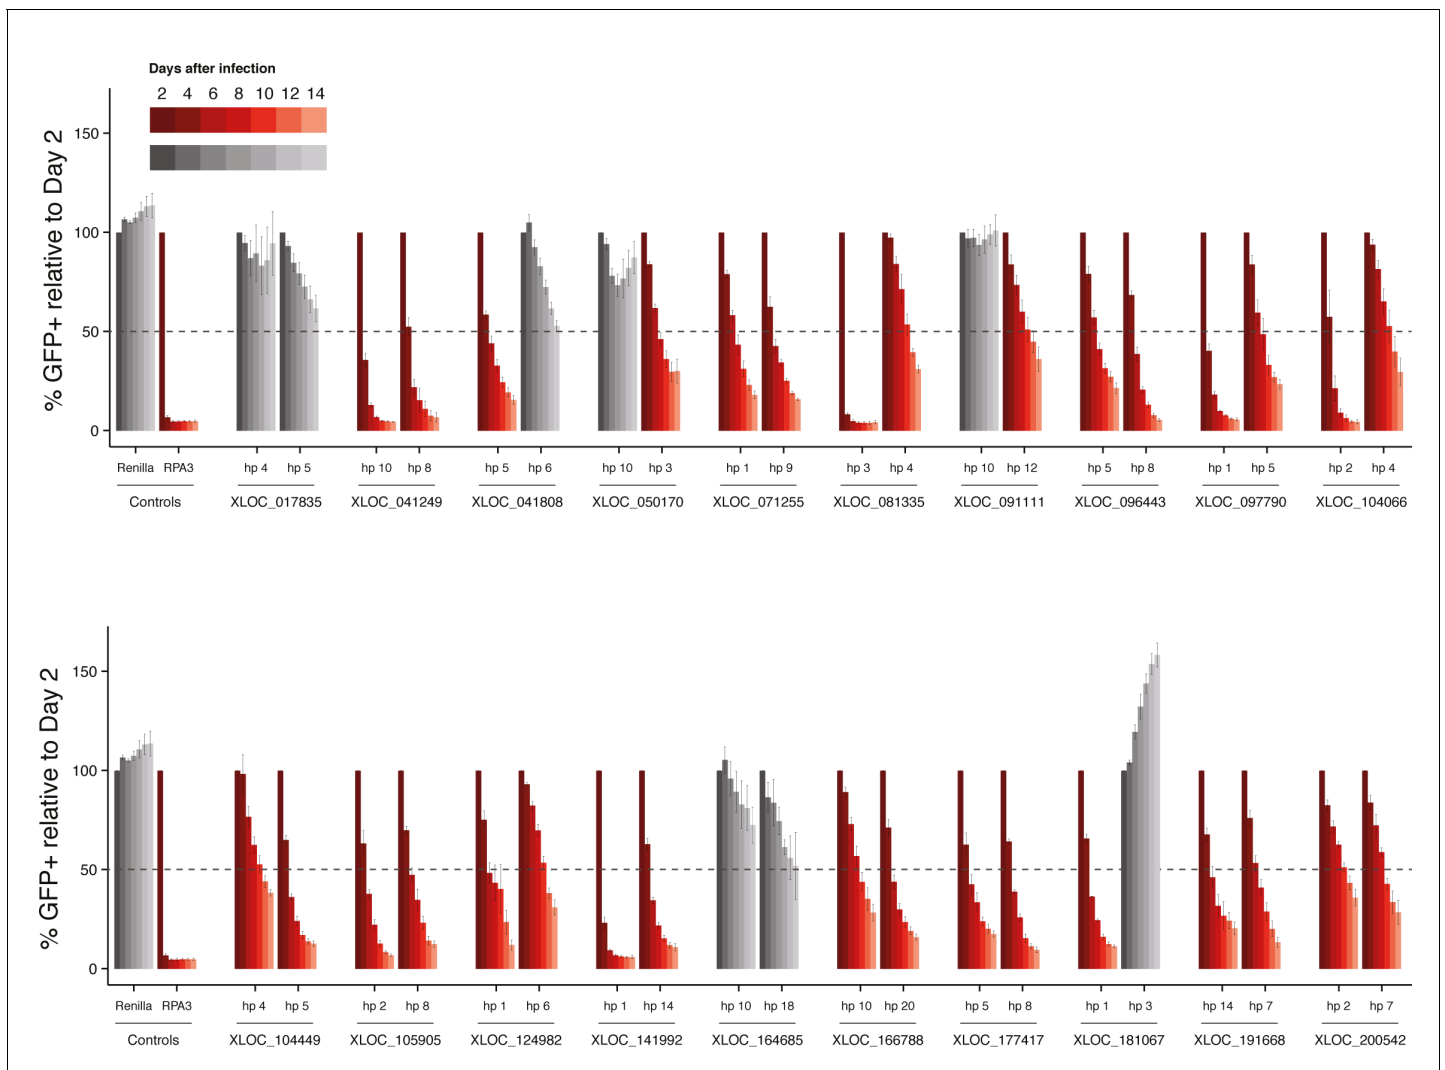

**Figure 4—figure supplement 1.** Competitive proliferation assays for all the lncRNAs identified as hits in the in vivo screen, with two hairpins per lncRNA. Percentage of fluorescence cells is normalized to day 2 after infection. Hairpins that produced over 50% depletion are highlighted in red. Values are the mean of four biological replicates, error bars represent s.e.m.

DOI: <https://doi.org/10.7554/eLife.25607.009>

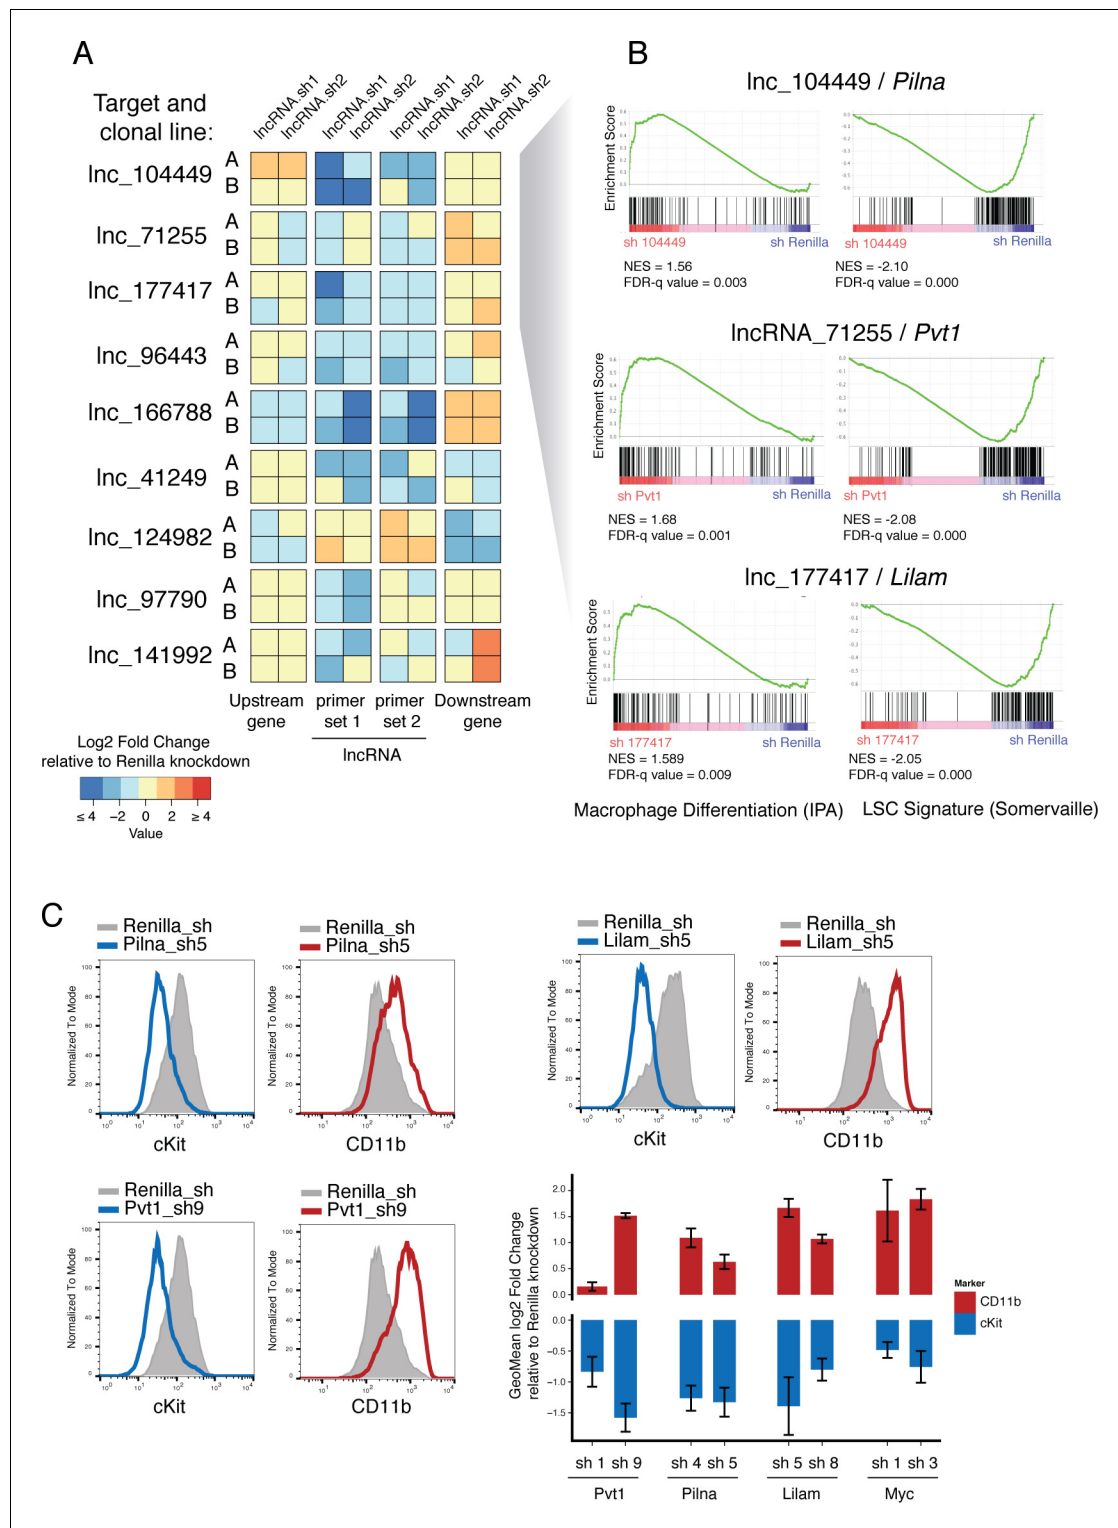

**Figure 5.** Characterization of top validated candidate lncRNAs. (A) Summary qPCR data shown as log2 fold change expression relative to Renilla Luciferase knockdown. Average values shown as a heatmap from three biological replicates (independent dox inductions) and two independent clonal cell lines. Relative expression was calculated as delta delta Cq using *Gapdh* as reference. For each lncRNA knockdown (rows), relative expression for the lncRNA itself, and its upstream and downstream genes are shown (columns). (B) Enrichment for Macrophage Differentiation (Ingenuity Pathway Analysis gene set) and Leukemia Stem cell Signature (*Krivtsov et al., 2006*) gene sets upon lncRNA knockdown was performed using Gene Set Enrichment Analysis. (C) Flow cytometry analysis of cKit and CD11b (Mac-1) surface markers upon lncRNA or Renilla knockdown. A representative plot Figure 5 continued on next page

*Figure 5 continued*

per lncRNA is shown on the left. Geometric Mean fold change relative to Renilla knockdown is shown as the average of four biological replicates. Error bars represent s.e.m.

DOI: <https://doi.org/10.7554/eLife.25607.010>

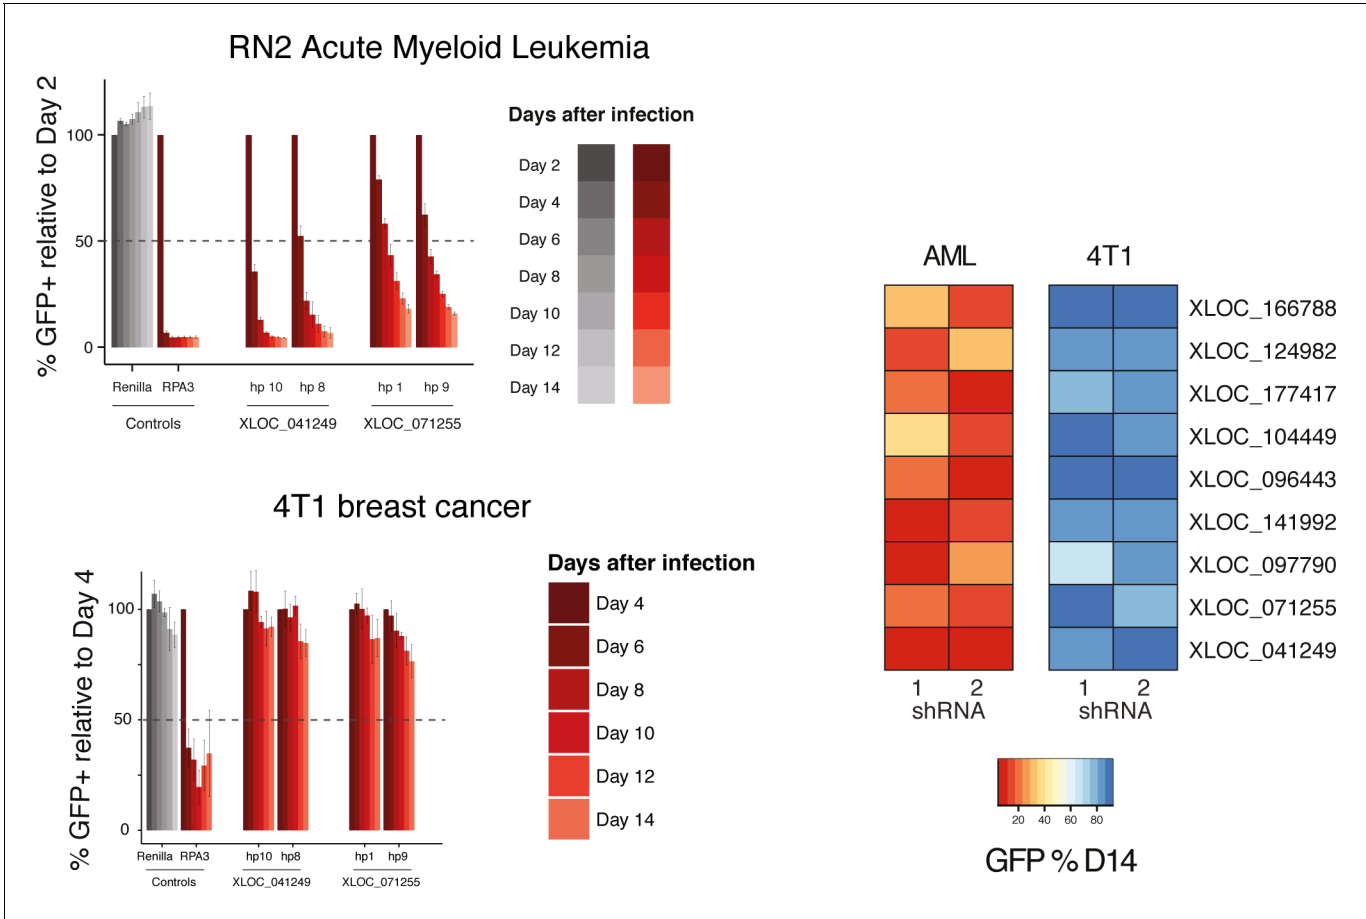

**Figure 5—figure supplement 1.** Validated lncRNA hits are not generally required for proliferation. Representative proliferation assays bar plots for AML and breast cancer cell lines (left). Heat map representing normalized depletion by day 14 after infection for the nine lncRNAs that were further analyzed (right).

DOI: <https://doi.org/10.7554/eLife.25607.011>



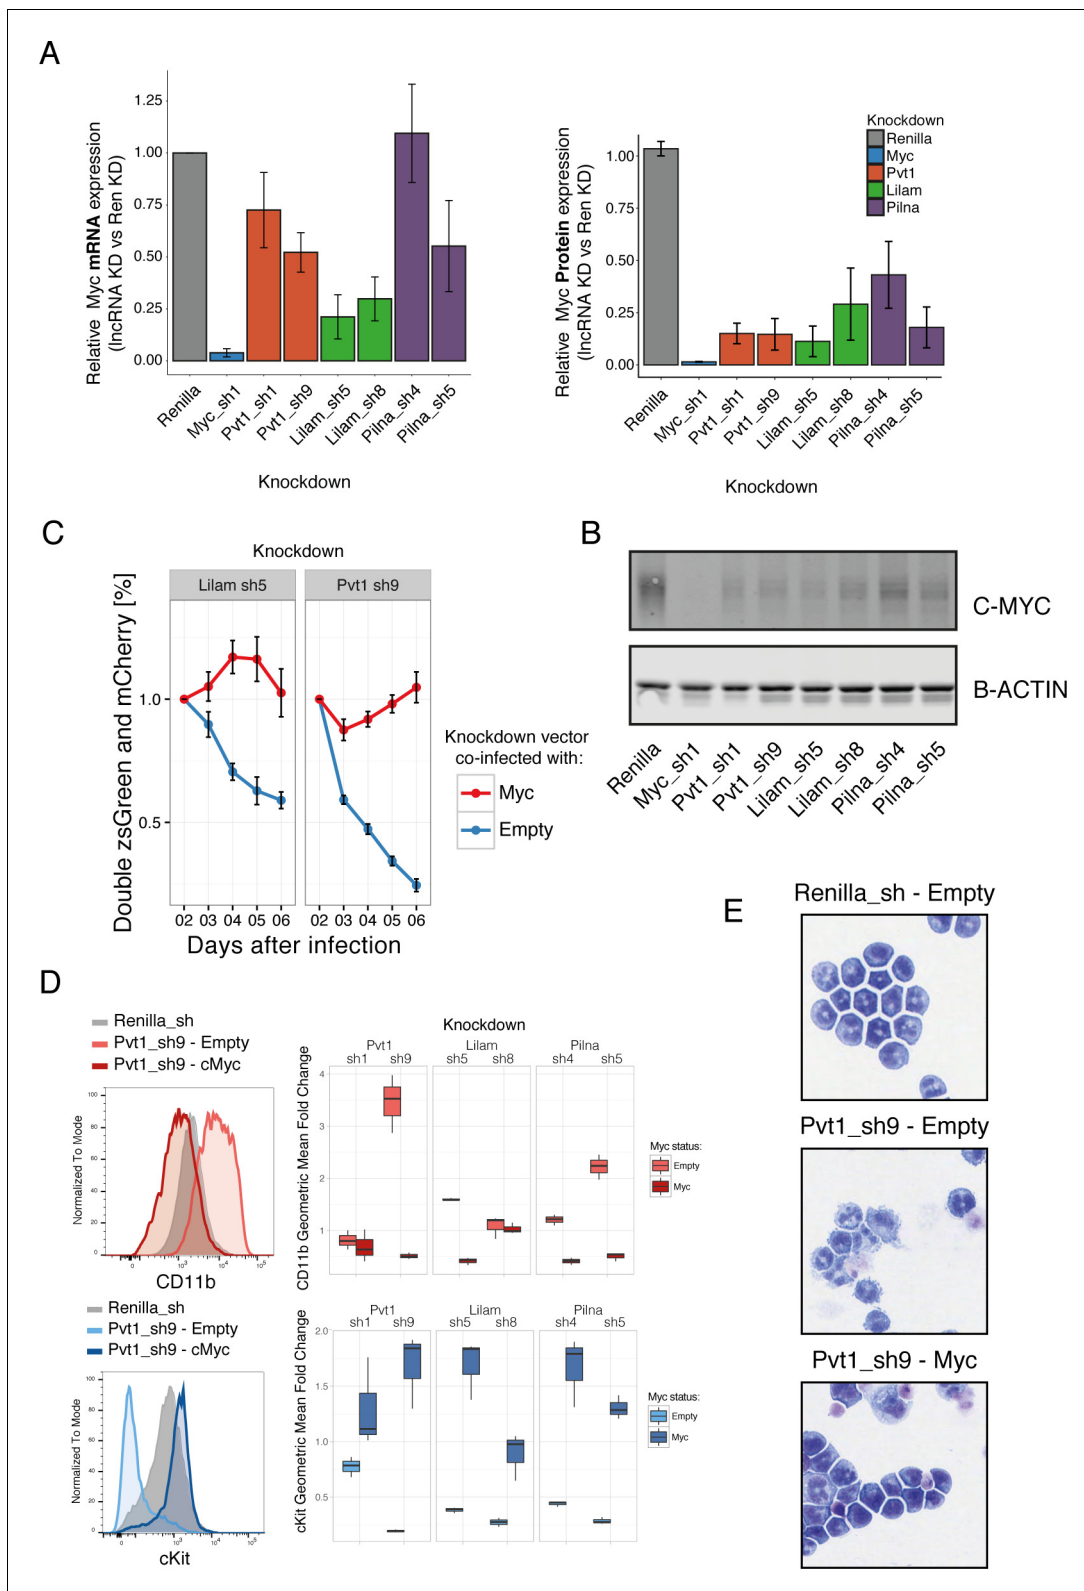

**Figure 6.** Three 'leukemia lncRNAs' affect MYC and enforced expression of this oncogene rescues proliferation and differentiation effects. (A) Relative MYC mRNA and MYC protein. Values represent the mean across three biological replicates, error bars represent s.e.m. (B) A representative western blot from (A). (C) Percentage of cells co-expressing either a constitutive shRNA vector (zsGreen) and a MSCV-based vector expressing mCherry and either Myc or empty. Data is relative to day 2 after infection. Average values across three replicates shown, error bars represent s.e.m. (D) Figure 6 continued on next page

*Figure 6 continued*

Immunophenotyping of AML cells expressing either an inducible Renilla shRNA vector, co-expressing lncRNA Pvt1 knockdown and MYC or lncRNA knockdown without MYC (empty). On the right, quantification of the relative expression compared to Renilla is shown as fold change of the geometric mean for each fluorophore. Data obtained from three biological replicates. (E) Wright-Giemsa staining of cytopun cells expressing the indicated inducible shRNA vectors with or without MYC.

DOI: <https://doi.org/10.7554/eLife.25607.012>

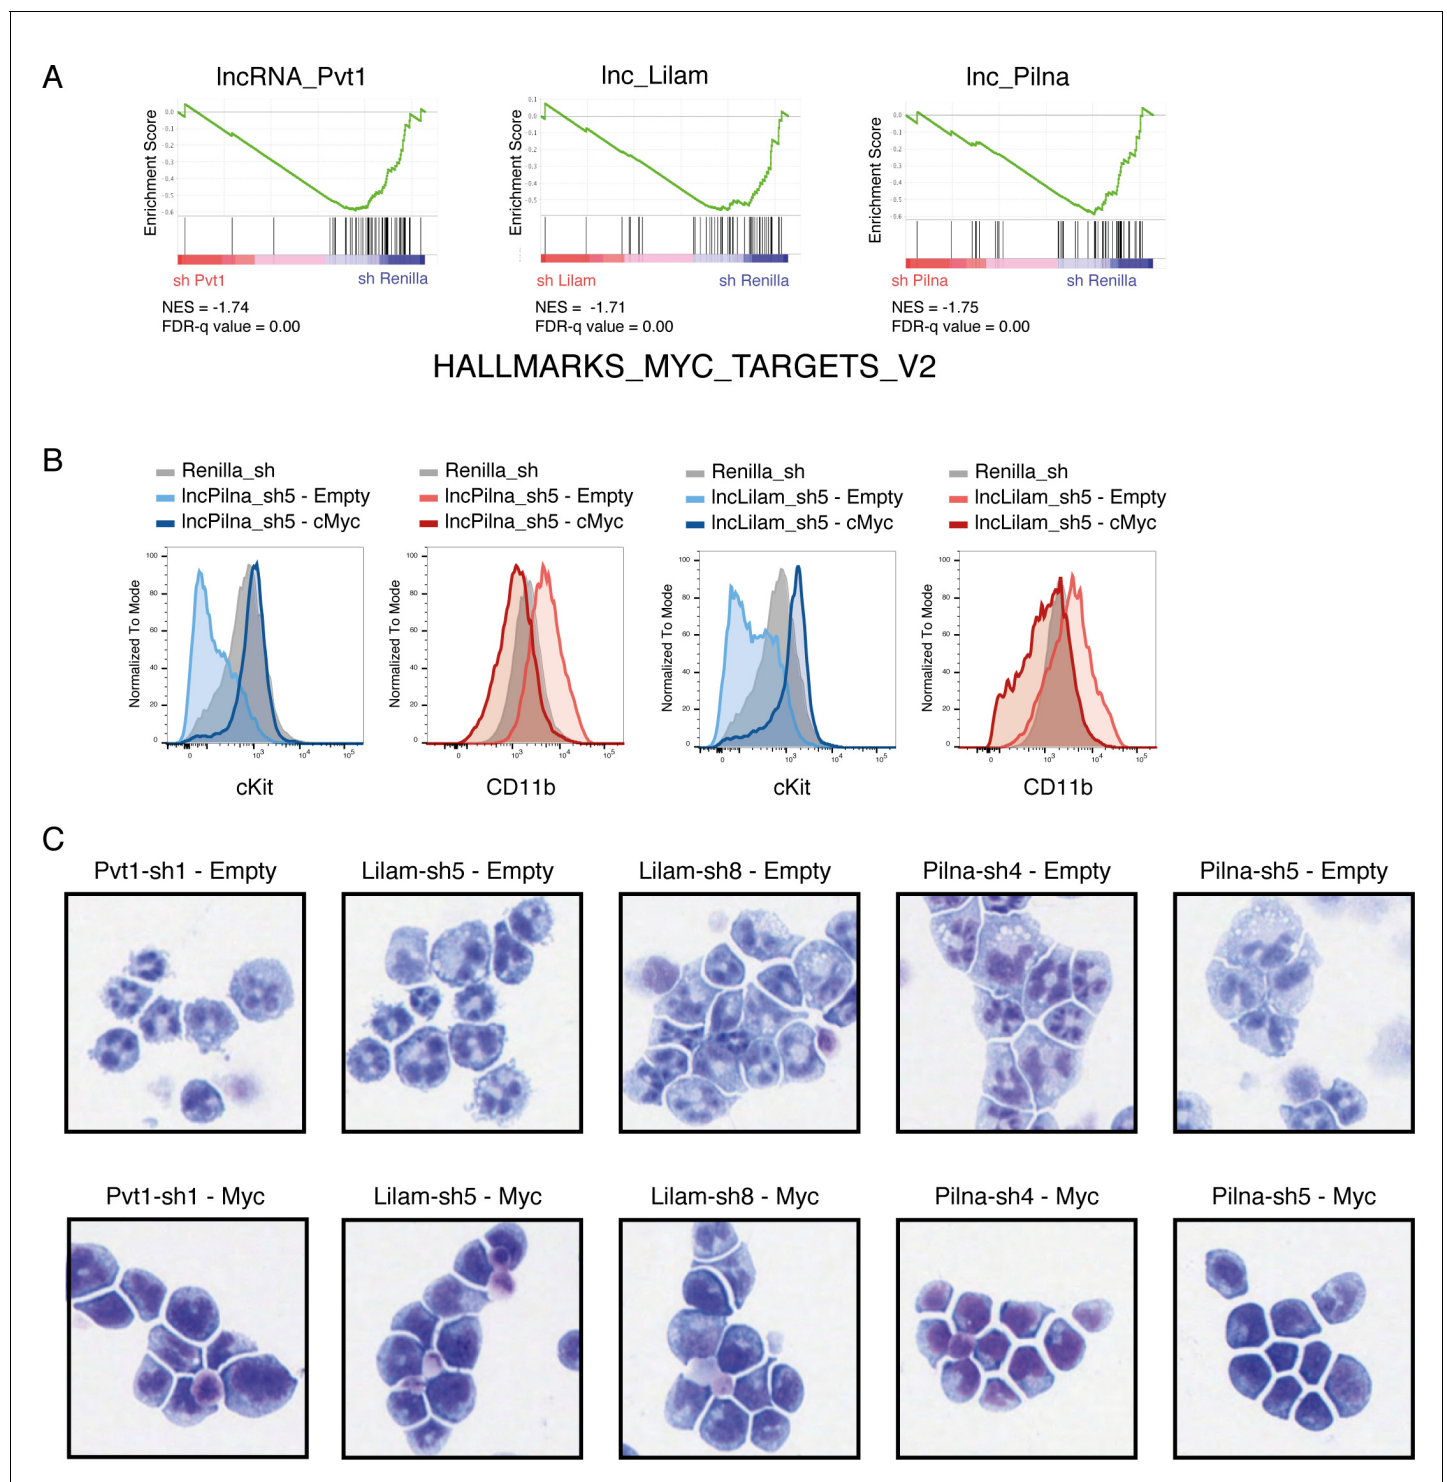

**Figure 6—figure supplement 1.** Myc target genes are affected by lncRNA knockdown and enforced Myc expression rescues the differentiation phenotype. (A) GSEA for Myc target genes in lncRNA versus control knockdown transcriptome data. (B) Flow cytometry plots for immunophenotyping of AML cells expressing the indicated knockdowns with or without MYC. (C) Wright-Giemsa staining for cells expressing the indicated constructs.

DOI: <https://doi.org/10.7554/eLife.25607.013>

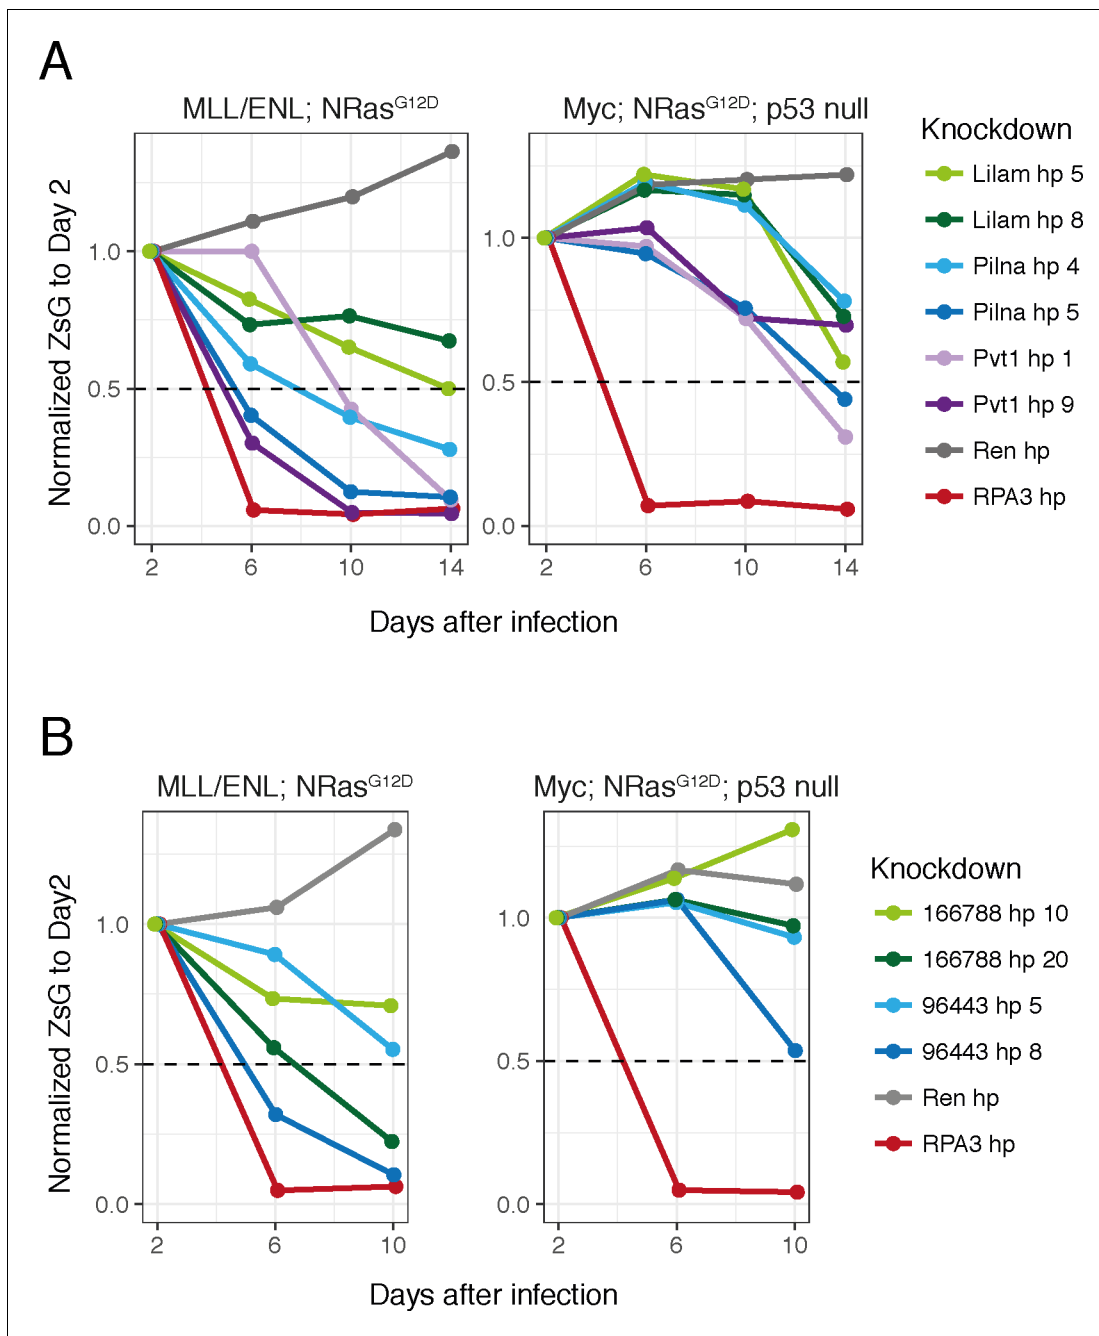

**Figure 6—figure supplement 2.** IncRNA requirements in other AML models. Proliferation assays in two other AML models for our three most characterized IncRNAs (Lilam, Pilna and Pvt1) (A) and two additional IncRNAs from our validated set (B).

DOI: <https://doi.org/10.7554/eLife.25607.014>

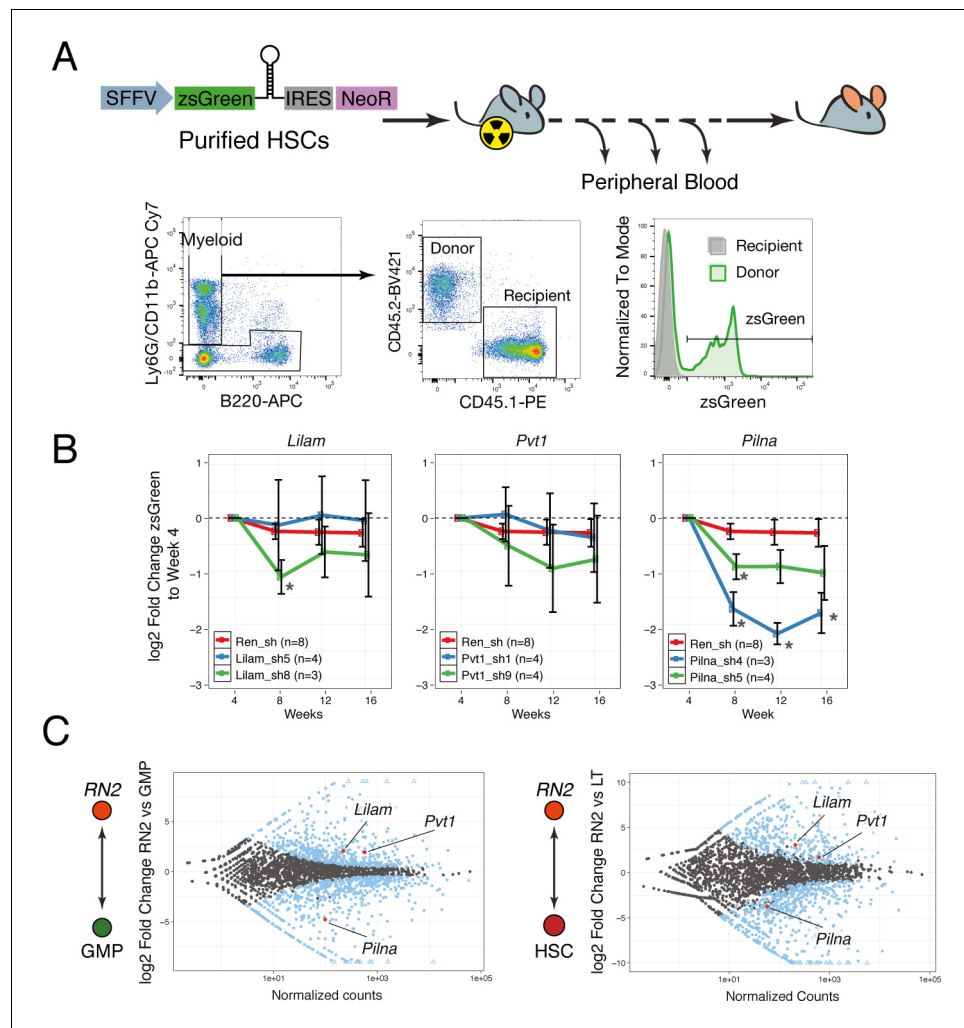

**Figure 7.** IncRNAs Pvt1 and Lilam are miss-regulated in leukemia while Pilna is required for myeloid reconstitution. (A) Outline of the peripheral blood analysis following bone marrow transplantation. (B) Relative zsGreen percentage to week 4 values. Values of zsGreen represent percentage within donor (CD45.2 +) for the myeloid compartment. Average log<sub>2</sub> fold change shown, error bars represent s.e.m. Statistical significance was calculated using the Mann-Whitney/Wilcoxon Rank Sum Test (\* p-value<0.05). (C) Relative expression of IncRNAs between leukemia cells (RN2) and two normal progenitor cells types, GMP (left) and LT-HSC (right) versus normalized read counts. Log<sub>2</sub> fold change and normalized read counts obtained using DESeq2. Blue dots depict differentially expressed lncRNAs (FDR < 0.05), lncRNAs of interest are highlighted in red.

DOI: <https://doi.org/10.7554/eLife.25607.015>
