# Supplementary material for: lncRNA requirements for mouse acute myeloid leukemia and normal differentiation
Source: eLife. 2017 Sep 6;6:e25607. doi: 10.7554/eLife.25607 (PMC5619947; doi:10.7554/eLife.25607)
Supplement: Supplementary file 2. [file elife-25607-supp2.xls]

## Sheet: AML-vs-rest
XLOC_104261,XLOC_105315
XLOC_050273
XLOC_140910
XLOC_152363
XLOC_189660,XLOC_191252
XLOC_088474
XLOC_225846
XLOC_018844
XLOC_141992
XLOC_018069
XLOC_124603
XLOC_140519
XLOC_005131
XLOC_114225
XLOC_062996
XLOC_072261
XLOC_177417
XLOC_060361
XLOC_154478
XLOC_073321
XLOC_051676
XLOC_124943
XLOC_189481
XLOC_072124
XLOC_016632
XLOC_163829
XLOC_097095
XLOC_050579
XLOC_154211
XLOC_073273
XLOC_081835
XLOC_128242
XLOC_018248
XLOC_097131
XLOC_113027
XLOC_112798
XLOC_153185
XLOC_165247
XLOC_017440
XLOC_109568
XLOC_039685
XLOC_127179
XLOC_090844
XLOC_153918
XLOC_190265
XLOC_040020
XLOC_214843
XLOC_080378,XLOC_081510
XLOC_190666
XLOC_089347
XLOC_061268
XLOC_125913
XLOC_201234
XLOC_049830
XLOC_039888,XLOC_041590
XLOC_154682
XLOC_111077,XLOC_113934
XLOC_154907
XLOC_089704
XLOC_002980
XLOC_163881
XLOC_111152
XLOC_027911,XLOC_030312
XLOC_153132
XLOC_139787
XLOC_213581
XLOC_155055
XLOC_179866
XLOC_080592
XLOC_154277
XLOC_114039
XLOC_114507
XLOC_140607
XLOC_039424
XLOC_088306
XLOC_127038
XLOC_192221
XLOC_104414,XLOC_105449
XLOC_051017
XLOC_201470
XLOC_111479
XLOC_049311
XLOC_041330
XLOC_019328
XLOC_211385
XLOC_153823
XLOC_061031
XLOC_060301
XLOC_154197
XLOC_200720
XLOC_032288
XLOC_141915
XLOC_192260
XLOC_190795
XLOC_073324
XLOC_167288
XLOC_005437
XLOC_125789
XLOC_139102
XLOC_141740
XLOC_016469
XLOC_097754
XLOC_081899
XLOC_142412
XLOC_127926
XLOC_051390
XLOC_201386
XLOC_028776
XLOC_017835
XLOC_125594
XLOC_038962
XLOC_124629
XLOC_040540
XLOC_114011
XLOC_109734
XLOC_181504
XLOC_141502
XLOC_039826
XLOC_167327
XLOC_073294
XLOC_192215
XLOC_163560
XLOC_081495
XLOC_005242
XLOC_016408
XLOC_109977
XLOC_125004
XLOC_201482
XLOC_071035
XLOC_214983
XLOC_213676
XLOC_090162
XLOC_164147
XLOC_166290
XLOC_000693
XLOC_039044
XLOC_019168
XLOC_152714
XLOC_110208
XLOC_152117
XLOC_112637
XLOC_019137
XLOC_212920
XLOC_126983
XLOC_112957
XLOC_212890
XLOC_060975
XLOC_030456
XLOC_201006
XLOC_201861
XLOC_080165,XLOC_081335
XLOC_125670
XLOC_114569
XLOC_097781
XLOC_166631
XLOC_098124
XLOC_202840
XLOC_200539
XLOC_124954
XLOC_166788
XLOC_111795
XLOC_039130
XLOC_190251
XLOC_190086
XLOC_178456
XLOC_030183
XLOC_178411
XLOC_181489
XLOC_001806
XLOC_017961
XLOC_039087
XLOC_143127
XLOC_104066
XLOC_051458
XLOC_201356
XLOC_190873
XLOC_018436
XLOC_213219
XLOC_019327
XLOC_191572
XLOC_060221
XLOC_001214
XLOC_070828
XLOC_030124
XLOC_038810
XLOC_176607
XLOC_125518
XLOC_126017
XLOC_004236
XLOC_112785
XLOC_176600
XLOC_140241
XLOC_079680
XLOC_001426
XLOC_004912
XLOC_041567
XLOC_062560
XLOC_060662
XLOC_097544
XLOC_042068
XLOC_190686
XLOC_126009
XLOC_049767
XLOC_152290
XLOC_091156
XLOC_029128
XLOC_177210
XLOC_109444
XLOC_004375
XLOC_200448
XLOC_202729
XLOC_104315
XLOC_152014
XLOC_143235
XLOC_003771

## Sheet: HSC-vs-rest
XLOC_089392,XLOC_090969
XLOC_004771
XLOC_063102
XLOC_096429
XLOC_096408
XLOC_028886
XLOC_089475
XLOC_105722
XLOC_070879
XLOC_154045
XLOC_141371
XLOC_030427
XLOC_040046
XLOC_163803
XLOC_072433
XLOC_004996
XLOC_189604
XLOC_212516
XLOC_038866
XLOC_039289
XLOC_028673
XLOC_190815
XLOC_016208
XLOC_030091,XLOC_032501
XLOC_178515
XLOC_032443
XLOC_113819
XLOC_072768
XLOC_191740
XLOC_052290
XLOC_203386
XLOC_211790,XLOC_214152
XLOC_190167
XLOC_200782
XLOC_125675,XLOC_127800
XLOC_113174
XLOC_062805
XLOC_201727
XLOC_143126
XLOC_154576
XLOC_151961,XLOC_154046
XLOC_062715
XLOC_154434
XLOC_139956
XLOC_080921
XLOC_111863
XLOC_088593
XLOC_088690
XLOC_028180
XLOC_177835
XLOC_001218,XLOC_004116
XLOC_088498
XLOC_163791
XLOC_166773
XLOC_040150
XLOC_151899
XLOC_031841
XLOC_167252
XLOC_089343,XLOC_090908
XLOC_089473
XLOC_140187
XLOC_017427
XLOC_031582
XLOC_041184
XLOC_177082
XLOC_126134
XLOC_030030
XLOC_049862
XLOC_142570
XLOC_051145
XLOC_191610
XLOC_089476
XLOC_140673
XLOC_177438,XLOC_180342
XLOC_017588
XLOC_090335
XLOC_003349
XLOC_040884
XLOC_072863
XLOC_028068
XLOC_200701,XLOC_202739

## Sheet: lymphoid-enriched
XLOC_001824
XLOC_030735
XLOC_081084
XLOC_166527
XLOC_039178
XLOC_018730
XLOC_029604
XLOC_004566
XLOC_153385
XLOC_040263
XLOC_071962
XLOC_030734
XLOC_126515
XLOC_002435
XLOC_210938
XLOC_105092
XLOC_141211
XLOC_096673
XLOC_051441
XLOC_089453
XLOC_050743
XLOC_189689
XLOC_070864
XLOC_061150,XLOC_062669
XLOC_004955
XLOC_060274
XLOC_154331
XLOC_140228
XLOC_190146
XLOC_163953
XLOC_165066
XLOC_029384
XLOC_178208
XLOC_028384
XLOC_105665
XLOC_050740
XLOC_200592
XLOC_104221
XLOC_128101
XLOC_002301
XLOC_005153
XLOC_080016,XLOC_081199
XLOC_201446
XLOC_001822
XLOC_104369
XLOC_039636
XLOC_199888
XLOC_111374
XLOC_110772
XLOC_200237
XLOC_155172
XLOC_073180
XLOC_176817
XLOC_110357
XLOC_071983
XLOC_001097
XLOC_050550
XLOC_200485
XLOC_166475
XLOC_138976
XLOC_151835
XLOC_201961
XLOC_180581
XLOC_001179
XLOC_040215
XLOC_203046
XLOC_125559
XLOC_109608
XLOC_088668
XLOC_138775
XLOC_016669,XLOC_018581
XLOC_016659,XLOC_018572
XLOC_080513
XLOC_163951
XLOC_062699
XLOC_080293
XLOC_016654,XLOC_018568
XLOC_071727
XLOC_104597
XLOC_096919
XLOC_088228
XLOC_201797,XLOC_203780
XLOC_165654
XLOC_004717
XLOC_141605
XLOC_001769
XLOC_079897
XLOC_061109
XLOC_109833
XLOC_060680
XLOC_039564
XLOC_124810
XLOC_166434
XLOC_000448
XLOC_105656
XLOC_152396
XLOC_138985
XLOC_040490
XLOC_178189
XLOC_001192
XLOC_191594
XLOC_018554
XLOC_166178
XLOC_191768
XLOC_029424
XLOC_081234
XLOC_004716
XLOC_113985
XLOC_049970
XLOC_005326
XLOC_073057
XLOC_097636
XLOC_052239
XLOC_029078
XLOC_141613
XLOC_189489,XLOC_191047
XLOC_112026
XLOC_128256
XLOC_051586
XLOC_153112,XLOC_155119
XLOC_018590
XLOC_000449
XLOC_105142
XLOC_128123
XLOC_071851
XLOC_166482
XLOC_138771
XLOC_097907
XLOC_040332
XLOC_127373
XLOC_097354
XLOC_127341
XLOC_111892
XLOC_051549
XLOC_089353
XLOC_141503
XLOC_019148
XLOC_001096
XLOC_110648
XLOC_140405
XLOC_127394
XLOC_189983
XLOC_072611
XLOC_081095
XLOC_203353
XLOC_040258
XLOC_201914
XLOC_089364
XLOC_164477
XLOC_050652
XLOC_154903
XLOC_060142
XLOC_124517
XLOC_060266
XLOC_110967
XLOC_062367
XLOC_071245
XLOC_016199,XLOC_018116
XLOC_029755
XLOC_028914
XLOC_176702
XLOC_138983
XLOC_073001
XLOC_167321
XLOC_029331
XLOC_017540
XLOC_081544
XLOC_018553
XLOC_062813
XLOC_202094
XLOC_127372
XLOC_112407
XLOC_088085
XLOC_049864
XLOC_214159
XLOC_019521
XLOC_080960
XLOC_004761
XLOC_166140
XLOC_191566
XLOC_112056,XLOC_114974
XLOC_017770
XLOC_049375
XLOC_091196
XLOC_001949
XLOC_140337,XLOC_142751
XLOC_072383
XLOC_049817
XLOC_060190
XLOC_019496
XLOC_002296
XLOC_200697,XLOC_202736
XLOC_016368
XLOC_191412
XLOC_051357
XLOC_016337
XLOC_165099
XLOC_017714
XLOC_213474
XLOC_091099
XLOC_110809,XLOC_113671
XLOC_104371
XLOC_104961
XLOC_124836
XLOC_029340
XLOC_151336,XLOC_153461
XLOC_189968
XLOC_201967
XLOC_104162
XLOC_114319
XLOC_004438
XLOC_165068
XLOC_153953
XLOC_071239
XLOC_125993
XLOC_000260
XLOC_110279
XLOC_005506
XLOC_153110
XLOC_005059
XLOC_125085
XLOC_200108,XLOC_202085
XLOC_178204
XLOC_105240
XLOC_049930
XLOC_002246
XLOC_154562
XLOC_125734
XLOC_165067
XLOC_124875
XLOC_060126
XLOC_181121
XLOC_071814
XLOC_166233
XLOC_127454
XLOC_089549,XLOC_091195
XLOC_214168
XLOC_028149,XLOC_030498
XLOC_179469
XLOC_140958
XLOC_098031
XLOC_019604
XLOC_191876
XLOC_089189
XLOC_125242
XLOC_096559
XLOC_105242
XLOC_003731
XLOC_061874
XLOC_152701
XLOC_112598
XLOC_002211
XLOC_154551
XLOC_201928
XLOC_002838
XLOC_072501
XLOC_049975,XLOC_051565
XLOC_151651
XLOC_039013
XLOC_125847
XLOC_141995
XLOC_041657
XLOC_112582
XLOC_140731,XLOC_143145
XLOC_127084
XLOC_142878
XLOC_110663

## Sheet: progenitor-vs-differentiated
XLOC_114471
XLOC_098073
XLOC_166791
XLOC_029506
XLOC_001235
XLOC_191842
XLOC_212544
XLOC_109610,XLOC_112436
XLOC_081339
XLOC_143083
XLOC_126140
XLOC_032507
XLOC_071249
XLOC_201736
XLOC_154961
XLOC_191610
XLOC_089569
XLOC_112454
XLOC_166788
XLOC_138591
XLOC_127611
XLOC_003730
XLOC_091114
XLOC_151941
XLOC_167199
XLOC_041808
XLOC_089476
XLOC_031841
XLOC_201692
XLOC_019274
XLOC_016414,XLOC_018334
XLOC_114569
XLOC_114479
XLOC_127563
XLOC_124347
XLOC_212583
XLOC_127905
XLOC_088388,XLOC_089907
XLOC_030427
XLOC_029356
XLOC_152231
XLOC_153132
XLOC_088457
XLOC_211790,XLOC_214152
XLOC_152384,XLOC_154482
XLOC_002256
XLOC_080842,XLOC_080844,XLOC_082026,XLOC_082027
XLOC_212804
XLOC_071095
XLOC_114451
XLOC_032509
XLOC_163921
XLOC_151164
XLOC_002218
XLOC_030015
XLOC_029276
XLOC_128334
XLOC_062400
XLOC_081034
XLOC_001900,XLOC_004688
XLOC_089751
XLOC_029329
XLOC_142938
XLOC_030700
XLOC_154197
XLOC_166773
XLOC_164342,XLOC_166374
XLOC_018488
XLOC_211233
XLOC_080921
XLOC_105424
XLOC_213024
XLOC_089347
XLOC_152392
XLOC_189604
XLOC_060891
XLOC_200782
XLOC_003771
XLOC_105722
XLOC_031097
XLOC_088543,XLOC_090067
XLOC_114519
XLOC_141406
XLOC_152213,XLOC_154309,XLOC_154310
XLOC_167288
XLOC_154277
XLOC_152283
XLOC_201994
XLOC_112785
XLOC_164149
XLOC_167344
XLOC_143126
XLOC_080518
XLOC_071547
XLOC_138542
XLOC_071479
XLOC_002960
XLOC_190352
XLOC_097131
XLOC_179342
XLOC_203766
XLOC_105137
XLOC_212502
XLOC_090279
XLOC_105591
XLOC_212228
XLOC_110812
XLOC_028068
XLOC_072695
XLOC_164062
XLOC_152391
XLOC_190455
XLOC_112751
XLOC_113226
XLOC_152014
XLOC_114846
XLOC_030915
XLOC_141225
XLOC_180121
XLOC_088508
XLOC_090928
XLOC_164053
XLOC_140624
XLOC_138870
XLOC_029131
XLOC_177079
XLOC_139919
XLOC_030123
XLOC_071716
XLOC_016482
XLOC_140281
XLOC_126134
XLOC_080688
XLOC_073151
XLOC_200171
XLOC_060825
XLOC_177294
XLOC_189167
XLOC_139103,XLOC_141543
XLOC_104082
XLOC_032550
XLOC_090237
XLOC_210590
XLOC_211807
XLOC_139606,XLOC_141962
XLOC_096443,XLOC_097487
XLOC_073440
XLOC_163838
XLOC_028522
XLOC_124166
XLOC_110043
XLOC_139950
XLOC_060267
XLOC_178399
XLOC_202704
XLOC_140287
XLOC_004236
XLOC_179331
XLOC_177293
XLOC_104979
XLOC_214013
XLOC_213453
XLOC_189798
XLOC_032508
XLOC_214162
XLOC_089409
XLOC_004927
XLOC_029128
XLOC_071136
XLOC_190815
XLOC_191016
XLOC_088730
XLOC_163765
XLOC_192260
XLOC_032288
XLOC_164941
XLOC_039432
XLOC_030456
XLOC_061772
XLOC_111018,XLOC_113861
XLOC_113225
XLOC_139664,XLOC_142040
XLOC_073003
XLOC_001492
XLOC_080587
XLOC_179465
XLOC_060246,XLOC_061857
XLOC_089475
XLOC_154727
XLOC_164174
XLOC_189158
XLOC_091226
XLOC_152869
XLOC_081495
XLOC_203202
XLOC_154576
XLOC_190138,XLOC_191706
XLOC_041704
XLOC_038751
XLOC_028725
XLOC_176627
XLOC_061078
XLOC_210971
XLOC_125594
XLOC_103984
XLOC_002001
XLOC_039837
XLOC_030258
XLOC_163615
XLOC_060994,XLOC_062525
XLOC_114039
XLOC_152404
XLOC_028886
XLOC_031821
XLOC_143127
XLOC_190545
XLOC_049892
XLOC_200620
XLOC_080892
XLOC_152443
XLOC_089864
XLOC_112487
XLOC_142800
XLOC_049924
XLOC_052182
XLOC_052290
XLOC_089313
XLOC_028890
XLOC_214161
XLOC_165915
XLOC_089918
XLOC_051506
XLOC_152533
XLOC_028844
XLOC_060221
XLOC_201603
XLOC_061147
XLOC_140532
XLOC_028153
XLOC_128399
XLOC_001290
XLOC_214972
XLOC_049768
XLOC_203520
XLOC_016893
XLOC_112687
XLOC_125497
XLOC_114395
XLOC_031593
XLOC_088244
XLOC_089473
XLOC_002407
XLOC_080424
XLOC_104562
XLOC_180036
XLOC_164942
XLOC_017961
XLOC_154211
XLOC_190726
XLOC_125004
XLOC_088162
XLOC_166290
XLOC_151706
XLOC_177172
XLOC_164695
XLOC_203160
XLOC_040310
XLOC_154756
XLOC_028776
XLOC_165578
XLOC_017835
XLOC_051856
XLOC_153159
XLOC_097165
XLOC_154045
XLOC_060301
XLOC_062715
XLOC_127784
XLOC_110208
XLOC_080176
XLOC_097047
XLOC_096631
XLOC_018541
XLOC_142799
XLOC_105590
XLOC_004719
XLOC_029278
XLOC_165650
XLOC_029283
XLOC_112540
XLOC_002823
XLOC_126044
XLOC_019774
XLOC_151961,XLOC_154046
XLOC_141371
XLOC_214197
XLOC_152442
XLOC_017968
XLOC_112528
XLOC_050624
XLOC_153235
XLOC_027859
XLOC_151331
XLOC_072433
XLOC_071508
XLOC_029519
XLOC_080754
XLOC_125622
XLOC_030091,XLOC_032501
XLOC_040191
XLOC_032297
XLOC_051137
XLOC_050085
XLOC_088976
XLOC_176810
XLOC_039591
XLOC_061825
XLOC_180778
XLOC_096853
XLOC_139721,XLOC_142106
XLOC_202218
XLOC_179393
XLOC_180315
XLOC_140355
XLOC_038866
XLOC_080602
XLOC_002553
XLOC_060819
XLOC_141040
XLOC_181201
XLOC_072863
XLOC_060200
XLOC_152117
XLOC_089218
XLOC_090073
XLOC_019775
XLOC_189369
XLOC_096408
XLOC_142811
XLOC_152545
XLOC_071255
XLOC_001081
XLOC_027914
XLOC_180065
XLOC_001799
XLOC_113661
XLOC_200063
XLOC_040449
XLOC_167217
XLOC_032519
XLOC_126940
XLOC_039685
XLOC_000498
XLOC_088424
XLOC_211385
XLOC_028472
XLOC_201728
XLOC_050332
XLOC_141368
XLOC_125518
XLOC_049280,XLOC_050866
XLOC_128404
XLOC_190251
XLOC_152347
XLOC_028641
XLOC_138541
XLOC_114507
XLOC_030392
XLOC_191472
XLOC_140374
XLOC_016972
XLOC_097754
XLOC_091138
XLOC_002980
XLOC_164794
XLOC_018157
XLOC_164071
XLOC_070879
XLOC_124603
XLOC_126199
XLOC_112258
XLOC_016571
XLOC_019138
XLOC_109611,XLOC_112437
XLOC_128023
XLOC_072768
XLOC_127410
XLOC_028057
XLOC_032510
XLOC_080592
XLOC_125284
XLOC_001218,XLOC_004116
XLOC_000100
XLOC_088646
XLOC_071082
XLOC_032567
XLOC_002930
XLOC_165029,XLOC_167102
XLOC_152371
XLOC_081165
XLOC_017910
XLOC_097129
XLOC_155187
XLOC_019255
XLOC_032149
XLOC_142210
XLOC_050186
XLOC_190103
XLOC_166631
XLOC_019586
XLOC_004202
XLOC_004564
XLOC_190179
XLOC_049792
XLOC_178876
XLOC_017634
XLOC_190265
XLOC_073324
XLOC_140593
XLOC_154857
XLOC_141116
XLOC_060869
XLOC_190088
XLOC_070755
XLOC_176607
XLOC_018265
XLOC_112999
XLOC_017279
XLOC_105373
XLOC_113819
XLOC_127335
XLOC_165231
XLOC_002734
XLOC_088268
XLOC_127694
XLOC_178515
XLOC_141906
XLOC_142158
XLOC_109734
XLOC_203212
XLOC_139949
XLOC_113123
XLOC_104449
XLOC_109616
XLOC_189660,XLOC_191252
XLOC_028845
XLOC_109722
XLOC_001130
XLOC_177027,XLOC_179789
XLOC_201006
XLOC_153049
XLOC_213781
XLOC_167462
XLOC_051786
XLOC_073206
XLOC_165758
XLOC_178456
XLOC_051761
XLOC_214852
XLOC_030176
XLOC_031032
XLOC_189474
XLOC_088254
XLOC_114985
