# Supplementary material for: lncRNA requirements for mouse acute myeloid leukemia and normal differentiation
Source: eLife. 2017 Sep 6;6:e25607. doi: 10.7554/eLife.25607 (PMC5619947; doi:10.7554/eLife.25607)
Supplement: Supplementary file 4. [file elife-25607-supp4.xlsx]

## Sheet: Screened_hairpins
Old_XLOC	hp_number
XLOC_000293	2	TGCTGTTGACAGTGAGCGAGGGACCCCTGTGGTTGAATTATAGTGAAGCCACAGATGTATAATTCAACCACAGGGGTCCCCTGCCTACTGCCTCGGA
XLOC_000293	3	TGCTGTTGACAGTGAGCGAAGGGGTGAGTTGACTATTAAATAGTGAAGCCACAGATGTATTTAATAGTCAACTCACCCCTCTGCCTACTGCCTCGGA
XLOC_000293	4	TGCTGTTGACAGTGAGCGCGGAGTAGTAGCTTGAATGTTATAGTGAAGCCACAGATGTATAACATTCAAGCTACTACTCCATGCCTACTGCCTCGGA
XLOC_000293	17	TGCTGTTGACAGTGAGCGCGCTGAACAAGTCAGATGCAGATAGTGAAGCCACAGATGTATCTGCATCTGACTTGTTCAGCTTGCCTACTGCCTCGGA
XLOC_000305	1	TGCTGTTGACAGTGAGCGCGCACTCCTATCTTCCATTTTATAGTGAAGCCACAGATGTATAAAATGGAAGATAGGAGTGCTTGCCTACTGCCTCGGA
XLOC_000305	3	TGCTGTTGACAGTGAGCGCCAGATGCATCTAACATCATTATAGTGAAGCCACAGATGTATAATGATGTTAGATGCATCTGTTGCCTACTGCCTCGGA
XLOC_000305	5	TGCTGTTGACAGTGAGCGATAAGAAGATCCTCCAATGACATAGTGAAGCCACAGATGTATGTCATTGGAGGATCTTCTTAGTGCCTACTGCCTCGGA
XLOC_000305	9	TGCTGTTGACAGTGAGCGCCAGGAGTGAGACTGTAGTTGATAGTGAAGCCACAGATGTATCAACTACAGTCTCACTCCTGTTGCCTACTGCCTCGGA
XLOC_000305	10	TGCTGTTGACAGTGAGCGCCAGTCTAATGTCTCTCTTCAATAGTGAAGCCACAGATGTATTGAAGAGAGACATTAGACTGTTGCCTACTGCCTCGGA
XLOC_000586	2	TGCTGTTGACAGTGAGCGCTGCCAGGCACCTTGTAAAATATAGTGAAGCCACAGATGTATATTTTACAAGGTGCCTGGCATTGCCTACTGCCTCGGA
XLOC_000586	3	TGCTGTTGACAGTGAGCGATGCTTGCATCAGCTCAACTTATAGTGAAGCCACAGATGTATAAGTTGAGCTGATGCAAGCAGTGCCTACTGCCTCGGA
XLOC_000586	5	TGCTGTTGACAGTGAGCGCCACATGGGTTGTCTCTGTATATAGTGAAGCCACAGATGTATATACAGAGACAACCCATGTGATGCCTACTGCCTCGGA
XLOC_000586	9	TGCTGTTGACAGTGAGCGAAGAAAGTGAGCTGTTCTTTTATAGTGAAGCCACAGATGTATAAAAGAACAGCTCACTTTCTGTGCCTACTGCCTCGGA
XLOC_000586	11	TGCTGTTGACAGTGAGCGAACATGGGTTGTCTCTGTATAATAGTGAAGCCACAGATGTATTATACAGAGACAACCCATGTGTGCCTACTGCCTCGGA
XLOC_000591	1	TGCTGTTGACAGTGAGCGCCAGTAACACGCTGTTGAAACATAGTGAAGCCACAGATGTATGTTTCAACAGCGTGTTACTGATGCCTACTGCCTCGGA
XLOC_000591	3	TGCTGTTGACAGTGAGCGAACAAGACAAGTGCTTTCAAAATAGTGAAGCCACAGATGTATTTTGAAAGCACTTGTCTTGTGTGCCTACTGCCTCGGA
XLOC_000591	4	TGCTGTTGACAGTGAGCGAACTGCTCAAACAAAAAAGGAATAGTGAAGCCACAGATGTATTCCTTTTTTGTTTGAGCAGTGTGCCTACTGCCTCGGA
XLOC_000591	6	TGCTGTTGACAGTGAGCGAAAGTCATTCTATCAAAGCTGATAGTGAAGCCACAGATGTATCAGCTTTGATAGAATGACTTCTGCCTACTGCCTCGGA
XLOC_000591	9	TGCTGTTGACAGTGAGCGCAACTACTATTCTTCTACTGTATAGTGAAGCCACAGATGTATACAGTAGAAGAATAGTAGTTTTGCCTACTGCCTCGGA
XLOC_000753	3	TGCTGTTGACAGTGAGCGAAGCTTCCCTTTGCTCACCCAATAGTGAAGCCACAGATGTATTGGGTGAGCAAAGGGAAGCTGTGCCTACTGCCTCGGA
XLOC_000753	5	TGCTGTTGACAGTGAGCGCCAGGACAAGCATGTCAAACAATAGTGAAGCCACAGATGTATTGTTTGACATGCTTGTCCTGATGCCTACTGCCTCGGA
XLOC_000753	6	TGCTGTTGACAGTGAGCGAACATGCTGTCTTCTCACCCTATAGTGAAGCCACAGATGTATAGGGTGAGAAGACAGCATGTGTGCCTACTGCCTCGGA
XLOC_000753	9	TGCTGTTGACAGTGAGCGCAAGGGATGTGTTTCTGAGTGATAGTGAAGCCACAGATGTATCACTCAGAAACACATCCCTTTTGCCTACTGCCTCGGA
XLOC_000753	10	TGCTGTTGACAGTGAGCGCTGTGAGAGTCTGGACATTTTATAGTGAAGCCACAGATGTATAAAATGTCCAGACTCTCACATTGCCTACTGCCTCGGA
XLOC_001005	1	TGCTGTTGACAGTGAGCGACACGAACTTTCTTGAACTTTATAGTGAAGCCACAGATGTATAAAGTTCAAGAAAGTTCGTGGTGCCTACTGCCTCGGA
XLOC_001005	2	TGCTGTTGACAGTGAGCGCAAGACGATCTGTCTTTCTCTATAGTGAAGCCACAGATGTATAGAGAAAGACAGATCGTCTTATGCCTACTGCCTCGGA
XLOC_001005	4	TGCTGTTGACAGTGAGCGAAGAACCACGAACTTTCTTGAATAGTGAAGCCACAGATGTATTCAAGAAAGTTCGTGGTTCTGTGCCTACTGCCTCGGA
XLOC_001005	5	TGCTGTTGACAGTGAGCGCACCACGAACTTTCTTGAACTATAGTGAAGCCACAGATGTATAGTTCAAGAAAGTTCGTGGTTTGCCTACTGCCTCGGA
XLOC_001005	6	TGCTGTTGACAGTGAGCGATAAGACGATCTGTCTTTCTCATAGTGAAGCCACAGATGTATGAGAAAGACAGATCGTCTTACTGCCTACTGCCTCGGA
XLOC_001185	1	TGCTGTTGACAGTGAGCGATGCTTTCATTCTTAGTACTAATAGTGAAGCCACAGATGTATTAGTACTAAGAATGAAAGCACTGCCTACTGCCTCGGA
XLOC_001185	2	TGCTGTTGACAGTGAGCGATCCCTCTCTTCTTTCCCCTTATAGTGAAGCCACAGATGTATAAGGGGAAAGAAGAGAGGGAGTGCCTACTGCCTCGGA
XLOC_001185	10	TGCTGTTGACAGTGAGCGAACCGATCTTGCTCCCTTTTTATAGTGAAGCCACAGATGTATAAAAAGGGAGCAAGATCGGTCTGCCTACTGCCTCGGA
XLOC_001185	11	TGCTGTTGACAGTGAGCGCCAGGGTCCAGTTTCAATCTAATAGTGAAGCCACAGATGTATTAGATTGAAACTGGACCCTGTTGCCTACTGCCTCGGA
XLOC_001185	12	TGCTGTTGACAGTGAGCGATGAGAGTCTTCTTTAAACTAATAGTGAAGCCACAGATGTATTAGTTTAAAGAAGACTCTCAGTGCCTACTGCCTCGGA
XLOC_001386	4	TGCTGTTGACAGTGAGCGATGTCTACAATCGCTAGTGGTATAGTGAAGCCACAGATGTATACCACTAGCGATTGTAGACAGTGCCTACTGCCTCGGA
XLOC_001386	9	TGCTGTTGACAGTGAGCGACACATGCCACTGTCTACAATATAGTGAAGCCACAGATGTATATTGTAGACAGTGGCATGTGCTGCCTACTGCCTCGGA
XLOC_001386	11	TGCTGTTGACAGTGAGCGCGTCTGTCACTGAGCTACGTCATAGTGAAGCCACAGATGTATGACGTAGCTCAGTGACAGACTTGCCTACTGCCTCGGA
XLOC_001386	13	TGCTGTTGACAGTGAGCGACAGGGTCTTCAGCACAGCAAATAGTGAAGCCACAGATGTATTTGCTGTGCTGAAGACCCTGGTGCCTACTGCCTCGGA
XLOC_001405	2	TGCTGTTGACAGTGAGCGCGCACGTAAAACCAAAACCAAATAGTGAAGCCACAGATGTATTTGGTTTTGGTTTTACGTGCATGCCTACTGCCTCGGA
XLOC_001405	6	TGCTGTTGACAGTGAGCGAACGCTGTTTACGTTTGAACTATAGTGAAGCCACAGATGTATAGTTCAAACGTAAACAGCGTCTGCCTACTGCCTCGGA
XLOC_001405	7	TGCTGTTGACAGTGAGCGACAGCAGAAAGAAGTTGACAGATAGTGAAGCCACAGATGTATCTGTCAACTTCTTTCTGCTGCTGCCTACTGCCTCGGA
XLOC_001405	14	TGCTGTTGACAGTGAGCGACAGGGCCCCACTTCCTCCTTATAGTGAAGCCACAGATGTATAAGGAGGAAGTGGGGCCCTGCTGCCTACTGCCTCGGA
XLOC_001405	17	TGCTGTTGACAGTGAGCGCTCATGCTGAACGTAAAGGCAATAGTGAAGCCACAGATGTATTGCCTTTACGTTCAGCATGAATGCCTACTGCCTCGGA
XLOC_001481	5	TGCTGTTGACAGTGAGCGACTCTCGAGACTTTCCAGATTATAGTGAAGCCACAGATGTATAATCTGGAAAGTCTCGAGAGGTGCCTACTGCCTCGGA
XLOC_001481	12	TGCTGTTGACAGTGAGCGATGCACAGATGCTATCAGCATATAGTGAAGCCACAGATGTATATGCTGATAGCATCTGTGCACTGCCTACTGCCTCGGA
XLOC_001481	13	TGCTGTTGACAGTGAGCGCCAGATGCTATCAGCATTGATATAGTGAAGCCACAGATGTATATCAATGCTGATAGCATCTGTTGCCTACTGCCTCGGA
XLOC_001481	14	TGCTGTTGACAGTGAGCGACCATGAAAAGAGTTCTTTCCATAGTGAAGCCACAGATGTATGGAAAGAACTCTTTTCATGGGTGCCTACTGCCTCGGA
XLOC_001481	15	TGCTGTTGACAGTGAGCGCAGCACAGAAGTCGAAATTCAATAGTGAAGCCACAGATGTATTGAATTTCGACTTCTGTGCTTTGCCTACTGCCTCGGA
XLOC_001512	4	TGCTGTTGACAGTGAGCGCCGATACTCAATTTTCACCCAATAGTGAAGCCACAGATGTATTGGGTGAAAATTGAGTATCGTTGCCTACTGCCTCGGA
XLOC_001512	5	TGCTGTTGACAGTGAGCGACCATGGTACATTGCTTCGCTATAGTGAAGCCACAGATGTATAGCGAAGCAATGTACCATGGGTGCCTACTGCCTCGGA
XLOC_001512	7	TGCTGTTGACAGTGAGCGCGCCTGACACATTTTTGTCTTATAGTGAAGCCACAGATGTATAAGACAAAAATGTGTCAGGCTTGCCTACTGCCTCGGA
XLOC_001512	8	TGCTGTTGACAGTGAGCGAACCCTTGAAGTTTCTGTGAAATAGTGAAGCCACAGATGTATTTCACAGAAACTTCAAGGGTGTGCCTACTGCCTCGGA
XLOC_001512	9	TGCTGTTGACAGTGAGCGATGAAAACATTCAACATCTTGATAGTGAAGCCACAGATGTATCAAGATGTTGAATGTTTTCACTGCCTACTGCCTCGGA
XLOC_001572	15	TGCTGTTGACAGTGAGCGACTAAGTTCAAATTCTAGCAAATAGTGAAGCCACAGATGTATTTGCTAGAATTTGAACTTAGGTGCCTACTGCCTCGGA
XLOC_001572	18	TGCTGTTGACAGTGAGCGACACCTACAGTGAGCAAGGAGATAGTGAAGCCACAGATGTATCTCCTTGCTCACTGTAGGTGCTGCCTACTGCCTCGGA
XLOC_001720	5	TGCTGTTGACAGTGAGCGCCCCTTTTCAGCTTCCACCTTATAGTGAAGCCACAGATGTATAAGGTGGAAGCTGAAAAGGGATGCCTACTGCCTCGGA
XLOC_001720	10	TGCTGTTGACAGTGAGCGATGACTCTCACGGTTTGTCTAATAGTGAAGCCACAGATGTATTAGACAAACCGTGAGAGTCAGTGCCTACTGCCTCGGA
XLOC_001720	11	TGCTGTTGACAGTGAGCGAAGCAGTCATTCTCTCACTATATAGTGAAGCCACAGATGTATATAGTGAGAGAATGACTGCTCTGCCTACTGCCTCGGA
XLOC_001720	14	TGCTGTTGACAGTGAGCGCAACACACAAGGCTCCATGTTATAGTGAAGCCACAGATGTATAACATGGAGCCTTGTGTGTTATGCCTACTGCCTCGGA
XLOC_001720	17	TGCTGTTGACAGTGAGCGAACACTTGATGTCAACACTAAATAGTGAAGCCACAGATGTATTTAGTGTTGACATCAAGTGTCTGCCTACTGCCTCGGA
XLOC_001794	1	TGCTGTTGACAGTGAGCGCGCATCTGACTCTGCATTTTTATAGTGAAGCCACAGATGTATAAAAATGCAGAGTCAGATGCTTGCCTACTGCCTCGGA
XLOC_001794	4	TGCTGTTGACAGTGAGCGCGAACCTTCTGCTTCCATCTTATAGTGAAGCCACAGATGTATAAGATGGAAGCAGAAGGTTCTTGCCTACTGCCTCGGA
XLOC_001794	8	TGCTGTTGACAGTGAGCGACCAGAACCTTCTGCTTCCATATAGTGAAGCCACAGATGTATATGGAAGCAGAAGGTTCTGGGTGCCTACTGCCTCGGA
XLOC_001794	11	TGCTGTTGACAGTGAGCGAAGTCTCCATTGTCTCTCTGTATAGTGAAGCCACAGATGTATACAGAGAGACAATGGAGACTCTGCCTACTGCCTCGGA
XLOC_001794	13	TGCTGTTGACAGTGAGCGCCCTCTTGCTTCATAAATGAGATAGTGAAGCCACAGATGTATCTCATTTATGAAGCAAGAGGATGCCTACTGCCTCGGA
XLOC_001827	1	TGCTGTTGACAGTGAGCGACTCCATCACTCTTCCTCCTTATAGTGAAGCCACAGATGTATAAGGAGGAAGAGTGATGGAGGTGCCTACTGCCTCGGA
XLOC_001827	2	TGCTGTTGACAGTGAGCGCACCATGCATCTAATTGTAACATAGTGAAGCCACAGATGTATGTTACAATTAGATGCATGGTTTGCCTACTGCCTCGGA
XLOC_001827	3	TGCTGTTGACAGTGAGCGACCATGACAAACACTTGCTTAATAGTGAAGCCACAGATGTATTAAGCAAGTGTTTGTCATGGCTGCCTACTGCCTCGGA
XLOC_001827	5	TGCTGTTGACAGTGAGCGAGGACTGGAAAGTGTTCCCTAATAGTGAAGCCACAGATGTATTAGGGAACACTTTCCAGTCCCTGCCTACTGCCTCGGA
XLOC_001827	6	TGCTGTTGACAGTGAGCGCAGTAATCTTTCTCTACTCTTATAGTGAAGCCACAGATGTATAAGAGTAGAGAAAGATTACTTTGCCTACTGCCTCGGA
XLOC_002154	5	TGCTGTTGACAGTGAGCGAATCTACGATTTCTCTGTTTAATAGTGAAGCCACAGATGTATTAAACAGAGAAATCGTAGATCTGCCTACTGCCTCGGA
XLOC_002154	7	TGCTGTTGACAGTGAGCGCCGCTTCCACTCTTTCAGATTATAGTGAAGCCACAGATGTATAATCTGAAAGAGTGGAAGCGATGCCTACTGCCTCGGA
XLOC_002154	10	TGCTGTTGACAGTGAGCGCGGCGAGCAGATCCTCACCTTATAGTGAAGCCACAGATGTATAAGGTGAGGATCTGCTCGCCTTGCCTACTGCCTCGGA
XLOC_002154	13	TGCTGTTGACAGTGAGCGCCACCCGCATGCAGTTGAGTCATAGTGAAGCCACAGATGTATGACTCAACTGCATGCGGGTGTTGCCTACTGCCTCGGA
XLOC_002154	17	TGCTGTTGACAGTGAGCGCGGCTTACAGACTGACTTGTTATAGTGAAGCCACAGATGTATAACAAGTCAGTCTGTAAGCCATGCCTACTGCCTCGGA
XLOC_002173	2	TGCTGTTGACAGTGAGCGCGGAGACATTTTTGTTGCTGTATAGTGAAGCCACAGATGTATACAGCAACAAAAATGTCTCCATGCCTACTGCCTCGGA
XLOC_002173	5	TGCTGTTGACAGTGAGCGCGCCTCCTCAGTTGTCACCCAATAGTGAAGCCACAGATGTATTGGGTGACAACTGAGGAGGCATGCCTACTGCCTCGGA
XLOC_002173	8	TGCTGTTGACAGTGAGCGCCAAGCCGGAAGAACAAATAAATAGTGAAGCCACAGATGTATTTATTTGTTCTTCCGGCTTGTTGCCTACTGCCTCGGA
XLOC_002173	9	TGCTGTTGACAGTGAGCGCCATTTTTGTTGCTGTTGTTTATAGTGAAGCCACAGATGTATAAACAACAGCAACAAAAATGTTGCCTACTGCCTCGGA
XLOC_002173	15	TGCTGTTGACAGTGAGCGCAAAAAACGAGGAAGAAAGAAATAGTGAAGCCACAGATGTATTTCTTTCTTCCTCGTTTTTTTTGCCTACTGCCTCGGA
XLOC_002250	7	TGCTGTTGACAGTGAGCGCGAGGCACACTCTTGATAGTTATAGTGAAGCCACAGATGTATAACTATCAAGAGTGTGCCTCTTGCCTACTGCCTCGGA
XLOC_002250	8	TGCTGTTGACAGTGAGCGCCAGAGAGGCACACTCTTGATATAGTGAAGCCACAGATGTATATCAAGAGTGTGCCTCTCTGATGCCTACTGCCTCGGA
XLOC_002250	11	TGCTGTTGACAGTGAGCGATGATTGCTCTTTTTCAAGTGATAGTGAAGCCACAGATGTATCACTTGAAAAAGAGCAATCACTGCCTACTGCCTCGGA
XLOC_002250	19	TGCTGTTGACAGTGAGCGCGGTGATCAAGGTGATGACTAATAGTGAAGCCACAGATGTATTAGTCATCACCTTGATCACCATGCCTACTGCCTCGGA
XLOC_002250	20	TGCTGTTGACAGTGAGCGACAGATTACTGATTCAACCACATAGTGAAGCCACAGATGTATGTGGTTGAATCAGTAATCTGCTGCCTACTGCCTCGGA
XLOC_002319	1	TGCTGTTGACAGTGAGCGCCCTTCGGGTTCTTTCGTTTTATAGTGAAGCCACAGATGTATAAAACGAAAGAACCCGAAGGATGCCTACTGCCTCGGA
XLOC_002319	2	TGCTGTTGACAGTGAGCGCCATGCTGAGCATTCTACCAAATAGTGAAGCCACAGATGTATTTGGTAGAATGCTCAGCATGATGCCTACTGCCTCGGA
XLOC_002319	3	TGCTGTTGACAGTGAGCGAATGGGTGAACTTGGAATCTGATAGTGAAGCCACAGATGTATCAGATTCCAAGTTCACCCATGTGCCTACTGCCTCGGA
XLOC_002319	5	TGCTGTTGACAGTGAGCGCCCCTGAGCTTGCTTTGTCTAATAGTGAAGCCACAGATGTATTAGACAAAGCAAGCTCAGGGATGCCTACTGCCTCGGA
XLOC_002319	6	TGCTGTTGACAGTGAGCGAAAGCTGAACGTCCATTCTACATAGTGAAGCCACAGATGTATGTAGAATGGACGTTCAGCTTCTGCCTACTGCCTCGGA
XLOC_002328	1	TGCTGTTGACAGTGAGCGCCACATAGATTCTAGGATATTATAGTGAAGCCACAGATGTATAATATCCTAGAATCTATGTGTTGCCTACTGCCTCGGA
XLOC_002328	2	TGCTGTTGACAGTGAGCGCCACAACGCTTCTTCCAGCTTATAGTGAAGCCACAGATGTATAAGCTGGAAGAAGCGTTGTGATGCCTACTGCCTCGGA
XLOC_002328	7	TGCTGTTGACAGTGAGCGACAGAATTTTTCTCTTCTCATATAGTGAAGCCACAGATGTATATGAGAAGAGAAAAATTCTGCTGCCTACTGCCTCGGA
XLOC_002328	12	TGCTGTTGACAGTGAGCGCCATTTTGAGCACTCCTTCTCATAGTGAAGCCACAGATGTATGAGAAGGAGTGCTCAAAATGATGCCTACTGCCTCGGA
XLOC_002328	20	TGCTGTTGACAGTGAGCGCCACCACACTCCCCACACCATATAGTGAAGCCACAGATGTATATGGTGTGGGGAGTGTGGTGATGCCTACTGCCTCGGA
XLOC_002450	2	TGCTGTTGACAGTGAGCGCGACTCTTGATTTGCTGTTTTATAGTGAAGCCACAGATGTATAAAACAGCAAATCAAGAGTCATGCCTACTGCCTCGGA
XLOC_002450	4	TGCTGTTGACAGTGAGCGAGCACTGGCTGCTTCTGTGTTATAGTGAAGCCACAGATGTATAACACAGAAGCAGCCAGTGCCTGCCTACTGCCTCGGA
XLOC_002450	13	TGCTGTTGACAGTGAGCGCCAGAATTGTATTAAATTGTCATAGTGAAGCCACAGATGTATGACAATTTAATACAATTCTGTTGCCTACTGCCTCGGA
XLOC_002497	1	TGCTGTTGACAGTGAGCGCCCTGGTAAGTCAGTTGTGGAATAGTGAAGCCACAGATGTATTCCACAACTGACTTACCAGGATGCCTACTGCCTCGGA
XLOC_002497	5	TGCTGTTGACAGTGAGCGCGAGAGAGATGACTCAACTGTATAGTGAAGCCACAGATGTATACAGTTGAGTCATCTCTCTCTTGCCTACTGCCTCGGA
XLOC_002497	11	TGCTGTTGACAGTGAGCGCGATGACTCAACTGTTAAAAGATAGTGAAGCCACAGATGTATCTTTTAACAGTTGAGTCATCTTGCCTACTGCCTCGGA
XLOC_002497	13	TGCTGTTGACAGTGAGCGACGCTGAATCTGTCTTTTCTCATAGTGAAGCCACAGATGTATGAGAAAAGACAGATTCAGCGCTGCCTACTGCCTCGGA
XLOC_002497	16	TGCTGTTGACAGTGAGCGCGGCTGCGCTGAATCTGTCTTATAGTGAAGCCACAGATGTATAAGACAGATTCAGCGCAGCCATGCCTACTGCCTCGGA
XLOC_002515	2	TGCTGTTGACAGTGAGCGACAGGGTGGTAGGAATGTATCATAGTGAAGCCACAGATGTATGATACATTCCTACCACCCTGGTGCCTACTGCCTCGGA
XLOC_002515	3	TGCTGTTGACAGTGAGCGATGGTGAGTCTATGATGTCTGATAGTGAAGCCACAGATGTATCAGACATCATAGACTCACCACTGCCTACTGCCTCGGA
XLOC_002515	5	TGCTGTTGACAGTGAGCGCGAAAATCATAAAGTTGAAAAATAGTGAAGCCACAGATGTATTTTTCAACTTTATGATTTTCATGCCTACTGCCTCGGA
XLOC_002515	8	TGCTGTTGACAGTGAGCGAGAGCTCTGCTCTGTTGAAAAATAGTGAAGCCACAGATGTATTTTTCAACAGAGCAGAGCTCCTGCCTACTGCCTCGGA
XLOC_002515	9	TGCTGTTGACAGTGAGCGCCACCGCCCACATGCTAACTCATAGTGAAGCCACAGATGTATGAGTTAGCATGTGGGCGGTGATGCCTACTGCCTCGGA
XLOC_002625	1	TGCTGTTGACAGTGAGCGCACTGACAACACAGCAATGATATAGTGAAGCCACAGATGTATATCATTGCTGTGTTGTCAGTTTGCCTACTGCCTCGGA
XLOC_002625	10	TGCTGTTGACAGTGAGCGAGAATTGTAGTGAATCACCCTATAGTGAAGCCACAGATGTATAGGGTGATTCACTACAATTCCTGCCTACTGCCTCGGA
XLOC_002625	16	TGCTGTTGACAGTGAGCGCATCAACTGACAACACAGCAAATAGTGAAGCCACAGATGTATTTGCTGTGTTGTCAGTTGATTTGCCTACTGCCTCGGA
XLOC_002625	19	TGCTGTTGACAGTGAGCGCCCCTTCTATCCAATCAACTGATAGTGAAGCCACAGATGTATCAGTTGATTGGATAGAAGGGTTGCCTACTGCCTCGGA
XLOC_002634	4	TGCTGTTGACAGTGAGCGCTGACTACACAAACTTACTTAATAGTGAAGCCACAGATGTATTAAGTAAGTTTGTGTAGTCATTGCCTACTGCCTCGGA
XLOC_002634	5	TGCTGTTGACAGTGAGCGCGAGGCTGATGCTCTTACTGAATAGTGAAGCCACAGATGTATTCAGTAAGAGCATCAGCCTCATGCCTACTGCCTCGGA
XLOC_002634	6	TGCTGTTGACAGTGAGCGCCTCAGACATCATCTCATGCTATAGTGAAGCCACAGATGTATAGCATGAGATGATGTCTGAGTTGCCTACTGCCTCGGA
XLOC_002634	7	TGCTGTTGACAGTGAGCGCCATCATCTCATGCTAAGCTGATAGTGAAGCCACAGATGTATCAGCTTAGCATGAGATGATGTTGCCTACTGCCTCGGA
XLOC_002634	10	TGCTGTTGACAGTGAGCGAAAGGACTACACAGCAAGCTGATAGTGAAGCCACAGATGTATCAGCTTGCTGTGTAGTCCTTGTGCCTACTGCCTCGGA
XLOC_002788	6	TGCTGTTGACAGTGAGCGCACATGAAAAGGTTTCTCCTGATAGTGAAGCCACAGATGTATCAGGAGAAACCTTTTCATGTTTGCCTACTGCCTCGGA
XLOC_002788	13	TGCTGTTGACAGTGAGCGCTCTGTCTCCGTCACTGTCTAATAGTGAAGCCACAGATGTATTAGACAGTGACGGAGACAGATTGCCTACTGCCTCGGA
XLOC_002788	14	TGCTGTTGACAGTGAGCGAAACATCAAAAGAGCTATTTCATAGTGAAGCCACAGATGTATGAAATAGCTCTTTTGATGTTGTGCCTACTGCCTCGGA
XLOC_002804	1	TGCTGTTGACAGTGAGCGACCGTAAATCTCTTTTGTCTAATAGTGAAGCCACAGATGTATTAGACAAAAGAGATTTACGGGTGCCTACTGCCTCGGA
XLOC_002804	5	TGCTGTTGACAGTGAGCGCTCCTCTTTTTCTTCTTGTTTATAGTGAAGCCACAGATGTATAAACAAGAAGAAAAAGAGGATTGCCTACTGCCTCGGA
XLOC_002804	6	TGCTGTTGACAGTGAGCGCCAAGGCCAAAATTCAACCTCATAGTGAAGCCACAGATGTATGAGGTTGAATTTTGGCCTTGATGCCTACTGCCTCGGA
XLOC_002804	8	TGCTGTTGACAGTGAGCGACACAACTCATGTACATACATATAGTGAAGCCACAGATGTATATGTATGTACATGAGTTGTGCTGCCTACTGCCTCGGA
XLOC_002804	10	TGCTGTTGACAGTGAGCGAAAAAGTCATGGTGTCATGAGATAGTGAAGCCACAGATGTATCTCATGACACCATGACTTTTCTGCCTACTGCCTCGGA
XLOC_002879	1	TGCTGTTGACAGTGAGCGACCCCTTCTATTACATCTTTAATAGTGAAGCCACAGATGTATTAAAGATGTAATAGAAGGGGCTGCCTACTGCCTCGGA
XLOC_002879	3	TGCTGTTGACAGTGAGCGCAGCCCCTTCTATTACATCTTATAGTGAAGCCACAGATGTATAAGATGTAATAGAAGGGGCTTTGCCTACTGCCTCGGA
XLOC_002879	5	TGCTGTTGACAGTGAGCGACAAAACTTTATTGCTTACATATAGTGAAGCCACAGATGTATATGTAAGCAATAAAGTTTTGCTGCCTACTGCCTCGGA
XLOC_002879	8	TGCTGTTGACAGTGAGCGCAAAGCCCCTTCTATTACATCATAGTGAAGCCACAGATGTATGATGTAATAGAAGGGGCTTTTTGCCTACTGCCTCGGA
XLOC_002879	13	TGCTGTTGACAGTGAGCGACCTTCTATTACATCTTTAGGATAGTGAAGCCACAGATGTATCCTAAAGATGTAATAGAAGGGTGCCTACTGCCTCGGA
XLOC_003503	1	TGCTGTTGACAGTGAGCGCCCTCTATATTCTAGCACTTTATAGTGAAGCCACAGATGTATAAAGTGCTAGAATATAGAGGATGCCTACTGCCTCGGA
XLOC_003503	2	TGCTGTTGACAGTGAGCGAAGACCCTATCTTGTTCACGTATAGTGAAGCCACAGATGTATACGTGAACAAGATAGGGTCTGTGCCTACTGCCTCGGA
XLOC_003503	4	TGCTGTTGACAGTGAGCGCCATTAACCTTGTTTTGTCTGATAGTGAAGCCACAGATGTATCAGACAAAACAAGGTTAATGATGCCTACTGCCTCGGA
XLOC_003503	5	TGCTGTTGACAGTGAGCGCCCAAACAGACTTACAAAGATATAGTGAAGCCACAGATGTATATCTTTGTAAGTCTGTTTGGATGCCTACTGCCTCGGA
XLOC_003503	6	TGCTGTTGACAGTGAGCGCGACTCCTCATTAGCTAATTTATAGTGAAGCCACAGATGTATAAATTAGCTAATGAGGAGTCTTGCCTACTGCCTCGGA
XLOC_003554	4	TGCTGTTGACAGTGAGCGCCACACAGTACTGTACAGTACATAGTGAAGCCACAGATGTATGTACTGTACAGTACTGTGTGTTGCCTACTGCCTCGGA
XLOC_003554	5	TGCTGTTGACAGTGAGCGCCACAACAGAGCTGAAATTTCATAGTGAAGCCACAGATGTATGAAATTTCAGCTCTGTTGTGTTGCCTACTGCCTCGGA
XLOC_003554	8	TGCTGTTGACAGTGAGCGAAGAGCTGAAATTTCCTATTGATAGTGAAGCCACAGATGTATCAATAGGAAATTTCAGCTCTGTGCCTACTGCCTCGGA
XLOC_003554	10	TGCTGTTGACAGTGAGCGACCGGGACATCATCTCAGCATATAGTGAAGCCACAGATGTATATGCTGAGATGATGTCCCGGCTGCCTACTGCCTCGGA
XLOC_003554	13	TGCTGTTGACAGTGAGCGAACACAACAGAGCTGAAATTTATAGTGAAGCCACAGATGTATAAATTTCAGCTCTGTTGTGTGTGCCTACTGCCTCGGA
XLOC_003659	2	TGCTGTTGACAGTGAGCGATAGGTACAAGCTGTTGTCATATAGTGAAGCCACAGATGTATATGACAACAGCTTGTACCTAGTGCCTACTGCCTCGGA
XLOC_003659	5	TGCTGTTGACAGTGAGCGCCACTCACACACACCAATAAAATAGTGAAGCCACAGATGTATTTTATTGGTGTGTGTGAGTGTTGCCTACTGCCTCGGA
XLOC_003659	6	TGCTGTTGACAGTGAGCGCCTCTGGAGAACACAAAAACTATAGTGAAGCCACAGATGTATAGTTTTTGTGTTCTCCAGAGATGCCTACTGCCTCGGA
XLOC_003659	12	TGCTGTTGACAGTGAGCGAAAAAACTTCTTTTTCGTGTGATAGTGAAGCCACAGATGTATCACACGAAAAAGAAGTTTTTGTGCCTACTGCCTCGGA
XLOC_003659	16	TGCTGTTGACAGTGAGCGACTATCCAGCTCTTCCAGCTTATAGTGAAGCCACAGATGTATAAGCTGGAAGAGCTGGATAGCTGCCTACTGCCTCGGA
XLOC_003677	1	TGCTGTTGACAGTGAGCGCGCAAACAATTCTTACCATTTATAGTGAAGCCACAGATGTATAAATGGTAAGAATTGTTTGCATGCCTACTGCCTCGGA
XLOC_003677	4	TGCTGTTGACAGTGAGCGCTCACAGACTGTTTCTAACTGATAGTGAAGCCACAGATGTATCAGTTAGAAACAGTCTGTGAATGCCTACTGCCTCGGA
XLOC_003677	9	TGCTGTTGACAGTGAGCGATCATTTCTTATTTCAATCTGATAGTGAAGCCACAGATGTATCAGATTGAAATAAGAAATGAGTGCCTACTGCCTCGGA
XLOC_003677	14	TGCTGTTGACAGTGAGCGAAAGCCCTATAGTGCTGTCTTATAGTGAAGCCACAGATGTATAAGACAGCACTATAGGGCTTCTGCCTACTGCCTCGGA
XLOC_003677	19	TGCTGTTGACAGTGAGCGAAGCTCCTATCCTGAGTTCTTATAGTGAAGCCACAGATGTATAAGAACTCAGGATAGGAGCTCTGCCTACTGCCTCGGA
XLOC_003783	2	TGCTGTTGACAGTGAGCGCTGTGCACATACACTCACAGAATAGTGAAGCCACAGATGTATTCTGTGAGTGTATGTGCACATTGCCTACTGCCTCGGA
XLOC_003783	4	TGCTGTTGACAGTGAGCGACTACATAATCCAGCTATTTTATAGTGAAGCCACAGATGTATAAAATAGCTGGATTATGTAGGTGCCTACTGCCTCGGA
XLOC_003783	6	TGCTGTTGACAGTGAGCGAACAGACACATAAGCATAAATATAGTGAAGCCACAGATGTATATTTATGCTTATGTGTCTGTGTGCCTACTGCCTCGGA
XLOC_003783	7	TGCTGTTGACAGTGAGCGAAAGAACTTCGATCTAGTTGAATAGTGAAGCCACAGATGTATTCAACTAGATCGAAGTTCTTCTGCCTACTGCCTCGGA
XLOC_003783	9	TGCTGTTGACAGTGAGCGCAGCAATTACGGTGCATATTTATAGTGAAGCCACAGATGTATAAATATGCACCGTAATTGCTTTGCCTACTGCCTCGGA
XLOC_003926	3	TGCTGTTGACAGTGAGCGAACCAAGTAAGGTTCCTCCTGATAGTGAAGCCACAGATGTATCAGGAGGAACCTTACTTGGTCTGCCTACTGCCTCGGA
XLOC_003926	7	TGCTGTTGACAGTGAGCGAACGAGTAAACTAACAACCTAATAGTGAAGCCACAGATGTATTAGGTTGTTAGTTTACTCGTGTGCCTACTGCCTCGGA
XLOC_003926	10	TGCTGTTGACAGTGAGCGCGAGACCAGATGTCTTGAAAAATAGTGAAGCCACAGATGTATTTTTCAAGACATCTGGTCTCTTGCCTACTGCCTCGGA
XLOC_003926	18	TGCTGTTGACAGTGAGCGCCACGAGTAAACTAACAACCTATAGTGAAGCCACAGATGTATAGGTTGTTAGTTTACTCGTGTTGCCTACTGCCTCGGA
XLOC_003971	5	TGCTGTTGACAGTGAGCGCACTTACTCTCTTTCAATCTGATAGTGAAGCCACAGATGTATCAGATTGAAAGAGAGTAAGTATGCCTACTGCCTCGGA
XLOC_003971	6	TGCTGTTGACAGTGAGCGATCTGTGTATGTCTGTGTCTAATAGTGAAGCCACAGATGTATTAGACACAGACATACACAGACTGCCTACTGCCTCGGA
XLOC_003971	7	TGCTGTTGACAGTGAGCGATGTGTATGTCTTTCTGTCTGATAGTGAAGCCACAGATGTATCAGACAGAAAGACATACACACTGCCTACTGCCTCGGA
XLOC_003971	9	TGCTGTTGACAGTGAGCGCGCATGTATATGCACTGTATGATAGTGAAGCCACAGATGTATCATACAGTGCATATACATGCATGCCTACTGCCTCGGA
XLOC_003971	11	TGCTGTTGACAGTGAGCGCCAGTAGGAGGACATAACCATATAGTGAAGCCACAGATGTATATGGTTATGTCCTCCTACTGTTGCCTACTGCCTCGGA
XLOC_004068	1	TGCTGTTGACAGTGAGCGCCAGATCCAGAGCCAAATTATATAGTGAAGCCACAGATGTATATAATTTGGCTCTGGATCTGTTGCCTACTGCCTCGGA
XLOC_004068	7	TGCTGTTGACAGTGAGCGCGAAAGGCATGTTTAAGTTAAATAGTGAAGCCACAGATGTATTTAACTTAAACATGCCTTTCTTGCCTACTGCCTCGGA
XLOC_004068	9	TGCTGTTGACAGTGAGCGATCAAAGCATCCTTCATGTTTATAGTGAAGCCACAGATGTATAAACATGAAGGATGCTTTGAGTGCCTACTGCCTCGGA
XLOC_004068	12	TGCTGTTGACAGTGAGCGAAGAAAAGAAAGGCATGTTTAATAGTGAAGCCACAGATGTATTAAACATGCCTTTCTTTTCTGTGCCTACTGCCTCGGA
XLOC_004068	13	TGCTGTTGACAGTGAGCGCGACTATGACAGGAAATATTTATAGTGAAGCCACAGATGTATAAATATTTCCTGTCATAGTCATGCCTACTGCCTCGGA
XLOC_004263	2	TGCTGTTGACAGTGAGCGCCAGAACATTTCTTACTTCAGATAGTGAAGCCACAGATGTATCTGAAGTAAGAAATGTTCTGATGCCTACTGCCTCGGA
XLOC_004263	3	TGCTGTTGACAGTGAGCGCCCAGGCTTCCAAACAGTTTTATAGTGAAGCCACAGATGTATAAAACTGTTTGGAAGCCTGGATGCCTACTGCCTCGGA
XLOC_004263	4	TGCTGTTGACAGTGAGCGCTCACAAGGAATCTCCATTTTATAGTGAAGCCACAGATGTATAAAATGGAGATTCCTTGTGAATGCCTACTGCCTCGGA
XLOC_004263	9	TGCTGTTGACAGTGAGCGAGATTCACAAGGAATCTCCATATAGTGAAGCCACAGATGTATATGGAGATTCCTTGTGAATCCTGCCTACTGCCTCGGA
XLOC_004263	10	TGCTGTTGACAGTGAGCGCGGCTTCCAAACAGTTTTCATATAGTGAAGCCACAGATGTATATGAAAACTGTTTGGAAGCCTTGCCTACTGCCTCGGA
XLOC_004306	3	TGCTGTTGACAGTGAGCGAAGAGTGCACAGTCTCACCTTATAGTGAAGCCACAGATGTATAAGGTGAGACTGTGCACTCTCTGCCTACTGCCTCGGA
XLOC_004306	7	TGCTGTTGACAGTGAGCGCCAGACGTGAATTCTGTTTAAATAGTGAAGCCACAGATGTATTTAAACAGAATTCACGTCTGTTGCCTACTGCCTCGGA
XLOC_004306	10	TGCTGTTGACAGTGAGCGCGCACAGTCTCACCTTACTTAATAGTGAAGCCACAGATGTATTAAGTAAGGTGAGACTGTGCATGCCTACTGCCTCGGA
XLOC_004306	12	TGCTGTTGACAGTGAGCGCGGCTCTCGTGAAGATTTGAAATAGTGAAGCCACAGATGTATTTCAAATCTTCACGAGAGCCATGCCTACTGCCTCGGA
XLOC_004306	13	TGCTGTTGACAGTGAGCGACCAGCGGAAGTGGATGAGAAATAGTGAAGCCACAGATGTATTTCTCATCCACTTCCGCTGGCTGCCTACTGCCTCGGA
XLOC_004345	1	TGCTGTTGACAGTGAGCGACAGAAGTTTTCTTTCAGCTTATAGTGAAGCCACAGATGTATAAGCTGAAAGAAAACTTCTGCTGCCTACTGCCTCGGA
XLOC_004345	6	TGCTGTTGACAGTGAGCGCCATGGCGACTGCAGAAGTTTATAGTGAAGCCACAGATGTATAAACTTCTGCAGTCGCCATGTTGCCTACTGCCTCGGA
XLOC_004345	7	TGCTGTTGACAGTGAGCGCTAGGGTGAAGGATTTAATTAATAGTGAAGCCACAGATGTATTAATTAAATCCTTCACCCTAATGCCTACTGCCTCGGA
XLOC_004345	8	TGCTGTTGACAGTGAGCGCCTATTTGTGTCAGCTATGTGATAGTGAAGCCACAGATGTATCACATAGCTGACACAAATAGATGCCTACTGCCTCGGA
XLOC_004345	9	TGCTGTTGACAGTGAGCGACGCTGCTGTTATTCAGTGTGATAGTGAAGCCACAGATGTATCACACTGAATAACAGCAGCGGTGCCTACTGCCTCGGA
XLOC_004709	2	TGCTGTTGACAGTGAGCGCCAAAACAACTCTTGCAACTAATAGTGAAGCCACAGATGTATTAGTTGCAAGAGTTGTTTTGTTGCCTACTGCCTCGGA
XLOC_004709	4	TGCTGTTGACAGTGAGCGACCAGCAGATACAGCTACAAAATAGTGAAGCCACAGATGTATTTTGTAGCTGTATCTGCTGGGTGCCTACTGCCTCGGA
XLOC_004709	5	TGCTGTTGACAGTGAGCGCGCAGATACAGCTACAAAACAATAGTGAAGCCACAGATGTATTGTTTTGTAGCTGTATCTGCTTGCCTACTGCCTCGGA
XLOC_004709	11	TGCTGTTGACAGTGAGCGCGACATCGATCATTACAGAAAATAGTGAAGCCACAGATGTATTTTCTGTAATGATCGATGTCATGCCTACTGCCTCGGA
XLOC_004709	13	TGCTGTTGACAGTGAGCGCTCCCACCTTTTCTTCTATTGATAGTGAAGCCACAGATGTATCAATAGAAGAAAAGGTGGGAATGCCTACTGCCTCGGA
XLOC_004774	2	TGCTGTTGACAGTGAGCGACCAGACATACATACAAGCAAATAGTGAAGCCACAGATGTATTTGCTTGTATGTATGTCTGGGTGCCTACTGCCTCGGA
XLOC_004774	9	TGCTGTTGACAGTGAGCGCTGATGGCTCACACAATTCTAATAGTGAAGCCACAGATGTATTAGAATTGTGTGAGCCATCATTGCCTACTGCCTCGGA
XLOC_004774	10	TGCTGTTGACAGTGAGCGCGGCTCACACAATTCTATCATATAGTGAAGCCACAGATGTATATGATAGAATTGTGTGAGCCATGCCTACTGCCTCGGA
XLOC_004774	11	TGCTGTTGACAGTGAGCGCCCTATGAATTGCTGGTCCTGATAGTGAAGCCACAGATGTATCAGGACCAGCAATTCATAGGATGCCTACTGCCTCGGA
XLOC_004774	12	TGCTGTTGACAGTGAGCGAACATTGACTTTTCTCACCAGATAGTGAAGCCACAGATGTATCTGGTGAGAAAAGTCAATGTGTGCCTACTGCCTCGGA
XLOC_005282	3	TGCTGTTGACAGTGAGCGCCAGGAAGAAAAAGAAATTCAATAGTGAAGCCACAGATGTATTGAATTTCTTTTTCTTCCTGATGCCTACTGCCTCGGA
XLOC_005282	4	TGCTGTTGACAGTGAGCGCGACAAGCATCTAGTCACGGAATAGTGAAGCCACAGATGTATTCCGTGACTAGATGCTTGTCATGCCTACTGCCTCGGA
XLOC_005282	7	TGCTGTTGACAGTGAGCGCTACAACAACAGTGATTCTACATAGTGAAGCCACAGATGTATGTAGAATCACTGTTGTTGTATTGCCTACTGCCTCGGA
XLOC_005282	9	TGCTGTTGACAGTGAGCGCCAACAGTGATTCTACTGCAAATAGTGAAGCCACAGATGTATTTGCAGTAGAATCACTGTTGTTGCCTACTGCCTCGGA
XLOC_005282	15	TGCTGTTGACAGTGAGCGCCACGGATAACCTCTAACCAAATAGTGAAGCCACAGATGTATTTGGTTAGAGGTTATCCGTGATGCCTACTGCCTCGGA
XLOC_005468	1	TGCTGTTGACAGTGAGCGATCACTGTATTCTGATCTGTAATAGTGAAGCCACAGATGTATTACAGATCAGAATACAGTGAGTGCCTACTGCCTCGGA
XLOC_005468	5	TGCTGTTGACAGTGAGCGCTGAAGTAACTCTCCTTTCTAATAGTGAAGCCACAGATGTATTAGAAAGGAGAGTTACTTCATTGCCTACTGCCTCGGA
XLOC_005468	8	TGCTGTTGACAGTGAGCGCCCACCTCCAGATTTCTTGTTATAGTGAAGCCACAGATGTATAACAAGAAATCTGGAGGTGGTTGCCTACTGCCTCGGA
XLOC_005468	9	TGCTGTTGACAGTGAGCGCACTCTCCTTTCTAGAACATTATAGTGAAGCCACAGATGTATAATGTTCTAGAAAGGAGAGTTTGCCTACTGCCTCGGA
XLOC_005468	10	TGCTGTTGACAGTGAGCGCGCCTGGAGATGTTACAAGTAATAGTGAAGCCACAGATGTATTACTTGTAACATCTCCAGGCATGCCTACTGCCTCGGA
XLOC_005958	1	TGCTGTTGACAGTGAGCGCCCTACGTGTTCAGCTGCTTGATAGTGAAGCCACAGATGTATCAAGCAGCTGAACACGTAGGATGCCTACTGCCTCGGA
XLOC_005958	3	TGCTGTTGACAGTGAGCGCACTGTTCATAGACTTACCCTATAGTGAAGCCACAGATGTATAGGGTAAGTCTATGAACAGTATGCCTACTGCCTCGGA
XLOC_005958	6	TGCTGTTGACAGTGAGCGCCAGCAAGTGCCCAGTATCTTATAGTGAAGCCACAGATGTATAAGATACTGGGCACTTGCTGTTGCCTACTGCCTCGGA
XLOC_005958	14	TGCTGTTGACAGTGAGCGCGCCGCTCAACTCCCTATCATATAGTGAAGCCACAGATGTATATGATAGGGAGTTGAGCGGCATGCCTACTGCCTCGGA
XLOC_005958	15	TGCTGTTGACAGTGAGCGCCCCTATCATACTGTTCATAGATAGTGAAGCCACAGATGTATCTATGAACAGTATGATAGGGATGCCTACTGCCTCGGA
XLOC_005978	8	TGCTGTTGACAGTGAGCGCAGCAAGAGAGCAAGAATGAGATAGTGAAGCCACAGATGTATCTCATTCTTGCTCTCTTGCTTTGCCTACTGCCTCGGA
XLOC_005978	9	TGCTGTTGACAGTGAGCGACCCCCATGAATACAAAGCAAATAGTGAAGCCACAGATGTATTTGCTTTGTATTCATGGGGGGTGCCTACTGCCTCGGA
XLOC_005978	10	TGCTGTTGACAGTGAGCGCTCAATCCTTGTCTCCAGGTTATAGTGAAGCCACAGATGTATAACCTGGAGACAAGGATTGATTGCCTACTGCCTCGGA
XLOC_005978	15	TGCTGTTGACAGTGAGCGACCTATCAGTCTGGATCTTAAATAGTGAAGCCACAGATGTATTTAAGATCCAGACTGATAGGGTGCCTACTGCCTCGGA
XLOC_005978	18	TGCTGTTGACAGTGAGCGCGCAACAGGAGCCACAACTTGATAGTGAAGCCACAGATGTATCAAGTTGTGGCTCCTGTTGCATGCCTACTGCCTCGGA
XLOC_006011	1	TGCTGTTGACAGTGAGCGCGGTGTCTATTTAACAGTTTGATAGTGAAGCCACAGATGTATCAAACTGTTAAATAGACACCTTGCCTACTGCCTCGGA
XLOC_006011	3	TGCTGTTGACAGTGAGCGCACAGATGTTGTGAGTGGTTTATAGTGAAGCCACAGATGTATAAACCACTCACAACATCTGTATGCCTACTGCCTCGGA
XLOC_006111	1	TGCTGTTGACAGTGAGCGCCCTGCAACTTCTTCTGACTTATAGTGAAGCCACAGATGTATAAGTCAGAAGAAGTTGCAGGATGCCTACTGCCTCGGA
XLOC_006111	10	TGCTGTTGACAGTGAGCGCGCAACTTCTTCTGACTTCTAATAGTGAAGCCACAGATGTATTAGAAGTCAGAAGAAGTTGCATGCCTACTGCCTCGGA
XLOC_006111	15	TGCTGTTGACAGTGAGCGAAGAGCTGATTCCTGCAACTTATAGTGAAGCCACAGATGTATAAGTTGCAGGAATCAGCTCTCTGCCTACTGCCTCGGA
XLOC_006162	1	TGCTGTTGACAGTGAGCGAACGCCCTCTTCTTGTGTGTAATAGTGAAGCCACAGATGTATTACACACAAGAAGAGGGCGTCTGCCTACTGCCTCGGA
XLOC_006162	2	TGCTGTTGACAGTGAGCGCCCTGCTGTCTGAGCTGTCTGATAGTGAAGCCACAGATGTATCAGACAGCTCAGACAGCAGGATGCCTACTGCCTCGGA
XLOC_006162	3	TGCTGTTGACAGTGAGCGCGGAGAGAGAAGTCTCACCTGATAGTGAAGCCACAGATGTATCAGGTGAGACTTCTCTCTCCTTGCCTACTGCCTCGGA
XLOC_006162	4	TGCTGTTGACAGTGAGCGCTGACATGGCAATGCTCTTTTATAGTGAAGCCACAGATGTATAAAAGAGCATTGCCATGTCATTGCCTACTGCCTCGGA
XLOC_006162	7	TGCTGTTGACAGTGAGCGCCACTTTGAAAAAGATGACATATAGTGAAGCCACAGATGTATATGTCATCTTTTTCAAAGTGTTGCCTACTGCCTCGGA
XLOC_006419	2	TGCTGTTGACAGTGAGCGCGACAAGAACCTTTGGAGTTTATAGTGAAGCCACAGATGTATAAACTCCAAAGGTTCTTGTCTTGCCTACTGCCTCGGA
XLOC_006419	4	TGCTGTTGACAGTGAGCGATCTGTTCTTACAGCTTAAAAATAGTGAAGCCACAGATGTATTTTTAAGCTGTAAGAACAGAGTGCCTACTGCCTCGGA
XLOC_006419	5	TGCTGTTGACAGTGAGCGATTGCTCTGTTCTTACAGCTTATAGTGAAGCCACAGATGTATAAGCTGTAAGAACAGAGCAAGTGCCTACTGCCTCGGA
XLOC_006419	17	TGCTGTTGACAGTGAGCGAAGGAGCCAGTATTCTACTCTATAGTGAAGCCACAGATGTATAGAGTAGAATACTGGCTCCTCTGCCTACTGCCTCGGA
XLOC_006419	18	TGCTGTTGACAGTGAGCGAAGTTTAACTTTTGCTTCCCAATAGTGAAGCCACAGATGTATTGGGAAGCAAAAGTTAAACTCTGCCTACTGCCTCGGA
XLOC_006448	3	TGCTGTTGACAGTGAGCGACCTCCCACTTCAATCATCAAATAGTGAAGCCACAGATGTATTTGATGATTGAAGTGGGAGGGTGCCTACTGCCTCGGA
XLOC_006448	4	TGCTGTTGACAGTGAGCGCCAGTAGTACAAGGTCAGCTAATAGTGAAGCCACAGATGTATTAGCTGACCTTGTACTACTGTTGCCTACTGCCTCGGA
XLOC_006448	5	TGCTGTTGACAGTGAGCGAAGAGATGGAGCACCTTCGTTATAGTGAAGCCACAGATGTATAACGAAGGTGCTCCATCTCTCTGCCTACTGCCTCGGA
XLOC_006448	6	TGCTGTTGACAGTGAGCGCTAGGATTTCTGTTTCACAATATAGTGAAGCCACAGATGTATATTGTGAAACAGAAATCCTAATGCCTACTGCCTCGGA
XLOC_006448	8	TGCTGTTGACAGTGAGCGACCACTTCAATCATCAATCAAATAGTGAAGCCACAGATGTATTTGATTGATGATTGAAGTGGGTGCCTACTGCCTCGGA
XLOC_006607	1	TGCTGTTGACAGTGAGCGCGGGACTGATAGAGGAACAAAATAGTGAAGCCACAGATGTATTTTGTTCCTCTATCAGTCCCTTGCCTACTGCCTCGGA
XLOC_006607	4	TGCTGTTGACAGTGAGCGACTCTGGCATCAGATAATCAGATAGTGAAGCCACAGATGTATCTGATTATCTGATGCCAGAGGTGCCTACTGCCTCGGA
XLOC_006607	14	TGCTGTTGACAGTGAGCGCCCCAGCCTTACATAATTTATATAGTGAAGCCACAGATGTATATAAATTATGTAAGGCTGGGATGCCTACTGCCTCGGA
XLOC_006607	18	TGCTGTTGACAGTGAGCGAGACTACTGCTTGTATGTCTCATAGTGAAGCCACAGATGTATGAGACATACAAGCAGTAGTCCTGCCTACTGCCTCGGA
XLOC_006684	1	TGCTGTTGACAGTGAGCGACCTCACACATTAGCTAAGCAATAGTGAAGCCACAGATGTATTGCTTAGCTAATGTGTGAGGCTGCCTACTGCCTCGGA
XLOC_006684	2	TGCTGTTGACAGTGAGCGAGAGGAACAAGATTCTTCATTATAGTGAAGCCACAGATGTATAATGAAGAATCTTGTTCCTCCTGCCTACTGCCTCGGA
XLOC_006684	5	TGCTGTTGACAGTGAGCGACCCCAAGGAGAAGCTGTTTAATAGTGAAGCCACAGATGTATTAAACAGCTTCTCCTTGGGGCTGCCTACTGCCTCGGA
XLOC_006684	6	TGCTGTTGACAGTGAGCGACACCTGAGTATTGGAATTAAATAGTGAAGCCACAGATGTATTTAATTCCAATACTCAGGTGGTGCCTACTGCCTCGGA
XLOC_006684	11	TGCTGTTGACAGTGAGCGACAGAAAAGAGGAAATATGATATAGTGAAGCCACAGATGTATATCATATTTCCTCTTTTCTGGTGCCTACTGCCTCGGA
XLOC_006924	3	TGCTGTTGACAGTGAGCGCCCACACTCATTTTTTACCTCATAGTGAAGCCACAGATGTATGAGGTAAAAAATGAGTGTGGTTGCCTACTGCCTCGGA
XLOC_006924	8	TGCTGTTGACAGTGAGCGATGAGTCGATTCTGATGAGGTATAGTGAAGCCACAGATGTATACCTCATCAGAATCGACTCACTGCCTACTGCCTCGGA
XLOC_006924	10	TGCTGTTGACAGTGAGCGAGAAATCAAAGCACTAAATGAATAGTGAAGCCACAGATGTATTCATTTAGTGCTTTGATTTCGTGCCTACTGCCTCGGA
XLOC_006924	17	TGCTGTTGACAGTGAGCGATGACTGCATCAAGGTATTTAATAGTGAAGCCACAGATGTATTAAATACCTTGATGCAGTCACTGCCTACTGCCTCGGA
XLOC_006924	19	TGCTGTTGACAGTGAGCGAAGAGATCGAAGAGAAGTATAATAGTGAAGCCACAGATGTATTATACTTCTCTTCGATCTCTCTGCCTACTGCCTCGGA
XLOC_006930	5	TGCTGTTGACAGTGAGCGCCCCACAGGTACTGCTAATTGATAGTGAAGCCACAGATGTATCAATTAGCAGTACCTGTGGGATGCCTACTGCCTCGGA
XLOC_006930	6	TGCTGTTGACAGTGAGCGCCATAGTCAGTCAGCTATTGGATAGTGAAGCCACAGATGTATCCAATAGCTGACTGACTATGATGCCTACTGCCTCGGA
XLOC_006930	7	TGCTGTTGACAGTGAGCGCACGGGTGAAAATGCTTCGTGATAGTGAAGCCACAGATGTATCACGAAGCATTTTCACCCGTATGCCTACTGCCTCGGA
XLOC_006930	13	TGCTGTTGACAGTGAGCGACTCTAGAAACAAGCAAAAACATAGTGAAGCCACAGATGTATGTTTTTGCTTGTTTCTAGAGCTGCCTACTGCCTCGGA
XLOC_006930	17	TGCTGTTGACAGTGAGCGAAGAGCTCATGTCTCTAGCTCATAGTGAAGCCACAGATGTATGAGCTAGAGACATGAGCTCTGTGCCTACTGCCTCGGA
XLOC_007022	1	TGCTGTTGACAGTGAGCGCTCTGTATCTTCTGCTGGTTTATAGTGAAGCCACAGATGTATAAACCAGCAGAAGATACAGATTGCCTACTGCCTCGGA
XLOC_007022	5	TGCTGTTGACAGTGAGCGCCAGTCAGATCTGCTCACCTGATAGTGAAGCCACAGATGTATCAGGTGAGCAGATCTGACTGATGCCTACTGCCTCGGA
XLOC_007022	9	TGCTGTTGACAGTGAGCGCAAGCGGTTTGCTTCCAATTTATAGTGAAGCCACAGATGTATAAATTGGAAGCAAACCGCTTATGCCTACTGCCTCGGA
XLOC_007272	1	TGCTGTTGACAGTGAGCGCGCACAAATAGCTTTGAATTTATAGTGAAGCCACAGATGTATAAATTCAAAGCTATTTGTGCTTGCCTACTGCCTCGGA
XLOC_007272	10	TGCTGTTGACAGTGAGCGCGACGAATACACCTTCTTCTTATAGTGAAGCCACAGATGTATAAGAAGAAGGTGTATTCGTCATGCCTACTGCCTCGGA
XLOC_007272	12	TGCTGTTGACAGTGAGCGCATGGACTGAGCAGCTAACTAATAGTGAAGCCACAGATGTATTAGTTAGCTGCTCAGTCCATTTGCCTACTGCCTCGGA
XLOC_007272	16	TGCTGTTGACAGTGAGCGAACTGAGCAGCTAACTATTAAATAGTGAAGCCACAGATGTATTTAATAGTTAGCTGCTCAGTCTGCCTACTGCCTCGGA
XLOC_007272	17	TGCTGTTGACAGTGAGCGCCTCGAGCACATCCATCCCTTATAGTGAAGCCACAGATGTATAAGGGATGGATGTGCTCGAGATGCCTACTGCCTCGGA
XLOC_007358	1	TGCTGTTGACAGTGAGCGCCTCGCTCTCTCTTGCTTCTTATAGTGAAGCCACAGATGTATAAGAAGCAAGAGAGAGCGAGATGCCTACTGCCTCGGA
XLOC_007358	4	TGCTGTTGACAGTGAGCGCAGACCAATTGCCACTTCTTTATAGTGAAGCCACAGATGTATAAAGAAGTGGCAATTGGTCTTTGCCTACTGCCTCGGA
XLOC_007358	5	TGCTGTTGACAGTGAGCGCCAGGCTAATGCTTTGTTCTTATAGTGAAGCCACAGATGTATAAGAACAAAGCATTAGCCTGTTGCCTACTGCCTCGGA
XLOC_007358	8	TGCTGTTGACAGTGAGCGCCAGGAGAAAAATTCACACTTATAGTGAAGCCACAGATGTATAAGTGTGAATTTTTCTCCTGATGCCTACTGCCTCGGA
XLOC_007358	11	TGCTGTTGACAGTGAGCGAGCGGCTCAACTTTACGTCTGATAGTGAAGCCACAGATGTATCAGACGTAAAGTTGAGCCGCGTGCCTACTGCCTCGGA
XLOC_007396	4	TGCTGTTGACAGTGAGCGCCCATAGATGAATGCTCATTTATAGTGAAGCCACAGATGTATAAATGAGCATTCATCTATGGATGCCTACTGCCTCGGA
XLOC_007396	6	TGCTGTTGACAGTGAGCGCGCACGAGTGATTTAAATTTTATAGTGAAGCCACAGATGTATAAAATTTAAATCACTCGTGCTTGCCTACTGCCTCGGA
XLOC_007396	10	TGCTGTTGACAGTGAGCGACTGAAGCTTACGGATATTTCATAGTGAAGCCACAGATGTATGAAATATCCGTAAGCTTCAGGTGCCTACTGCCTCGGA
XLOC_007396	15	TGCTGTTGACAGTGAGCGAACGAGTGATTTAAATTTTCTATAGTGAAGCCACAGATGTATAGAAAATTTAAATCACTCGTGTGCCTACTGCCTCGGA
XLOC_007396	16	TGCTGTTGACAGTGAGCGCCAAAACTCCATAGATGAATGATAGTGAAGCCACAGATGTATCATTCATCTATGGAGTTTTGATGCCTACTGCCTCGGA
XLOC_007661	1	TGCTGTTGACAGTGAGCGCGAAGGTGCTGTGTCTCTTAAATAGTGAAGCCACAGATGTATTTAAGAGACACAGCACCTTCTTGCCTACTGCCTCGGA
XLOC_007661	2	TGCTGTTGACAGTGAGCGCAGGGTCCACGACTCCTCTTTATAGTGAAGCCACAGATGTATAAAGAGGAGTCGTGGACCCTTTGCCTACTGCCTCGGA
XLOC_007661	5	TGCTGTTGACAGTGAGCGAGAGAGCCCCTCTTCCTGGTTATAGTGAAGCCACAGATGTATAACCAGGAAGAGGGGCTCTCCTGCCTACTGCCTCGGA
XLOC_007661	6	TGCTGTTGACAGTGAGCGAAAATGACTCAGCTGTAGTAAATAGTGAAGCCACAGATGTATTTACTACAGCTGAGTCATTTCTGCCTACTGCCTCGGA
XLOC_007661	8	TGCTGTTGACAGTGAGCGCGCAAACATCATTTAAAAGGAATAGTGAAGCCACAGATGTATTCCTTTTAAATGATGTTTGCTTGCCTACTGCCTCGGA
XLOC_007761	1	TGCTGTTGACAGTGAGCGCCCGGGAGATTCTGGATTCTTATAGTGAAGCCACAGATGTATAAGAATCCAGAATCTCCCGGATGCCTACTGCCTCGGA
XLOC_007761	5	TGCTGTTGACAGTGAGCGCCACCCTGAGAAGAAAGACATATAGTGAAGCCACAGATGTATATGTCTTTCTTCTCAGGGTGTTGCCTACTGCCTCGGA
XLOC_007761	8	TGCTGTTGACAGTGAGCGATGGAAGGAAGACAACAGTATATAGTGAAGCCACAGATGTATATACTGTTGTCTTCCTTCCACTGCCTACTGCCTCGGA
XLOC_007761	12	TGCTGTTGACAGTGAGCGAACACACACAAATTAATCTTAATAGTGAAGCCACAGATGTATTAAGATTAATTTGTGTGTGTGTGCCTACTGCCTCGGA
XLOC_007761	13	TGCTGTTGACAGTGAGCGCCACTGAGTCTGTCATCTTTGATAGTGAAGCCACAGATGTATCAAAGATGACAGACTCAGTGTTGCCTACTGCCTCGGA
XLOC_007832	3	TGCTGTTGACAGTGAGCGCCCTGCTTGAAGAACAGTTTGATAGTGAAGCCACAGATGTATCAAACTGTTCTTCAAGCAGGATGCCTACTGCCTCGGA
XLOC_007832	7	TGCTGTTGACAGTGAGCGATAGTGGAGAGAACTTGAAAAATAGTGAAGCCACAGATGTATTTTTCAAGTTCTCTCCACTAGTGCCTACTGCCTCGGA
XLOC_007832	14	TGCTGTTGACAGTGAGCGATCTAGTGGAGAGAACTTGAAATAGTGAAGCCACAGATGTATTTCAAGTTCTCTCCACTAGACTGCCTACTGCCTCGGA
XLOC_007832	20	TGCTGTTGACAGTGAGCGCGCTTGAAGAACAGTTTGAGAATAGTGAAGCCACAGATGTATTCTCAAACTGTTCTTCAAGCATGCCTACTGCCTCGGA
XLOC_007852	2	TGCTGTTGACAGTGAGCGACTCCAGCATGTTGTCACCATATAGTGAAGCCACAGATGTATATGGTGACAACATGCTGGAGCTGCCTACTGCCTCGGA
XLOC_007852	4	TGCTGTTGACAGTGAGCGCCCTCTGCATTCTCCTACTTCATAGTGAAGCCACAGATGTATGAAGTAGGAGAATGCAGAGGATGCCTACTGCCTCGGA
XLOC_007852	7	TGCTGTTGACAGTGAGCGAACCTAGATTTCCTCTGCATTATAGTGAAGCCACAGATGTATAATGCAGAGGAAATCTAGGTGTGCCTACTGCCTCGGA
XLOC_007852	8	TGCTGTTGACAGTGAGCGCGACATCCGGTGTTCTAACTGATAGTGAAGCCACAGATGTATCAGTTAGAACACCGGATGTCATGCCTACTGCCTCGGA
XLOC_007852	12	TGCTGTTGACAGTGAGCGCGACATCCGGTGTTCTAACTGATAGTGAAGCCACAGATGTATCAGTTAGAACACCGGATGTCATGCCTACTGCCTCGGA
XLOC_007931	1	TGCTGTTGACAGTGAGCGAGACAGCGATTCTTGGTTGTTATAGTGAAGCCACAGATGTATAACAACCAAGAATCGCTGTCCTGCCTACTGCCTCGGA
XLOC_007931	4	TGCTGTTGACAGTGAGCGCCCCTTCAATCTCTCTGGCTTATAGTGAAGCCACAGATGTATAAGCCAGAGAGATTGAAGGGTTGCCTACTGCCTCGGA
XLOC_007931	5	TGCTGTTGACAGTGAGCGACCAAGCTGTCTCTCTGCCTTATAGTGAAGCCACAGATGTATAAGGCAGAGAGACAGCTTGGCTGCCTACTGCCTCGGA
XLOC_007931	6	TGCTGTTGACAGTGAGCGAAGCTGCTGTAATGTAAACAAATAGTGAAGCCACAGATGTATTTGTTTACATTACAGCAGCTGTGCCTACTGCCTCGGA
XLOC_007931	11	TGCTGTTGACAGTGAGCGCCCGGCACTTGTTACATATGTATAGTGAAGCCACAGATGTATACATATGTAACAAGTGCCGGATGCCTACTGCCTCGGA
XLOC_008239	3	TGCTGTTGACAGTGAGCGCCAGTCCCAACACTCCAGTAAATAGTGAAGCCACAGATGTATTTACTGGAGTGTTGGGACTGATGCCTACTGCCTCGGA
XLOC_008239	4	TGCTGTTGACAGTGAGCGCGCCTTTCAAACTTCCTCTTCATAGTGAAGCCACAGATGTATGAAGAGGAAGTTTGAAAGGCATGCCTACTGCCTCGGA
XLOC_008239	5	TGCTGTTGACAGTGAGCGAAGACGTGTCGCTGATGTGTAATAGTGAAGCCACAGATGTATTACACATCAGCGACACGTCTGTGCCTACTGCCTCGGA
XLOC_008239	7	TGCTGTTGACAGTGAGCGCCACCACCCTGTCTCAACACAATAGTGAAGCCACAGATGTATTGTGTTGAGACAGGGTGGTGTTGCCTACTGCCTCGGA
XLOC_008239	10	TGCTGTTGACAGTGAGCGACAAGACAGATCCTAAGTTTCATAGTGAAGCCACAGATGTATGAAACTTAGGATCTGTCTTGGTGCCTACTGCCTCGGA
XLOC_008255	2	TGCTGTTGACAGTGAGCGCGCAGTCATCTCTTTTTCTTTATAGTGAAGCCACAGATGTATAAAGAAAAAGAGATGACTGCATGCCTACTGCCTCGGA
XLOC_008255	4	TGCTGTTGACAGTGAGCGAAGGGATGATACCTCTCTCTTATAGTGAAGCCACAGATGTATAAGAGAGAGGTATCATCCCTGTGCCTACTGCCTCGGA
XLOC_008255	10	TGCTGTTGACAGTGAGCGACCATGCCTTGCTTATTTCGTATAGTGAAGCCACAGATGTATACGAAATAAGCAAGGCATGGGTGCCTACTGCCTCGGA
XLOC_008255	12	TGCTGTTGACAGTGAGCGATCAGAACTCAGAGTTCATCTATAGTGAAGCCACAGATGTATAGATGAACTCTGAGTTCTGACTGCCTACTGCCTCGGA
XLOC_008255	15	TGCTGTTGACAGTGAGCGACAGGACCATGTCTCTGTCTTATAGTGAAGCCACAGATGTATAAGACAGAGACATGGTCCTGGTGCCTACTGCCTCGGA
XLOC_008283	1	TGCTGTTGACAGTGAGCGCACACACACTCTCACATACATATAGTGAAGCCACAGATGTATATGTATGTGAGAGTGTGTGTATGCCTACTGCCTCGGA
XLOC_008283	2	TGCTGTTGACAGTGAGCGCTGTACACACACTCTCACATAATAGTGAAGCCACAGATGTATTATGTGAGAGTGTGTGTACATTGCCTACTGCCTCGGA
XLOC_008283	8	TGCTGTTGACAGTGAGCGCCACACTCTCACATACATGTAATAGTGAAGCCACAGATGTATTACATGTATGTGAGAGTGTGTTGCCTACTGCCTCGGA
XLOC_008283	13	TGCTGTTGACAGTGAGCGCCAGAAGTAAGCTCTAAGCTAATAGTGAAGCCACAGATGTATTAGCTTAGAGCTTACTTCTGTTGCCTACTGCCTCGGA
XLOC_008283	14	TGCTGTTGACAGTGAGCGCCTGAGCATCTTAACTCTTTAATAGTGAAGCCACAGATGTATTAAAGAGTTAAGATGCTCAGATGCCTACTGCCTCGGA
XLOC_008417	2	TGCTGTTGACAGTGAGCGAAGAGACCTCAGTCCTAGTTAATAGTGAAGCCACAGATGTATTAACTAGGACTGAGGTCTCTGTGCCTACTGCCTCGGA
XLOC_008417	3	TGCTGTTGACAGTGAGCGCCACCTGTCTGCTTTAATTGTATAGTGAAGCCACAGATGTATACAATTAAAGCAGACAGGTGTTGCCTACTGCCTCGGA
XLOC_008417	15	TGCTGTTGACAGTGAGCGACAAGTCTAGAAGCTAACCATATAGTGAAGCCACAGATGTATATGGTTAGCTTCTAGACTTGCTGCCTACTGCCTCGGA
XLOC_008530	4	TGCTGTTGACAGTGAGCGCTGAGCACAAGTTCAGAAATGATAGTGAAGCCACAGATGTATCATTTCTGAACTTGTGCTCATTGCCTACTGCCTCGGA
XLOC_008530	7	TGCTGTTGACAGTGAGCGCCAGGTTGATCCTCTTGTTCCATAGTGAAGCCACAGATGTATGGAACAAGAGGATCAACCTGTTGCCTACTGCCTCGGA
XLOC_008530	8	TGCTGTTGACAGTGAGCGCCATGAGCACAAGTTCAGAAAATAGTGAAGCCACAGATGTATTTTCTGAACTTGTGCTCATGTTGCCTACTGCCTCGGA
XLOC_008530	9	TGCTGTTGACAGTGAGCGAAGCACAAGTTCAGAAATGAAATAGTGAAGCCACAGATGTATTTCATTTCTGAACTTGTGCTCTGCCTACTGCCTCGGA
XLOC_008530	18	TGCTGTTGACAGTGAGCGAGACTCACATGAGCACAAGTTATAGTGAAGCCACAGATGTATAACTTGTGCTCATGTGAGTCCTGCCTACTGCCTCGGA
XLOC_008609	2	TGCTGTTGACAGTGAGCGACCTAATGACTCACTCACTTAATAGTGAAGCCACAGATGTATTAAGTGAGTGAGTCATTAGGGTGCCTACTGCCTCGGA
XLOC_008609	3	TGCTGTTGACAGTGAGCGAGACAAGATTTTCTCCATGTTATAGTGAAGCCACAGATGTATAACATGGAGAAAATCTTGTCCTGCCTACTGCCTCGGA
XLOC_008609	4	TGCTGTTGACAGTGAGCGCCCATACAATTGCACTTCTTTATAGTGAAGCCACAGATGTATAAAGAAGTGCAATTGTATGGATGCCTACTGCCTCGGA
XLOC_008609	6	TGCTGTTGACAGTGAGCGCGGAGACCAAGCTTCAACGCAATAGTGAAGCCACAGATGTATTGCGTTGAAGCTTGGTCTCCATGCCTACTGCCTCGGA
XLOC_008609	9	TGCTGTTGACAGTGAGCGCAGACGGTGAAGGTCTTTTTAATAGTGAAGCCACAGATGTATTAAAAAGACCTTCACCGTCTTTGCCTACTGCCTCGGA
XLOC_008663	1	TGCTGTTGACAGTGAGCGAAAGCGACATACTAAACTGTTATAGTGAAGCCACAGATGTATAACAGTTTAGTATGTCGCTTCTGCCTACTGCCTCGGA
XLOC_008663	3	TGCTGTTGACAGTGAGCGATTCGAGGTTTCTTCAAACTAATAGTGAAGCCACAGATGTATTAGTTTGAAGAAACCTCGAACTGCCTACTGCCTCGGA
XLOC_008663	5	TGCTGTTGACAGTGAGCGCCTTGGGTCTTCTGCAGCTTTATAGTGAAGCCACAGATGTATAAAGCTGCAGAAGACCCAAGTTGCCTACTGCCTCGGA
XLOC_008663	8	TGCTGTTGACAGTGAGCGCTAGGATGCAGAGACTGCCTTATAGTGAAGCCACAGATGTATAAGGCAGTCTCTGCATCCTAATGCCTACTGCCTCGGA
XLOC_008663	13	TGCTGTTGACAGTGAGCGCGCAGAGACTGCCTTTCTTTTATAGTGAAGCCACAGATGTATAAAAGAAAGGCAGTCTCTGCATGCCTACTGCCTCGGA
XLOC_008730	3	TGCTGTTGACAGTGAGCGCCACTGCTGAGTTGCTGTAATATAGTGAAGCCACAGATGTATATTACAGCAACTCAGCAGTGTTGCCTACTGCCTCGGA
XLOC_008730	4	TGCTGTTGACAGTGAGCGCGCATTGTGTTGTGATATCTTATAGTGAAGCCACAGATGTATAAGATATCACAACACAATGCATGCCTACTGCCTCGGA
XLOC_008730	6	TGCTGTTGACAGTGAGCGATGTTGTGATATCTTCATTATATAGTGAAGCCACAGATGTATATAATGAAGATATCACAACACTGCCTACTGCCTCGGA
XLOC_008730	8	TGCTGTTGACAGTGAGCGCTCAGAGCCTCATTTCTTTTGATAGTGAAGCCACAGATGTATCAAAAGAAATGAGGCTCTGAATGCCTACTGCCTCGGA
XLOC_008730	10	TGCTGTTGACAGTGAGCGCTCCATGCATTGTGTTGTGATATAGTGAAGCCACAGATGTATATCACAACACAATGCATGGAATGCCTACTGCCTCGGA
XLOC_008819	1	TGCTGTTGACAGTGAGCGCCAGAGACTCAGTAGAAGTTGATAGTGAAGCCACAGATGTATCAACTTCTACTGAGTCTCTGTTGCCTACTGCCTCGGA
XLOC_008819	4	TGCTGTTGACAGTGAGCGCCCTGTGTTCTCAGATGTCATATAGTGAAGCCACAGATGTATATGACATCTGAGAACACAGGATGCCTACTGCCTCGGA
XLOC_008819	6	TGCTGTTGACAGTGAGCGATGCCTGCATGCCACCATCTTATAGTGAAGCCACAGATGTATAAGATGGTGGCATGCAGGCAGTGCCTACTGCCTCGGA
XLOC_008819	8	TGCTGTTGACAGTGAGCGAAGATGTAGAACTCTTAGCTAATAGTGAAGCCACAGATGTATTAGCTAAGAGTTCTACATCTGTGCCTACTGCCTCGGA
XLOC_008819	9	TGCTGTTGACAGTGAGCGCCCATGGCTCACTGATGAGGAATAGTGAAGCCACAGATGTATTCCTCATCAGTGAGCCATGGATGCCTACTGCCTCGGA
XLOC_009000	3	TGCTGTTGACAGTGAGCGCTGAGATCGTTTTACTGCAAAATAGTGAAGCCACAGATGTATTTTGCAGTAAAACGATCTCAATGCCTACTGCCTCGGA
XLOC_009000	11	TGCTGTTGACAGTGAGCGAACCTCGGCACTCTTCAATTGATAGTGAAGCCACAGATGTATCAATTGAAGAGTGCCGAGGTGTGCCTACTGCCTCGGA
XLOC_009065	2	TGCTGTTGACAGTGAGCGAGACGATCACTTCGGAATCTTATAGTGAAGCCACAGATGTATAAGATTCCGAAGTGATCGTCCTGCCTACTGCCTCGGA
XLOC_009065	8	TGCTGTTGACAGTGAGCGCACGAGAAGAAACTTTCAGAAATAGTGAAGCCACAGATGTATTTCTGAAAGTTTCTTCTCGTATGCCTACTGCCTCGGA
XLOC_009065	9	TGCTGTTGACAGTGAGCGAGGTGGATTTTGTTTTCTCTGATAGTGAAGCCACAGATGTATCAGAGAAAACAAAATCCACCCTGCCTACTGCCTCGGA
XLOC_009065	10	TGCTGTTGACAGTGAGCGCGCCCAACCTTGTAGGATTTGATAGTGAAGCCACAGATGTATCAAATCCTACAAGGTTGGGCATGCCTACTGCCTCGGA
XLOC_009065	18	TGCTGTTGACAGTGAGCGCCACTTCGGAATCTTAAAAAAATAGTGAAGCCACAGATGTATTTTTTTAAGATTCCGAAGTGATGCCTACTGCCTCGGA
XLOC_009091	6	TGCTGTTGACAGTGAGCGCTACATACATGCTGTTAGGAGATAGTGAAGCCACAGATGTATCTCCTAACAGCATGTATGTAATGCCTACTGCCTCGGA
XLOC_009091	9	TGCTGTTGACAGTGAGCGATCCTTGAAAAGCTCTGTCTTATAGTGAAGCCACAGATGTATAAGACAGAGCTTTTCAAGGACTGCCTACTGCCTCGGA
XLOC_009091	10	TGCTGTTGACAGTGAGCGATGAATACTCTTACATACATGATAGTGAAGCCACAGATGTATCATGTATGTAAGAGTATTCAGTGCCTACTGCCTCGGA
XLOC_009091	11	TGCTGTTGACAGTGAGCGCGTGGGACATGCGACATCTTTATAGTGAAGCCACAGATGTATAAAGATGTCGCATGTCCCACTTGCCTACTGCCTCGGA
XLOC_009091	15	TGCTGTTGACAGTGAGCGCCATGCGACATCTTTTGTGAGATAGTGAAGCCACAGATGTATCTCACAAAAGATGTCGCATGTTGCCTACTGCCTCGGA
XLOC_009239	13	TGCTGTTGACAGTGAGCGAGGCTTGCAAGAACATGGCTTATAGTGAAGCCACAGATGTATAAGCCATGTTCTTGCAAGCCGTGCCTACTGCCTCGGA
XLOC_009239	16	TGCTGTTGACAGTGAGCGCCCGCCGGGTTCTCACTCCCTATAGTGAAGCCACAGATGTATAGGGAGTGAGAACCCGGCGGATGCCTACTGCCTCGGA
XLOC_009243	1	TGCTGTTGACAGTGAGCGCCACAGACACAGAAAAATCAGATAGTGAAGCCACAGATGTATCTGATTTTTCTGTGTCTGTGTTGCCTACTGCCTCGGA
XLOC_009243	2	TGCTGTTGACAGTGAGCGCGACTTTGCAGTGTCTGCTTTATAGTGAAGCCACAGATGTATAAAGCAGACACTGCAAAGTCATGCCTACTGCCTCGGA
XLOC_009243	6	TGCTGTTGACAGTGAGCGACCCCATGACACAGTTGATCGATAGTGAAGCCACAGATGTATCGATCAACTGTGTCATGGGGCTGCCTACTGCCTCGGA
XLOC_009243	7	TGCTGTTGACAGTGAGCGCCGGATGCTCTCTTACAGCTGATAGTGAAGCCACAGATGTATCAGCTGTAAGAGAGCATCCGATGCCTACTGCCTCGGA
XLOC_009243	9	TGCTGTTGACAGTGAGCGCGCTTTCTAAGTTTCAAAGTGATAGTGAAGCCACAGATGTATCACTTTGAAACTTAGAAAGCATGCCTACTGCCTCGGA
XLOC_009332	4	TGCTGTTGACAGTGAGCGAGCTCTTGATGCTGTTGAATCATAGTGAAGCCACAGATGTATGATTCAACAGCATCAAGAGCCTGCCTACTGCCTCGGA
XLOC_009332	5	TGCTGTTGACAGTGAGCGCGGACGACGTGCGCTTTCTAAATAGTGAAGCCACAGATGTATTTAGAAAGCGCACGTCGTCCATGCCTACTGCCTCGGA
XLOC_009332	6	TGCTGTTGACAGTGAGCGCGGCTTTTATCTCCTCACCCTATAGTGAAGCCACAGATGTATAGGGTGAGGAGATAAAAGCCATGCCTACTGCCTCGGA
XLOC_009332	12	TGCTGTTGACAGTGAGCGATGCAGCTCTGCTTTCACTTTATAGTGAAGCCACAGATGTATAAAGTGAAAGCAGAGCTGCACTGCCTACTGCCTCGGA
XLOC_009332	16	TGCTGTTGACAGTGAGCGCTGCACCTCAGCTTCAGACTTATAGTGAAGCCACAGATGTATAAGTCTGAAGCTGAGGTGCAATGCCTACTGCCTCGGA
XLOC_009350	3	TGCTGTTGACAGTGAGCGACCATAGGTTAATTCAGTCTGATAGTGAAGCCACAGATGTATCAGACTGAATTAACCTATGGGTGCCTACTGCCTCGGA
XLOC_009350	5	TGCTGTTGACAGTGAGCGCACCTCCCTAACAGTTGTGCAATAGTGAAGCCACAGATGTATTGCACAACTGTTAGGGAGGTATGCCTACTGCCTCGGA
XLOC_009350	6	TGCTGTTGACAGTGAGCGACCTAACAGTTGTGCAATAAAATAGTGAAGCCACAGATGTATTTTATTGCACAACTGTTAGGGTGCCTACTGCCTCGGA
XLOC_009350	9	TGCTGTTGACAGTGAGCGATGTCCATCTCTTTCCAGTTTATAGTGAAGCCACAGATGTATAAACTGGAAAGAGATGGACAGTGCCTACTGCCTCGGA
XLOC_009350	13	TGCTGTTGACAGTGAGCGCCCTCTCCACTCTGACAACAGATAGTGAAGCCACAGATGTATCTGTTGTCAGAGTGGAGAGGATGCCTACTGCCTCGGA
XLOC_009439	1	TGCTGTTGACAGTGAGCGCCAGCTTCATCATCTCAGAATATAGTGAAGCCACAGATGTATATTCTGAGATGATGAAGCTGATGCCTACTGCCTCGGA
XLOC_009439	2	TGCTGTTGACAGTGAGCGACCTGGAAACTCTTCCAAGTTATAGTGAAGCCACAGATGTATAACTTGGAAGAGTTTCCAGGCTGCCTACTGCCTCGGA
XLOC_009439	4	TGCTGTTGACAGTGAGCGAAACGATCTCATCTCCAGCTTATAGTGAAGCCACAGATGTATAAGCTGGAGATGAGATCGTTGTGCCTACTGCCTCGGA
XLOC_009439	5	TGCTGTTGACAGTGAGCGCACGATCTCATCTCCAGCTTTATAGTGAAGCCACAGATGTATAAAGCTGGAGATGAGATCGTTTGCCTACTGCCTCGGA
XLOC_009439	8	TGCTGTTGACAGTGAGCGCCTTCCCCATTCTTAAGCTTTATAGTGAAGCCACAGATGTATAAAGCTTAAGAATGGGGAAGATGCCTACTGCCTCGGA
XLOC_009665	1	TGCTGTTGACAGTGAGCGACAGAACATTCTTGAAAAGCAATAGTGAAGCCACAGATGTATTGCTTTTCAAGAATGTTCTGCTGCCTACTGCCTCGGA
XLOC_009665	6	TGCTGTTGACAGTGAGCGACAGCTGCTCACCACAATCACATAGTGAAGCCACAGATGTATGTGATTGTGGTGAGCAGCTGCTGCCTACTGCCTCGGA
XLOC_009665	8	TGCTGTTGACAGTGAGCGCGACACAGTTAGAGTCATTTTATAGTGAAGCCACAGATGTATAAAATGACTCTAACTGTGTCATGCCTACTGCCTCGGA
XLOC_009665	14	TGCTGTTGACAGTGAGCGCGGACTACAAGCTATAAATGGATAGTGAAGCCACAGATGTATCCATTTATAGCTTGTAGTCCATGCCTACTGCCTCGGA
XLOC_009665	15	TGCTGTTGACAGTGAGCGCTGTCCACTCTCGCTTCTCTGATAGTGAAGCCACAGATGTATCAGAGAAGCGAGAGTGGACATTGCCTACTGCCTCGGA
XLOC_009783	2	TGCTGTTGACAGTGAGCGAGACAAGTGAATGCATCTCATATAGTGAAGCCACAGATGTATATGAGATGCATTCACTTGTCCTGCCTACTGCCTCGGA
XLOC_009783	5	TGCTGTTGACAGTGAGCGCCAAGTGAATGCATCTCATAAATAGTGAAGCCACAGATGTATTTATGAGATGCATTCACTTGTTGCCTACTGCCTCGGA
XLOC_009783	15	TGCTGTTGACAGTGAGCGACACAGGAAGAAGACTGTCTGATAGTGAAGCCACAGATGTATCAGACAGTCTTCTTCCTGTGGTGCCTACTGCCTCGGA
XLOC_009783	18	TGCTGTTGACAGTGAGCGATGCCGTGGAAGAAGAAGAATATAGTGAAGCCACAGATGTATATTCTTCTTCTTCCACGGCAGTGCCTACTGCCTCGGA
XLOC_009860	3	TGCTGTTGACAGTGAGCGCGAGACTCTTAATGGTGTCTTATAGTGAAGCCACAGATGTATAAGACACCATTAAGAGTCTCTTGCCTACTGCCTCGGA
XLOC_009860	8	TGCTGTTGACAGTGAGCGACCAAGTCCTTCCCAAACTCTATAGTGAAGCCACAGATGTATAGAGTTTGGGAAGGACTTGGGTGCCTACTGCCTCGGA
XLOC_009860	9	TGCTGTTGACAGTGAGCGCCCTTCCCAAACTCTTGACCAATAGTGAAGCCACAGATGTATTGGTCAAGAGTTTGGGAAGGATGCCTACTGCCTCGGA
XLOC_009860	14	TGCTGTTGACAGTGAGCGATGTCTTCTTCAACTTGAAAAATAGTGAAGCCACAGATGTATTTTTCAAGTTGAAGAAGACACTGCCTACTGCCTCGGA
XLOC_009860	16	TGCTGTTGACAGTGAGCGACCTACACAAGTTCTTTCCTGATAGTGAAGCCACAGATGTATCAGGAAAGAACTTGTGTAGGCTGCCTACTGCCTCGGA
XLOC_009889	1	TGCTGTTGACAGTGAGCGCGAAATCCAGACAACAGTTTTATAGTGAAGCCACAGATGTATAAAACTGTTGTCTGGATTTCTTGCCTACTGCCTCGGA
XLOC_009889	2	TGCTGTTGACAGTGAGCGAGAACAAGTCATAACCTCTTTATAGTGAAGCCACAGATGTATAAAGAGGTTATGACTTGTTCCTGCCTACTGCCTCGGA
XLOC_009889	4	TGCTGTTGACAGTGAGCGACAGCTGGAGAATTCAAGTAGATAGTGAAGCCACAGATGTATCTACTTGAATTCTCCAGCTGGTGCCTACTGCCTCGGA
XLOC_009889	5	TGCTGTTGACAGTGAGCGCCCCTTTGCTCTCTCCTTCTTATAGTGAAGCCACAGATGTATAAGAAGGAGAGAGCAAAGGGATGCCTACTGCCTCGGA
XLOC_009889	6	TGCTGTTGACAGTGAGCGACCTAAACCCTCTTCAAAGGTATAGTGAAGCCACAGATGTATACCTTTGAAGAGGGTTTAGGGTGCCTACTGCCTCGGA
XLOC_010051	1	TGCTGTTGACAGTGAGCGCCCTACAGATCCTCTCATCTCATAGTGAAGCCACAGATGTATGAGATGAGAGGATCTGTAGGTTGCCTACTGCCTCGGA
XLOC_010051	2	TGCTGTTGACAGTGAGCGCCCCCGATCACTTTCATTTTGATAGTGAAGCCACAGATGTATCAAAATGAAAGTGATCGGGGATGCCTACTGCCTCGGA
XLOC_010051	5	TGCTGTTGACAGTGAGCGCTACTGCCATGCTATCACGCTATAGTGAAGCCACAGATGTATAGCGTGATAGCATGGCAGTAATGCCTACTGCCTCGGA
XLOC_010051	9	TGCTGTTGACAGTGAGCGCGGTGACCGAGCTCATGCTTTATAGTGAAGCCACAGATGTATAAAGCATGAGCTCGGTCACCATGCCTACTGCCTCGGA
XLOC_010051	10	TGCTGTTGACAGTGAGCGAGAGCAGCTGGTTGTAATTATATAGTGAAGCCACAGATGTATATAATTACAACCAGCTGCTCCTGCCTACTGCCTCGGA
XLOC_010141	2	TGCTGTTGACAGTGAGCGAACGGAAAGAAATAATGAAAAATAGTGAAGCCACAGATGTATTTTTCATTATTTCTTTCCGTGTGCCTACTGCCTCGGA
XLOC_010141	4	TGCTGTTGACAGTGAGCGCCAGCACGGAAAGAAATAATGATAGTGAAGCCACAGATGTATCATTATTTCTTTCCGTGCTGTTGCCTACTGCCTCGGA
XLOC_010141	5	TGCTGTTGACAGTGAGCGCGCACGGAAAGAAATAATGAAATAGTGAAGCCACAGATGTATTTCATTATTTCTTTCCGTGCTTGCCTACTGCCTCGGA
XLOC_010141	10	TGCTGTTGACAGTGAGCGCCCCACCCCTTCTGCTTATGTATAGTGAAGCCACAGATGTATACATAAGCAGAAGGGGTGGGATGCCTACTGCCTCGGA
XLOC_010141	11	TGCTGTTGACAGTGAGCGCCCAGAGAGTTAGGTAAAAATATAGTGAAGCCACAGATGTATATTTTTACCTAACTCTCTGGATGCCTACTGCCTCGGA
XLOC_010450	1	TGCTGTTGACAGTGAGCGATCTAGCTCTCATTCTGTCTCATAGTGAAGCCACAGATGTATGAGACAGAATGAGAGCTAGAGTGCCTACTGCCTCGGA
XLOC_010450	2	TGCTGTTGACAGTGAGCGACCTTTCTTCTCTTCTCTTTTATAGTGAAGCCACAGATGTATAAAAGAGAAGAGAAGAAAGGGTGCCTACTGCCTCGGA
XLOC_010450	6	TGCTGTTGACAGTGAGCGCAGCTCTCATTCTGTCTCGCCATAGTGAAGCCACAGATGTATGGCGAGACAGAATGAGAGCTATGCCTACTGCCTCGGA
XLOC_010450	8	TGCTGTTGACAGTGAGCGATCTGCCTCTGCCTCTTCTCTATAGTGAAGCCACAGATGTATAGAGAAGAGGCAGAGGCAGACTGCCTACTGCCTCGGA
XLOC_010450	11	TGCTGTTGACAGTGAGCGCCCAAACGCAGTGACTTTTATATAGTGAAGCCACAGATGTATATAAAAGTCACTGCGTTTGGATGCCTACTGCCTCGGA
XLOC_010562	2	TGCTGTTGACAGTGAGCGACACAACCTCTGTTATATCTTATAGTGAAGCCACAGATGTATAAGATATAACAGAGGTTGTGCTGCCTACTGCCTCGGA
XLOC_010562	5	TGCTGTTGACAGTGAGCGCGCTTGCATCTCAGTTTTGACATAGTGAAGCCACAGATGTATGTCAAAACTGAGATGCAAGCATGCCTACTGCCTCGGA
XLOC_010562	6	TGCTGTTGACAGTGAGCGCGGAATGAAAACTTGGTCCTTATAGTGAAGCCACAGATGTATAAGGACCAAGTTTTCATTCCATGCCTACTGCCTCGGA
XLOC_010562	7	TGCTGTTGACAGTGAGCGCACAAAACCAACAGCTTTTCTATAGTGAAGCCACAGATGTATAGAAAAGCTGTTGGTTTTGTTTGCCTACTGCCTCGGA
XLOC_010562	9	TGCTGTTGACAGTGAGCGCTGACCTTATGATAAGATTTAATAGTGAAGCCACAGATGTATTAAATCTTATCATAAGGTCATTGCCTACTGCCTCGGA
XLOC_010608	7	TGCTGTTGACAGTGAGCGCGTTACTGGAAGTCAAAGCTTATAGTGAAGCCACAGATGTATAAGCTTTGACTTCCAGTAACTTGCCTACTGCCTCGGA
XLOC_010608	16	TGCTGTTGACAGTGAGCGAAGTTACTGGAAGTCAAAGCTATAGTGAAGCCACAGATGTATAGCTTTGACTTCCAGTAACTGTGCCTACTGCCTCGGA
XLOC_010608	19	TGCTGTTGACAGTGAGCGCGGCGGGTCATCCTTCTCCTCATAGTGAAGCCACAGATGTATGAGGAGAAGGATGACCCGCCTTGCCTACTGCCTCGGA
XLOC_011053	1	TGCTGTTGACAGTGAGCGCGGACAAGATCTATCTGCATTATAGTGAAGCCACAGATGTATAATGCAGATAGATCTTGTCCTTGCCTACTGCCTCGGA
XLOC_011053	8	TGCTGTTGACAGTGAGCGCCAGATTCATGAAAATATAATATAGTGAAGCCACAGATGTATATTATATTTTCATGAATCTGATGCCTACTGCCTCGGA
XLOC_011053	14	TGCTGTTGACAGTGAGCGACAGATACAGCCAACTATCATATAGTGAAGCCACAGATGTATATGATAGTTGGCTGTATCTGCTGCCTACTGCCTCGGA
XLOC_011053	17	TGCTGTTGACAGTGAGCGCACATTACAAGGACAAGATCTATAGTGAAGCCACAGATGTATAGATCTTGTCCTTGTAATGTTTGCCTACTGCCTCGGA
XLOC_011053	18	TGCTGTTGACAGTGAGCGCGCCATGAGGTAAGCCACTTTATAGTGAAGCCACAGATGTATAAAGTGGCTTACCTCATGGCATGCCTACTGCCTCGGA
XLOC_011299	5	TGCTGTTGACAGTGAGCGAAGTTAACATGAACTTGTATAATAGTGAAGCCACAGATGTATTATACAAGTTCATGTTAACTGTGCCTACTGCCTCGGA
XLOC_011299	8	TGCTGTTGACAGTGAGCGCCCCAGGTGTTCTATAAGTTTATAGTGAAGCCACAGATGTATAAACTTATAGAACACCTGGGTTGCCTACTGCCTCGGA
XLOC_011299	11	TGCTGTTGACAGTGAGCGCGGTGCTCGAGAACTTGTCTAATAGTGAAGCCACAGATGTATTAGACAAGTTCTCGAGCACCTTGCCTACTGCCTCGGA
XLOC_011299	13	TGCTGTTGACAGTGAGCGCCAGTTAACATGAACTTGTATATAGTGAAGCCACAGATGTATATACAAGTTCATGTTAACTGTTGCCTACTGCCTCGGA
XLOC_011299	17	TGCTGTTGACAGTGAGCGCAGTCCTCAAAATAATACAGAATAGTGAAGCCACAGATGTATTCTGTATTATTTTGAGGACTTTGCCTACTGCCTCGGA
XLOC_011739	1	TGCTGTTGACAGTGAGCGCCCCCAACTCTCTTTTGACTTATAGTGAAGCCACAGATGTATAAGTCAAAAGAGAGTTGGGGATGCCTACTGCCTCGGA
XLOC_011739	3	TGCTGTTGACAGTGAGCGACAGATGTGATGACAGTACTTATAGTGAAGCCACAGATGTATAAGTACTGTCATCACATCTGGTGCCTACTGCCTCGGA
XLOC_011739	5	TGCTGTTGACAGTGAGCGATGCTTGAAGATGTTATTAATATAGTGAAGCCACAGATGTATATTAATAACATCTTCAAGCAGTGCCTACTGCCTCGGA
XLOC_011739	9	TGCTGTTGACAGTGAGCGCGACTGGCATTCTGTCATCCCATAGTGAAGCCACAGATGTATGGGATGACAGAATGCCAGTCATGCCTACTGCCTCGGA
XLOC_011739	11	TGCTGTTGACAGTGAGCGATAGGAGATTTCTTACTGCTAATAGTGAAGCCACAGATGTATTAGCAGTAAGAAATCTCCTACTGCCTACTGCCTCGGA
XLOC_011799	1	TGCTGTTGACAGTGAGCGCCACAACGATTATTTTTTCATATAGTGAAGCCACAGATGTATATGAAAAAATAATCGTTGTGATGCCTACTGCCTCGGA
XLOC_011799	4	TGCTGTTGACAGTGAGCGACAGAGATGTGCCTACTTGTAATAGTGAAGCCACAGATGTATTACAAGTAGGCACATCTCTGGTGCCTACTGCCTCGGA
XLOC_011799	5	TGCTGTTGACAGTGAGCGCCACGAGGCAATTCCTGTCTGATAGTGAAGCCACAGATGTATCAGACAGGAATTGCCTCGTGTTGCCTACTGCCTCGGA
XLOC_011799	8	TGCTGTTGACAGTGAGCGAGCCTGGAACTCTGTCTGTAGATAGTGAAGCCACAGATGTATCTACAGACAGAGTTCCAGGCCTGCCTACTGCCTCGGA
XLOC_011799	11	TGCTGTTGACAGTGAGCGCCACAGCCACACACCTGCCTTATAGTGAAGCCACAGATGTATAAGGCAGGTGTGTGGCTGTGATGCCTACTGCCTCGGA
XLOC_011887	1	TGCTGTTGACAGTGAGCGCGGAGCCTGTTGTGCTTGTAGATAGTGAAGCCACAGATGTATCTACAAGCACAACAGGCTCCATGCCTACTGCCTCGGA
XLOC_011887	2	TGCTGTTGACAGTGAGCGCCCGTGTCCGAAGTCTGTTTAATAGTGAAGCCACAGATGTATTAAACAGACTTCGGACACGGATGCCTACTGCCTCGGA
XLOC_011887	4	TGCTGTTGACAGTGAGCGCCCACAACAAACTCACAGGTAATAGTGAAGCCACAGATGTATTACCTGTGAGTTTGTTGTGGATGCCTACTGCCTCGGA
XLOC_011887	8	TGCTGTTGACAGTGAGCGCCAAGAAGACCAACAAAGTCAATAGTGAAGCCACAGATGTATTGACTTTGTTGGTCTTCTTGTTGCCTACTGCCTCGGA
XLOC_011887	9	TGCTGTTGACAGTGAGCGAACATATGGAACAGATATGTAATAGTGAAGCCACAGATGTATTACATATCTGTTCCATATGTGTGCCTACTGCCTCGGA
XLOC_011967	4	TGCTGTTGACAGTGAGCGCAAAGAGCAGAGTAATGTCTAATAGTGAAGCCACAGATGTATTAGACATTACTCTGCTCTTTATGCCTACTGCCTCGGA
XLOC_011967	5	TGCTGTTGACAGTGAGCGAATACCTGATGATTTCAGCAAATAGTGAAGCCACAGATGTATTTGCTGAAATCATCAGGTATCTGCCTACTGCCTCGGA
XLOC_011967	13	TGCTGTTGACAGTGAGCGAAGACACCATGCTGTTGAATGATAGTGAAGCCACAGATGTATCATTCAACAGCATGGTGTCTCTGCCTACTGCCTCGGA
XLOC_011967	15	TGCTGTTGACAGTGAGCGCAATGTCCAAGTGTAAGCCAAATAGTGAAGCCACAGATGTATTTGGCTTACACTTGGACATTATGCCTACTGCCTCGGA
XLOC_011967	18	TGCTGTTGACAGTGAGCGCCCTCCCAAACTTGTCTTTGGATAGTGAAGCCACAGATGTATCCAAAGACAAGTTTGGGAGGATGCCTACTGCCTCGGA
XLOC_012046	3	TGCTGTTGACAGTGAGCGACTCTGGCATCATGTCTACGCATAGTGAAGCCACAGATGTATGCGTAGACATGATGCCAGAGCTGCCTACTGCCTCGGA
XLOC_012046	18	TGCTGTTGACAGTGAGCGCTGAGAGAACGCTTTTTCTGAATAGTGAAGCCACAGATGTATTCAGAAAAAGCGTTCTCTCATTGCCTACTGCCTCGGA
XLOC_012046	20	TGCTGTTGACAGTGAGCGCTGTCCGCCGAATGTTGTGTAATAGTGAAGCCACAGATGTATTACACAACATTCGGCGGACATTGCCTACTGCCTCGGA
XLOC_012326	3	TGCTGTTGACAGTGAGCGCAGATGTGATGACTCAGGAAAATAGTGAAGCCACAGATGTATTTTCCTGAGTCATCACATCTTTGCCTACTGCCTCGGA
XLOC_012326	4	TGCTGTTGACAGTGAGCGACCAGCAGAAACAGCTAGTTGATAGTGAAGCCACAGATGTATCAACTAGCTGTTTCTGCTGGCTGCCTACTGCCTCGGA
XLOC_012326	5	TGCTGTTGACAGTGAGCGAAGATGTGAGTCTTCAGATGTATAGTGAAGCCACAGATGTATACATCTGAAGACTCACATCTCTGCCTACTGCCTCGGA
XLOC_012326	8	TGCTGTTGACAGTGAGCGCGCATGGTGCCTGTTTCTTTTATAGTGAAGCCACAGATGTATAAAAGAAACAGGCACCATGCTTGCCTACTGCCTCGGA
XLOC_012326	14	TGCTGTTGACAGTGAGCGACAAGTAAACTCTTCTATAAAATAGTGAAGCCACAGATGTATTTTATAGAAGAGTTTACTTGGTGCCTACTGCCTCGGA
XLOC_012342	5	TGCTGTTGACAGTGAGCGAGCCTACTGTCAAGAAATGAAATAGTGAAGCCACAGATGTATTTCATTTCTTGACAGTAGGCGTGCCTACTGCCTCGGA
XLOC_012342	8	TGCTGTTGACAGTGAGCGCCACAGCCACGTCCAAAGCTGATAGTGAAGCCACAGATGTATCAGCTTTGGACGTGGCTGTGATGCCTACTGCCTCGGA
XLOC_012342	13	TGCTGTTGACAGTGAGCGATACCGCCTACTGTCAAGAAAATAGTGAAGCCACAGATGTATTTTCTTGACAGTAGGCGGTAGTGCCTACTGCCTCGGA
XLOC_012342	20	TGCTGTTGACAGTGAGCGCCCAAAGCTGTGTTCCTCTTTATAGTGAAGCCACAGATGTATAAAGAGGAACACAGCTTTGGATGCCTACTGCCTCGGA
XLOC_012422	2	TGCTGTTGACAGTGAGCGAGGGTCTCTTACCGTCACCAGATAGTGAAGCCACAGATGTATCTGGTGACGGTAAGAGACCCGTGCCTACTGCCTCGGA
XLOC_012422	8	TGCTGTTGACAGTGAGCGATATGACGTCACTCATCTCTAATAGTGAAGCCACAGATGTATTAGAGATGAGTGACGTCATACTGCCTACTGCCTCGGA
XLOC_012422	11	TGCTGTTGACAGTGAGCGCCTCTACCCACCTGCTTCCCTATAGTGAAGCCACAGATGTATAGGGAAGCAGGTGGGTAGAGATGCCTACTGCCTCGGA
XLOC_012471	7	TGCTGTTGACAGTGAGCGCCACATGGCAAGCAAAAGAAGATAGTGAAGCCACAGATGTATCTTCTTTTGCTTGCCATGTGTTGCCTACTGCCTCGGA
XLOC_012471	10	TGCTGTTGACAGTGAGCGCGCACCACACATGGCAAGCAAATAGTGAAGCCACAGATGTATTTGCTTGCCATGTGTGGTGCTTGCCTACTGCCTCGGA
XLOC_012471	18	TGCTGTTGACAGTGAGCGCTTCAACACTCTTCCTGACTTATAGTGAAGCCACAGATGTATAAGTCAGGAAGAGTGTTGAATTGCCTACTGCCTCGGA
XLOC_012471	19	TGCTGTTGACAGTGAGCGACTCAAACACCTGCACACATAATAGTGAAGCCACAGATGTATTATGTGTGCAGGTGTTTGAGGTGCCTACTGCCTCGGA
XLOC_012495	2	TGCTGTTGACAGTGAGCGAACACCTCTCTCCTCTGTCTTATAGTGAAGCCACAGATGTATAAGACAGAGGAGAGAGGTGTGTGCCTACTGCCTCGGA
XLOC_012495	6	TGCTGTTGACAGTGAGCGAGGACATTAAACTACTGTTTGATAGTGAAGCCACAGATGTATCAAACAGTAGTTTAATGTCCCTGCCTACTGCCTCGGA
XLOC_012495	8	TGCTGTTGACAGTGAGCGCCATGTGTGAAAAATAACTTCATAGTGAAGCCACAGATGTATGAAGTTATTTTTCACACATGTTGCCTACTGCCTCGGA
XLOC_012495	14	TGCTGTTGACAGTGAGCGCGACCAACTTGAGTTCACATGATAGTGAAGCCACAGATGTATCATGTGAACTCAAGTTGGTCTTGCCTACTGCCTCGGA
XLOC_012495	16	TGCTGTTGACAGTGAGCGCGCCGCAGCTGTTTCTCCTTCATAGTGAAGCCACAGATGTATGAAGGAGAAACAGCTGCGGCATGCCTACTGCCTCGGA
XLOC_012637	6	TGCTGTTGACAGTGAGCGCGCCCTGTGTCCTTCTGTCTCATAGTGAAGCCACAGATGTATGAGACAGAAGGACACAGGGCATGCCTACTGCCTCGGA
XLOC_012637	10	TGCTGTTGACAGTGAGCGATGAGGCGTCCTCTTTGTCTGATAGTGAAGCCACAGATGTATCAGACAAAGAGGACGCCTCAGTGCCTACTGCCTCGGA
XLOC_012637	13	TGCTGTTGACAGTGAGCGCGAGATGTAGCATCAAACATTATAGTGAAGCCACAGATGTATAATGTTTGATGCTACATCTCTTGCCTACTGCCTCGGA
XLOC_012637	14	TGCTGTTGACAGTGAGCGATCTACCGGACTGCATCTCTTATAGTGAAGCCACAGATGTATAAGAGATGCAGTCCGGTAGAGTGCCTACTGCCTCGGA
XLOC_012637	20	TGCTGTTGACAGTGAGCGCAGAGATGTAGCATCAAACATATAGTGAAGCCACAGATGTATATGTTTGATGCTACATCTCTATGCCTACTGCCTCGGA
XLOC_012711	1	TGCTGTTGACAGTGAGCGCTGACTTACCTCTGCATTTTTATAGTGAAGCCACAGATGTATAAAAATGCAGAGGTAAGTCAATGCCTACTGCCTCGGA
XLOC_012711	15	TGCTGTTGACAGTGAGCGAGCTATCTATTCTCAAGAATTATAGTGAAGCCACAGATGTATAATTCTTGAGAATAGATAGCCTGCCTACTGCCTCGGA
XLOC_012711	16	TGCTGTTGACAGTGAGCGCCCTCTGCATTTTTCTCACTTATAGTGAAGCCACAGATGTATAAGTGAGAAAAATGCAGAGGTTGCCTACTGCCTCGGA
XLOC_012711	18	TGCTGTTGACAGTGAGCGACTAGACCAGCCTCATTTTTAATAGTGAAGCCACAGATGTATTAAAAATGAGGCTGGTCTAGGTGCCTACTGCCTCGGA
XLOC_012918	1	TGCTGTTGACAGTGAGCGAACAGTTCACAGATCATAATAATAGTGAAGCCACAGATGTATTATTATGATCTGTGAACTGTCTGCCTACTGCCTCGGA
XLOC_012918	3	TGCTGTTGACAGTGAGCGCCACAGTAACCAAGCAATTACATAGTGAAGCCACAGATGTATGTAATTGCTTGGTTACTGTGTTGCCTACTGCCTCGGA
XLOC_012918	4	TGCTGTTGACAGTGAGCGATGCTACGATCTTGTCTCAAAATAGTGAAGCCACAGATGTATTTTGAGACAAGATCGTAGCAGTGCCTACTGCCTCGGA
XLOC_012918	10	TGCTGTTGACAGTGAGCGCTCTGCAGATCCCACAGTGAAATAGTGAAGCCACAGATGTATTTCACTGTGGGATCTGCAGATTGCCTACTGCCTCGGA
XLOC_012918	19	TGCTGTTGACAGTGAGCGATACGATCTTGTCTCAAAAGAATAGTGAAGCCACAGATGTATTCTTTTGAGACAAGATCGTAGTGCCTACTGCCTCGGA
XLOC_012928	1	TGCTGTTGACAGTGAGCGCGACTGCCATCGTCTCAGTCTATAGTGAAGCCACAGATGTATAGACTGAGACGATGGCAGTCATGCCTACTGCCTCGGA
XLOC_012928	10	TGCTGTTGACAGTGAGCGAAGAGGAAAAGCTGACTTTGTATAGTGAAGCCACAGATGTATACAAAGTCAGCTTTTCCTCTCTGCCTACTGCCTCGGA
XLOC_012928	17	TGCTGTTGACAGTGAGCGATGGAGTCCCTCTGTCAAATAATAGTGAAGCCACAGATGTATTATTTGACAGAGGGACTCCAGTGCCTACTGCCTCGGA
XLOC_012928	20	TGCTGTTGACAGTGAGCGCGCCCTGGGTTGTCATAGCATATAGTGAAGCCACAGATGTATATGCTATGACAACCCAGGGCATGCCTACTGCCTCGGA
XLOC_013048	7	TGCTGTTGACAGTGAGCGAATGATTGAATCTTCCTGCTTATAGTGAAGCCACAGATGTATAAGCAGGAAGATTCAATCATGTGCCTACTGCCTCGGA
XLOC_013048	8	TGCTGTTGACAGTGAGCGACAGAGGTACAATTACTTCTGATAGTGAAGCCACAGATGTATCAGAAGTAATTGTACCTCTGGTGCCTACTGCCTCGGA
XLOC_013048	12	TGCTGTTGACAGTGAGCGCGGGTGTCTCTCATTCTTCTCATAGTGAAGCCACAGATGTATGAGAAGAATGAGAGACACCCTTGCCTACTGCCTCGGA
XLOC_013048	13	TGCTGTTGACAGTGAGCGAGGTGTCTCTCATTCTTCTCTATAGTGAAGCCACAGATGTATAGAGAAGAATGAGAGACACCCTGCCTACTGCCTCGGA
XLOC_013048	14	TGCTGTTGACAGTGAGCGAAAACAGGATTTCCCTATTTTATAGTGAAGCCACAGATGTATAAAATAGGGAAATCCTGTTTCTGCCTACTGCCTCGGA
XLOC_013308	5	TGCTGTTGACAGTGAGCGCCCCTCTCCTCTGTCCTCCTTATAGTGAAGCCACAGATGTATAAGGAGGACAGAGGAGAGGGTTGCCTACTGCCTCGGA
XLOC_013308	6	TGCTGTTGACAGTGAGCGCCCAATTGCTCTCTCTGCCTTATAGTGAAGCCACAGATGTATAAGGCAGAGAGAGCAATTGGATGCCTACTGCCTCGGA
XLOC_013308	7	TGCTGTTGACAGTGAGCGACCTTCTGATGTTTGTGTATGATAGTGAAGCCACAGATGTATCATACACAAACATCAGAAGGGTGCCTACTGCCTCGGA
XLOC_013308	8	TGCTGTTGACAGTGAGCGCGTAAACAGCTGTCTCATTCAATAGTGAAGCCACAGATGTATTGAATGAGACAGCTGTTTACATGCCTACTGCCTCGGA
XLOC_013308	9	TGCTGTTGACAGTGAGCGCGGAAACATTCTGAGGATTTGATAGTGAAGCCACAGATGTATCAAATCCTCAGAATGTTTCCATGCCTACTGCCTCGGA
XLOC_013596	1	TGCTGTTGACAGTGAGCGAAGACAGTATCGTGTTATTACATAGTGAAGCCACAGATGTATGTAATAACACGATACTGTCTGTGCCTACTGCCTCGGA
XLOC_013596	2	TGCTGTTGACAGTGAGCGAAGACAGTATCGTGTTATTACATAGTGAAGCCACAGATGTATGTAATAACACGATACTGTCTGTGCCTACTGCCTCGGA
XLOC_013596	6	TGCTGTTGACAGTGAGCGCCAGTATCGTGTTATTACTACATAGTGAAGCCACAGATGTATGTAGTAATAACACGATACTGTTGCCTACTGCCTCGGA
XLOC_013596	7	TGCTGTTGACAGTGAGCGCCAGTATCGTGTTATTACTACATAGTGAAGCCACAGATGTATGTAGTAATAACACGATACTGTTGCCTACTGCCTCGGA
XLOC_013596	10	TGCTGTTGACAGTGAGCGACCTACTGAAGCAGAAAGCAGATAGTGAAGCCACAGATGTATCTGCTTTCTGCTTCAGTAGGCTGCCTACTGCCTCGGA
XLOC_013947	1	TGCTGTTGACAGTGAGCGCCAGAAGCAGTCTTCCAAATTATAGTGAAGCCACAGATGTATAATTTGGAAGACTGCTTCTGTTGCCTACTGCCTCGGA
XLOC_013947	3	TGCTGTTGACAGTGAGCGCTGCAGTCGAGTTTCCTCGAAATAGTGAAGCCACAGATGTATTTCGAGGAAACTCGACTGCATTGCCTACTGCCTCGGA
XLOC_013947	7	TGCTGTTGACAGTGAGCGACAGGTAAGTATAAATGTCTTATAGTGAAGCCACAGATGTATAAGACATTTATACTTACCTGGTGCCTACTGCCTCGGA
XLOC_013947	8	TGCTGTTGACAGTGAGCGAAAACCTGATGCCCATCACATATAGTGAAGCCACAGATGTATATGTGATGGGCATCAGGTTTCTGCCTACTGCCTCGGA
XLOC_013947	10	TGCTGTTGACAGTGAGCGCGAAAATCAAACATTTGTTTGATAGTGAAGCCACAGATGTATCAAACAAATGTTTGATTTTCTTGCCTACTGCCTCGGA
XLOC_014182	2	TGCTGTTGACAGTGAGCGCGCCACCATGCTTCTCACCATATAGTGAAGCCACAGATGTATATGGTGAGAAGCATGGTGGCATGCCTACTGCCTCGGA
XLOC_014182	20	TGCTGTTGACAGTGAGCGAGTGGCTACTGCTGTTGCCTTATAGTGAAGCCACAGATGTATAAGGCAACAGCAGTAGCCACCTGCCTACTGCCTCGGA
XLOC_014313	4	TGCTGTTGACAGTGAGCGACTTCACTTTAATTTCTTCTGATAGTGAAGCCACAGATGTATCAGAAGAAATTAAAGTGAAGGTGCCTACTGCCTCGGA
XLOC_014313	9	TGCTGTTGACAGTGAGCGCCTGGTGCAGGGTACTGTGTAATAGTGAAGCCACAGATGTATTACACAGTACCCTGCACCAGATGCCTACTGCCTCGGA
XLOC_014313	12	TGCTGTTGACAGTGAGCGAGACTGTCACCTCTTCTTCTGATAGTGAAGCCACAGATGTATCAGAAGAAGAGGTGACAGTCCTGCCTACTGCCTCGGA
XLOC_014313	15	TGCTGTTGACAGTGAGCGACCCAGCCTTAGAGAAACTGTATAGTGAAGCCACAGATGTATACAGTTTCTCTAAGGCTGGGGTGCCTACTGCCTCGGA
XLOC_014313	20	TGCTGTTGACAGTGAGCGAACAGCAGTTAATGGTATTTTATAGTGAAGCCACAGATGTATAAAATACCATTAACTGCTGTCTGCCTACTGCCTCGGA
XLOC_014688	1	TGCTGTTGACAGTGAGCGAAGTCCTGTTTCTTCTTGTTTATAGTGAAGCCACAGATGTATAAACAAGAAGAAACAGGACTGTGCCTACTGCCTCGGA
XLOC_014688	2	TGCTGTTGACAGTGAGCGAAGTCCTGTTTCTTCTTGTTTATAGTGAAGCCACAGATGTATAAACAAGAAGAAACAGGACTGTGCCTACTGCCTCGGA
XLOC_014688	3	TGCTGTTGACAGTGAGCGCCCTGTTTCTTCTTGTTTATAATAGTGAAGCCACAGATGTATTATAAACAAGAAGAAACAGGATGCCTACTGCCTCGGA
XLOC_014688	4	TGCTGTTGACAGTGAGCGCCCTGTTTCTTCTTGTTTATAATAGTGAAGCCACAGATGTATTATAAACAAGAAGAAACAGGATGCCTACTGCCTCGGA
XLOC_014688	5	TGCTGTTGACAGTGAGCGACATCCCTTCTCTTCCTCCTTATAGTGAAGCCACAGATGTATAAGGAGGAAGAGAAGGGATGCTGCCTACTGCCTCGGA
XLOC_014727	2	TGCTGTTGACAGTGAGCGCCATCCTCAAGCAGATAGTCTATAGTGAAGCCACAGATGTATAGACTATCTGCTTGAGGATGTTGCCTACTGCCTCGGA
XLOC_014727	7	TGCTGTTGACAGTGAGCGCGCCCTTGGAAACAGAACCAAATAGTGAAGCCACAGATGTATTTGGTTCTGTTTCCAAGGGCATGCCTACTGCCTCGGA
XLOC_014727	14	TGCTGTTGACAGTGAGCGCAGAGAGCAAGAACAAGAACAATAGTGAAGCCACAGATGTATTGTTCTTGTTCTTGCTCTCTTTGCCTACTGCCTCGGA
XLOC_014727	20	TGCTGTTGACAGTGAGCGCCTACTGAAAACAGATGAGTGATAGTGAAGCCACAGATGTATCACTCATCTGTTTTCAGTAGATGCCTACTGCCTCGGA
XLOC_014878	2	TGCTGTTGACAGTGAGCGCGAGCCTTGTGGTTTCTTCTGATAGTGAAGCCACAGATGTATCAGAAGAAACCACAAGGCTCATGCCTACTGCCTCGGA
XLOC_014878	3	TGCTGTTGACAGTGAGCGCTGCATGTATTGGTTCACCTTATAGTGAAGCCACAGATGTATAAGGTGAACCAATACATGCATTGCCTACTGCCTCGGA
XLOC_014878	4	TGCTGTTGACAGTGAGCGAGAGGGTGAGTGAGTCAGCCTATAGTGAAGCCACAGATGTATAGGCTGACTCACTCACCCTCCTGCCTACTGCCTCGGA
XLOC_014878	5	TGCTGTTGACAGTGAGCGCCAGGTCTACTTCCACACCATATAGTGAAGCCACAGATGTATATGGTGTGGAAGTAGACCTGTTGCCTACTGCCTCGGA
XLOC_014878	6	TGCTGTTGACAGTGAGCGATGAACTGAAACTGCTGATATATAGTGAAGCCACAGATGTATATATCAGCAGTTTCAGTTCAGTGCCTACTGCCTCGGA
XLOC_015039	1	TGCTGTTGACAGTGAGCGACTGGATGATATTTGTCATTTATAGTGAAGCCACAGATGTATAAATGACAAATATCATCCAGGTGCCTACTGCCTCGGA
XLOC_015039	2	TGCTGTTGACAGTGAGCGCCCCAAGGTTGCACAAAGTAAATAGTGAAGCCACAGATGTATTTACTTTGTGCAACCTTGGGATGCCTACTGCCTCGGA
XLOC_015039	6	TGCTGTTGACAGTGAGCGCCATGATTTCTGTTCCTCTTGATAGTGAAGCCACAGATGTATCAAGAGGAACAGAAATCATGATGCCTACTGCCTCGGA
XLOC_015039	7	TGCTGTTGACAGTGAGCGCTCACATCGTTCTTAGTAATTATAGTGAAGCCACAGATGTATAATTACTAAGAACGATGTGAATGCCTACTGCCTCGGA
XLOC_015039	8	TGCTGTTGACAGTGAGCGACCAAAGTCTATTGCTGTCTCATAGTGAAGCCACAGATGTATGAGACAGCAATAGACTTTGGGTGCCTACTGCCTCGGA
XLOC_015143	1	TGCTGTTGACAGTGAGCGACTGGAGGAATGTATATTTATATAGTGAAGCCACAGATGTATATAAATATACATTCCTCCAGCTGCCTACTGCCTCGGA
XLOC_015143	3	TGCTGTTGACAGTGAGCGCGCTGGAGGAATGTATATTTAATAGTGAAGCCACAGATGTATTAAATATACATTCCTCCAGCATGCCTACTGCCTCGGA
XLOC_015143	4	TGCTGTTGACAGTGAGCGCGAAGTTGTTGGAAGAATCAGATAGTGAAGCCACAGATGTATCTGATTCTTCCAACAACTTCATGCCTACTGCCTCGGA
XLOC_015143	11	TGCTGTTGACAGTGAGCGACAGAGATCAGAAGGAATTAAATAGTGAAGCCACAGATGTATTTAATTCCTTCTGATCTCTGGTGCCTACTGCCTCGGA
XLOC_015143	15	TGCTGTTGACAGTGAGCGCCCAGTGTTCAATGCTGGAAAATAGTGAAGCCACAGATGTATTTTCCAGCATTGAACACTGGTTGCCTACTGCCTCGGA
XLOC_015287	1	TGCTGTTGACAGTGAGCGACGCTGACATCATTTCATGATATAGTGAAGCCACAGATGTATATCATGAAATGATGTCAGCGGTGCCTACTGCCTCGGA
XLOC_015287	2	TGCTGTTGACAGTGAGCGATCTAGCCTTTCTTTTTAATTATAGTGAAGCCACAGATGTATAATTAAAAAGAAAGGCTAGAGTGCCTACTGCCTCGGA
XLOC_015287	3	TGCTGTTGACAGTGAGCGCGAGATGCCTTCTCAATATTTATAGTGAAGCCACAGATGTATAAATATTGAGAAGGCATCTCATGCCTACTGCCTCGGA
XLOC_015287	6	TGCTGTTGACAGTGAGCGAAGCCAGGTCTGCTTTGATATATAGTGAAGCCACAGATGTATATATCAAAGCAGACCTGGCTGTGCCTACTGCCTCGGA
XLOC_015287	11	TGCTGTTGACAGTGAGCGCCTGAGAGTCAGACAAACCCTATAGTGAAGCCACAGATGTATAGGGTTTGTCTGACTCTCAGTTGCCTACTGCCTCGGA
XLOC_015918	1	TGCTGTTGACAGTGAGCGAAGAGAGCTAGCTGCATCTTTATAGTGAAGCCACAGATGTATAAAGATGCAGCTAGCTCTCTGTGCCTACTGCCTCGGA
XLOC_015918	2	TGCTGTTGACAGTGAGCGACCAGCCTTCAGTTTTTCTCTATAGTGAAGCCACAGATGTATAGAGAAAAACTGAAGGCTGGGTGCCTACTGCCTCGGA
XLOC_015918	4	TGCTGTTGACAGTGAGCGCAAGGCCCAGCCTTCAGTTTTATAGTGAAGCCACAGATGTATAAAACTGAAGGCTGGGCCTTTTGCCTACTGCCTCGGA
XLOC_015918	5	TGCTGTTGACAGTGAGCGACAGCCTTCAGTTTTTCTCTTATAGTGAAGCCACAGATGTATAAGAGAAAAACTGAAGGCTGGTGCCTACTGCCTCGGA
XLOC_015918	10	TGCTGTTGACAGTGAGCGAGCCCAGCCTTCAGTTTTTCTATAGTGAAGCCACAGATGTATAGAAAAACTGAAGGCTGGGCCTGCCTACTGCCTCGGA
XLOC_016144	1	TGCTGTTGACAGTGAGCGATCACAATGATCTTTTCCCTTATAGTGAAGCCACAGATGTATAAGGGAAAAGATCATTGTGAGTGCCTACTGCCTCGGA
XLOC_016144	2	TGCTGTTGACAGTGAGCGCTGGGGACATTTCATCAGGTAATAGTGAAGCCACAGATGTATTACCTGATGAAATGTCCCCAATGCCTACTGCCTCGGA
XLOC_016144	6	TGCTGTTGACAGTGAGCGAGACTTCTGTATTTCCTGTTTATAGTGAAGCCACAGATGTATAAACAGGAAATACAGAAGTCCTGCCTACTGCCTCGGA
XLOC_016144	8	TGCTGTTGACAGTGAGCGACAGGACTTCTGTATTTCCTGATAGTGAAGCCACAGATGTATCAGGAAATACAGAAGTCCTGCTGCCTACTGCCTCGGA
XLOC_016144	9	TGCTGTTGACAGTGAGCGCCACCTCAAGCTCACAATGATATAGTGAAGCCACAGATGTATATCATTGTGAGCTTGAGGTGATGCCTACTGCCTCGGA

## Sheet: Controls_hairpins
Rpa3.455	TGCTGTTGACAGTGAGCGCGCGACTCCTATAATTTCTAATTAGTGAAGCCACAGATGTAATTAGAAATTATAGGAGTCGCTTGCCTACTGCCTCGGA
Renilla.713	TGCTGTTGACAGTGAGCGCAGGAATTATAATGCTTATCTATAGTGAAGCCACAGATGTATAGATAAGCATTATAATTCCTATGCCTACTGCCTCGGA
