# Supplementary material for: lncRNA requirements for mouse acute myeloid leukemia and normal differentiation
Source: eLife. 2017 Sep 6;6:e25607. doi: 10.7554/eLife.25607 (PMC5619947; doi:10.7554/eLife.25607)
Supplement: Supplementary file 5. [file elife-25607-supp5.xls]

## Sheet: Sheet1
Identifier	Target	Primer set name	Primer 1 Sequence (5'-3')	Primer 2 Sequence (5'-3')	Idt PrimeTime Primer ID (if applicable)
XLOC_041249	XLOC_003554_set1	3554_exon1-2	GCCTGGTCTACACAGAGAAATC	AGCTGCTCTGATTCAAGATGG
XLOC_041249	XLOC_003554_set2	Leah_3554_F2_R2	TTCGTTCAGTTGGCAGGATAC	CTGCTTAGCGAGACCGACTAT
XLOC_041249_upstream	Srsf5	Leah_Srsf5_Exon_7-8	AATTGAAGGCAGCAAAAGGC	TGTAAGACTTGCTCCTTCGTG	Mm.PT.58.7928253.g
XLOC_041249_downstream	Susd6/MllRik	Susd6_Set2	GCC AAA GCT GAA GTC TTT CC	CTG GAC ACC ATC CAC CAT AA
XLOC_071255	XLOC_005468/Pvt1_set1	5468_hp1	GCCTGCATAACTATCTGCTTCT	GCATCCTGGAAAGAAATGCTAAC
XLOC_071255	XLOC_005468/Pvt1_set2	5468_exon_6-7	gccggaggcaatcctataa	CGT CTC ATT CTC TTA GGG TCA G
XLOC_071255_upstream	Myc	Myc_exon_1-2a	CTG TTT GAA GGC TGG ATT TCC	GTC GTA GTC GAG GTC ATA GTT C	Mm.PT.58.13590978
XLOC_071255_downstream	Fam49b	Leah_Fam49b_Exon_7-8	AGA AGA ACA TTG AGT CGT ATG AGA	GCC TCA GCG TAA AAC AAT GAC	Mm.PT.56a.32321116
XLOC_096443	XLOC_007358_set1	Leah_7358_F2_R2	GAGATAGCCAGTTGAAAGCCAG	CAGCCCAGTTGGAGAATCCA
XLOC_096443	XLOC_007358_set2	Leah_7358_F3_R3	GGGCTTTGGTGGTAGCCTAG	CATAAACCCAGCCAAGCCTTC
XLOC_096443_upstream	Kctd1	Kctd1_exon_3-4	CCA CCC TCA CCA AAT ACC C	TCT GAA CAT CTG CCC GTC T	Mm.PT.58.29096487
XLOC_096443_downstream	Taf4b	Taf4b_exon_7-8	GAC AGC CAA AGT CAA GCA AC	CTT CTG CCC ACA GTT CTG AG	Mm.PT.58.9380738
XLOC_097790	XLOC_007661_set1	Leah_7661_F1_R1	CAGTGAACTCCCGGTGCAAG	GACATCGGAGCGAGTTTCCA
XLOC_097790	XLOC_007661_set2	7661_exon2	GGG AGA CTG AGA GAA TGA GAA TG	CAA GCC ACT GAT TTC AGA ACA C
XLOC_097790_upstream	Rbm27	Leah_Rbm27_exon_1-2	CCTTCTTGACCAGTGCTACA	TGCTCATAGAAGATGTGGATGC	Mm.PT.58.29902323
XLOC_097790_downstream	Lars	Leah_Lars_exon_6-7	GCTTGATTATTTCCCACCACTG	AAGTTAAAAACTGCCACCTGAC	Mm.PT.56a.43735719
XLOC_104449	XLOC_007931_set1	7931_hp4	CTTGGTTGTTCACCCTTCAATC	CAGAAGTCCCATGATCCATGTAG
XLOC_104449	XLOC_007931_set2	7931_exon1	CAA GCT GTC TCT CTG CCT TT	TAT GTA ACA AGT GCC GGA AGG
XLOC_104449_upstream	Ak3	Ak3_exon_4-5	GAT GAC AAA CCA GAG ACA GTG A	AGA ATG TTT CCA ACA CCC CTT	Mm.PT.58.43369051
XLOC_104449_downstream	Rcl1	Leah_Rcl1_exon_2-3	CAGAGCTTCCAGGTAATAGCC	CTCGAATTGAAATCAACCAAACAG	Mm.PT.58.41251138
XLOC_124982	XLOC_009665_set1	Leah_9665_F1_R1	AAATTACTGGTGCGATCTGCTC	GTCGTAGCAGCCCTCAGAAG
XLOC_124982	XLOC_009665_set2	9665_exon_2-3	CTG CTA CGA CAC AGA CTA CAT T	GCT CTT CCA CTC TTC CTT TCT
XLOC_124982_upstream	Ccln1	Leah_Ccln1_exon_10-11	AGA CAG CAA GAG AAG CAG AAC	ATG TTC CAG ATC GAC TTC GC	Mm.PT.58.5188536
XLOC_124982_downstream	Rsc1	Rsc1_exon_3-4	GAG TTC AAA GGT CTC GGT CAA	ACT GGA TCT TTC ACT GCT TCT AC	Mm.PT.56a.12374786
XLOC_141992	XLOC_011053_set1	Leah_11053_F1_R1	CCCTTACTTCTTTGAGTGTCCAG	GAGTTACTGTGGCTTCAAGC
XLOC_141992	XLOC_011053_set1	Leah_11053_F3_R3	AGTCATATGGCTCAAAACTGCATG	GAAGGATCTGGTTGTCCGAGT
XLOC_141992_upstream	Caap/5830433M19Rik	Caap_exon_4-6	TTCGTCCTCCAGCGTCT	CATTCAGATCCAGTCCACCTTC	Mm.PT.56a.6586246
XLOC_141992_downstream	Tusc1	Tusc1_exon_1-1	TGC CTG TTC ATT CTA CTG TCC	GGG CTA TCC AAG TCA GCA AT	Mm.PT.58.29001108.g
XLOC_166788	XLOC_012928_set1	Leah_12928_F1_R1	GAGGGCTGGATTTCTACCAGG	GTTCTCTGAGGTTGAGGCAGATC
XLOC_166788	XLOC_012928_set2	Leah_12928_F2_R2	GATCTGCCTCAACCTCAGAGAAC	CAGCCTCTCCATATCTTCCCAC
XLOC_166788_upstream	Gata2	Gata2_exon_3-4	GCA GCA GTC TCT TCC ATC C	CAC CAC AGT TGA CAC ACT CC-	Mm.PT.58.29618383
XLOC_166788_downstream	Rpn1	Leah_Rpn1_exon_1-2	AGCCAGCTCTTTCGTTCTG	GGTTTCTCGTACTTCTAGGTTGT	Mm.PT.58.12957180
XLOC_177417	XLOC_13308_set1	Leah_13308_F1_R1	GCCAAGGGCTCAAGTTCAATTC	CTATGTGTATGTGTCTGTGGCAGT
XLOC_177417	XLOC_13308_set2	13308_hp8	GGAAACAGCCTACGAACTCAA	GAGAGACTGCCAAGCTCAATAG
XLOC_177417_upstream	Tm2d3	Leah_Tm2d3_exon_3-4	ACCAATGTCTCCTGCACTTAC	TGTTGATGACGAAGTTCCTCTG	Mm.PT.58.42473734
XLOC_177417_downstream	Snrpa1	Leah_Snrpa1_exon_3-4	CCG TAT AGG TGA GGG ACT TGA	TGT CAG TGA TTT GAG AGA TGC C	Mm.PT.58.6777754
Control	Gapdh	Gapdh_set1	GCCTTCCGTGTTCCTACC	CCTCAGTGTAGCCCAAGATG
